# Supplementary material
Source: PubMed Central journal article supplement (PMC3322416)

# Ni- and Pd-Catalyzed Synthesis of Substituted and Functionalized Allylic Boronates

Ping Zhang, Ian A. Roundtree, James P. Morken\*

*Department of Chemistry, Merkert Chemistry Center, Boston College, Chestnut Hill, MA 02467*

## Supporting Information

### Table of Contents

|                                                                         |      |
|-------------------------------------------------------------------------|------|
| <b>GENERAL INFORMATION</b> .....                                        | S-2  |
| <b>EXPERIMENTAL PROCEDURES</b> .....                                    | S-3  |
| Preparation and Characterization of Allylic Acetates.....               | S-3  |
| Representative Procedures for Allylic Borylation.....                   | S-6  |
| Characterization and Proof of Stereochemistry.....                      | S-8  |
| Representative Procedures for the One-Pot Borylation/Allylboration..... | S-13 |
| <b>SPECTRAL DATA</b> .....                                              | S-15 |

## GENERAL INFORMATION

$^1\text{H}$  NMR spectra were recorded on either a Varian Gemini-400 (400 MHz), a Varian Gemini-500 (500 MHz) or a Varian Inova-500 (500 MHz) spectrometer. Chemical shifts are reported in ppm with the solvent resonance as the reference ( $\text{CDCl}_3$ : 7.26 ppm). Data are reported as follows: chemical shift, integration, multiplicity (s = singlet, d = doublet, t = triplet, q = quartet, m = multiplet), coupling constants (Hz), and assignment.  $^{13}\text{C}$  NMR spectra were recorded on either a Varian Gemini-400 (100 MHz), or a Varian Gemini-500 (125 MHz) or a Varian Inova-500 (125 MHz) spectrometer with complete proton decoupling. Chemical shifts are reported in ppm with the solvent resonance as the reference ( $\text{CDCl}_3$ : 77.0 ppm). Carbons with directly attached boron atoms were not observed in some compounds, most likely due to quadrupolar relaxation.<sup>1</sup> Infrared (IR) spectra were recorded on a Bruker alpha spectrophotometer,  $\nu_{\text{max}}$   $\text{cm}^{-1}$ . Bands are characterized as broad (br), strong (s), medium (m), and weak (w). High-resolution mass spectra (ESI) were obtained at the Mass Spectrometry Facility, Boston College. The melting point was recorded on a laboratory Melt-Temp device,  $^{\circ}\text{C}$ .

Liquid Chromatography was performed using forced flow (flash chromatography) on silica gel ( $\text{SiO}_2$ , 230 $\times$ 450 mesh) purchased from Silicycle. Thin Layer Chromatography was performed on 25  $\mu\text{m}$  silica gel plates purchased from Silicycle. Visualization was performed using ultraviolet light (254 nm) or potassium permanganate ( $\text{KMnO}_4$ ) in water.

All reactions were conducted in oven- or flame-dried glasswares under an inert atmosphere of nitrogen or argon unless stated otherwise. Tetrahydrofuran (THF) was purified using a Pure Solv MD-4 solvent purification system from Innovative Technology Inc. Ethyl acetate was purified by drying with calcium hydride and distilled under  $\text{N}_2$ . Dimethyl sulfoxide (DMSO) was purified by drying with calcium hydride and distilled under high vacuum. Benzaldehyde was freshly distilled under high vacuum prior to use. Tricyclohexylphosphine ( $\text{PCy}_3$ ), tris(dibenzylideneacetone) dipalladium(0) [ $\text{Pd}_2(\text{dba})_3$ ], bis(1,5-cyclooctadiene)nickel(0) [ $\text{Ni}(\text{cod})_2$ ] were purchased from Strem Chemicals, Inc. 2-Methylallyl acetate was purchased from Tokyo Chemical Industry (TCI).

---

<sup>1</sup> Wrackmeyer, B. *Prog. NMR Spectrosc.* **1979**, *12*, 227.

Bis(pinacolato)diboron [B<sub>2</sub>(pin)<sub>2</sub>] was obtained from Allylchem Co., Ltd. and recrystallized from pentane prior to use. All other reagents were purchased from either Fisher or Aldrich and used without further purification.

## EXPERIMENTAL PROCEDURES

### Preparation and Characterization of Allylic Acetates

**Representative Procedure for the Synthesis of Allylic Acetates.** The non-commercially available allylic acetate substrates were generally prepared by the acetylation of the corresponding allylic alcohols as shown below.

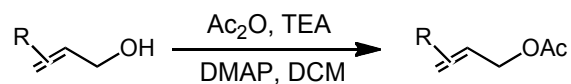

The following allylic acetates were prepared from commercially available allylic alcohols: hex-1-en-3-yl acetate (Table 2, entry 3),<sup>2</sup> (*E*)-3-(benzo[*d*][1,3]dioxol-5-yl)allyl acetate (Table 2, entry 6)<sup>3</sup> and (*E*)-2-methylbut-2-en-1-yl acetate (Table 4, entry 5).<sup>4</sup> Spectral data are in accordance with the literature references.

**Preparation of (*Z*)-dec-2-en-1-yl acetate.** From allylic alcohol **S-2**, which was synthesized through Ni-catalyzed hydroboration of decadiene as shown below.<sup>5</sup>

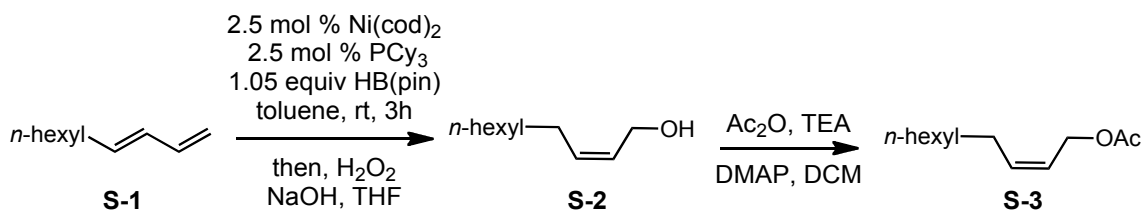

<sup>2</sup> Strazzolini, P.; Giumanin, A. G.; Verardo, G. *Tetrahedron* **1994**, *50*, 217.

<sup>3</sup> Kumar, V.; Sharma, A.; Sharma, M.; Sharma, U. K.; Shiha, A. K. *Tetrahedron* **2007**, *63*, 9718.

<sup>4</sup> Rowan, D. D.; Heather, P.; Allen, J. M.; Fielder, S.; Hunt, M. B. *J. Agric. Food. Chem.* **1996**, *44*, 3276.

<sup>5</sup> Ely, R. J.; Morken, J. P. *J. Am. Chem. Soc.* **2010**, *132*, 2534.

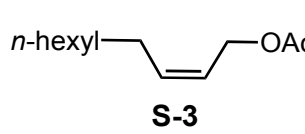
**(Z)-dec-2-en-1-yl acetate (Table 2, entry 5).** <sup>1</sup>H NMR (500 MHz, CDCl<sub>3</sub>): δ 0.88 (3H, t, *J* = 7.0 Hz, CH<sub>2</sub>CH<sub>3</sub>), 1.27-1.39 (10H, m, (CH<sub>2</sub>)<sub>5</sub>CH<sub>3</sub>), 2.06 (3H, s, COCH<sub>3</sub>), 2.09 (2H, dt, *J* = 7.4, 7.4 Hz, CH<sub>2</sub>CH<sub>2</sub>CH=CH), 4.61 (2H, dd, *J* = 6.3, 0.6 Hz, CH=CHCH<sub>2</sub>O), 5.49-5.55 (1H, m, CH<sub>a</sub>=CH<sub>b</sub>), 5.62-5.67 (1H, m, CH<sub>a</sub>=CH<sub>b</sub>); <sup>13</sup>C NMR (125 MHz, CDCl<sub>3</sub>): δ 14.1, 21.0, 22.6, 27.5, 29.12, 29.14, 29.4, 31.8, 60.4, 123.2, 135.5, 171.0; IR (neat): 2956.4 (w), 2924.9 (m), 2855.2 (w), 1740.0 (s), 1459.1 (w), 1371.5 (m), 1225.0 (s), 1024.6 (m), 962.8 (w), 840.5 (w), 643.4 (w), 606.8 (w) cm<sup>-1</sup>; HRMS (ESI+) for C<sub>12</sub>H<sub>26</sub>NO<sub>2</sub> [M+NH<sub>4</sub>]: calculated: 216.1964, found: 216.1969. The crude reaction mixture was purified on silica gel (flushed with 100:1 hexanes/EtOAc) to afford 2.13 g (95% yield) of (Z)-dec-2-en-1-yl acetate as a colorless oil. *R*<sub>f</sub> = 0.53 (8:1 hexanes/EtOAc, stain in KMnO<sub>4</sub>).

**Preparation of 1-(tert-butyldimethylsilyl)allyl acetate.** From commercially available (allyloxy)(tert-butyl)dimethylsilane, procedure was modified from the literature procedure.<sup>6</sup>

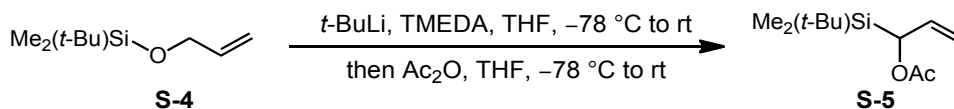

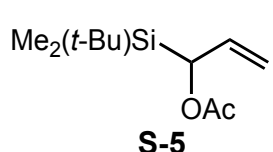
**1-(tert-butyldimethylsilyl)allyl acetate (Table 2, entry 8).** To a flame-dried round-bottom flask equipped with a stir bar was added (allyloxy)(tert-butyl)dimethylsilane (345 mg, 2.0 mmol), tetramethylethylenediamine (TMEDA, 326 mg, 2.8 mmol) and THF (4 mL). The reaction was cooled to -78 °C and 1.6 M *tert*-butyllithium in pentane (1.5 mL, 2.4 mmol) was added dropwise over 10 minutes, *via* syringe. The reaction was allowed to slowly warm up to room temperature. After stirring for another 30 minutes, the reaction was cooled to -78 °C and quenched with acetic anhydride (283 mg, 2.8 mmol) in THF (0.25 mL). The reaction was allowed to warm to room temperature and stir for one hour. Water was then slowly added, and the reaction was extracted into diethyl ether three times. The combined organic layers were washed with saturated NaHCO<sub>3</sub> and brine, dried over Na<sub>2</sub>SO<sub>4</sub>, filtered, and concentrated *in vacuo*. The crude reaction mixture was purified on silica gel (50:1

<sup>6</sup> Han, S. B.; Gao, X.; Krische, M. J. *J. Am. Chem. Soc.* **2010**, *132*, 9153.

hexanes/Et<sub>2</sub>O) to afford 162 mg (38% yield) of 1-(tert-butyldimethylsilyl)allyl acetate as colorless oil.  $R_f = 0.52$  (8:1 hexanes/EtOAc, stain in KMnO<sub>4</sub>). Spectral data are in accordance with the literature references.<sup>7</sup>

**Preparation of (*E*)-3-(triethylsilyl)allyl acetate.** From (*E*)-3-(triethylsilyl)prop-2-en-1-ol (**S-7**), which was synthesized through the Rh-catalyzed hydrosilylation of prop-2-yn-1-ol as shown below.<sup>8</sup>

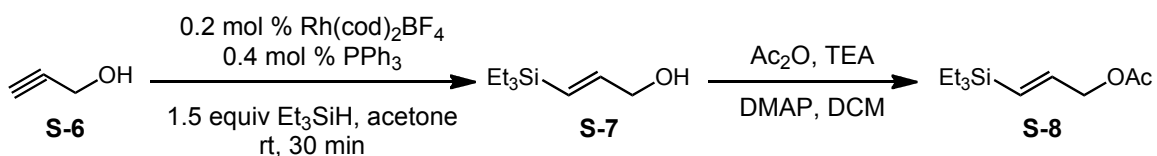

CC(C)C=C[Si](CC)CCOC(=O)C (**S-8**) (*E*)-3-(triethylsilyl)allyl acetate (Table 2, entry 9). <sup>1</sup>H NMR (500 MHz, CDCl<sub>3</sub>): δ 0.58 (6H, q,  $J = 8.1$  Hz, Si(CH<sub>2</sub>CH<sub>3</sub>)<sub>3</sub>), 0.93 (9H, t,  $J = 8.1$  Hz, Si(CH<sub>2</sub>CH<sub>3</sub>)<sub>3</sub>), 2.10 (3H, s, COCH<sub>3</sub>), 4.60 (2H, dd,  $J = 5.1, 1.5$  Hz, CH=CHCH<sub>2</sub>OAc), 5.87 (1H, dt,  $J = 19.0, 1.5$  Hz, CH=CHCH<sub>2</sub>OAc), 6.07 (1H, dt,  $J = 18.9, 5.1$  Hz, CH=CHCH<sub>2</sub>OAc); <sup>13</sup>C NMR (125 MHz, CDCl<sub>3</sub>): δ 3.3, 7.3, 21.0, 67.1, 129.8, 140.5, 170.7; IR (neat): 2953.2 (w), 2910.9 (w), 2875.3 (w), 1743.3 (s), 1623.7 (w), 1458.1 (w), 1416.2 (w), 1376.2 (w), 1226.6 (s), 1068.7 (w), 1014.8 (m), 985.9 (m), 845.2 (w), 777.7 (m), 760.1 (m), 718.0 (s), 637.1 (w), 606.2 (w); HRMS (ESI+) for C<sub>11</sub>H<sub>23</sub>O<sub>2</sub>Si [M+H]: calculated: 215.1467, found: 215.1463. The crude reaction mixture was purified on silica gel (flushed with 30:1 hexanes/EtOAc) to afford 1.21 g (90% yield) of (*E*)-3-(triethylsilyl)allyl acetate as a colorless oil.  $R_f = 0.54$  (8:1 hexanes/EtOAc, stain in KMnO<sub>4</sub>).

<sup>7</sup> Panek, J. S.; Cirillo, P. F. *J. Am. Chem. Soc.* **1990**, *112*, 4873.

<sup>8</sup> Takeuchi, R.; Nitta, S.; Watanabe, D. *J. Org. Chem.* **1995**, *60*, 3045.

## Representative Procedures for Allylic Borylation

### Representative Procedure for Pd<sub>2</sub>(dba)<sub>3</sub> Catalyzed Allylic Borylation (Table 1, entries 1-3 and Table 3, entries 1-4, 6).

In a dry-box under an argon atmosphere, an oven-dried 2-dram vial equipped with a magnetic stir bar was charged with tris(dibenzylideneacetone) dipalladium(0) (2.3 mg, 0.0025 mmol), bis(pinacolato)diboron (254 mg, 1.0 mmol), THF (0.5 mL) and lastly, cinnamylchloride (153 mg, 1.0 mmol). The vial was capped and taped with electrical tape, removed from the dry-box, and allowed to stir at 60 °C for 12 hours. The vial was then cooled to ambient temperature, and the reaction mixture was directly analyzed using <sup>1</sup>H NMR to determine the conversion of reaction. Silica gel chromatography (50:1 pentane/Et<sub>2</sub>O) afforded 220 mg (90% yield) of 2-cinnamyl-4,4,5,5-tetramethyl-1,3,2-dioxaborolane as a colorless oil.

### Representative Procedures for Pd<sub>2</sub>(dba)<sub>3</sub> Catalyzed Allylic Borylation with Bases (Table 1, entries 4-6).

In a dry-box under an argon atmosphere, an oven-dried 2-dram vial equipped with a magnetic stir bar was charged with tris(dibenzylideneacetone) dipalladium(0) (22.9 mg, 0.025 mmol), bis(pinacolato)diboron (127 mg, 0.5 mmol), THF (1 mL), 2-methylallyl acetate (57.1 mg, 0.5 mmol) and cesium carbonate (489 mg, 1.5 mmol). The vial was capped and taped with electrical tape, removed from the dry-box, and allowed to stir at 60 °C for 12 hours. The vial was then cooled to ambient temperature. The reaction was diluted with diethyl ether, filtered through a plug of silica gel, washed with more diethyl ether, and concentrated in *vacuo*. An 84% reaction conversion was determined by <sup>1</sup>H NMR analysis of the crude reaction mixture. No purification was performed.

### Representative Procedures for PdCl<sub>2</sub> Catalyzed Allylic Borylation (Table 3, entries 1-4 and 6).

An oven-dried 2-dram vial equipped with a magnetic stir bar was charged with palladium(II) chloride (0.9 mg, 0.005 mmol) and bis(pinacolato)diboron (254 mg, 1.0 mmol). The vial was sealed with a septum and purged three times with N<sub>2</sub>. THF (0.5 mL) was added by syringe, followed by the addition of cinnamylchloride (153 mg, 1.0 mmol). The septum was quickly replaced with a cap, and the reaction was allowed to stir at 60 °C for 12 hours. The reaction was then cooled to ambient temperature, and the reaction mixture was directly analyzed using <sup>1</sup>H NMR to determine the conversion of reaction. Silica gel chromatography (50:1 pentane/Et<sub>2</sub>O) afforded 237 mg (97% yield) of 2-cinnamyl-4,4,5,5-tetramethyl-1,3,2-dioxaborolane as colorless oil.

**Representative Procedures for PdCl<sub>2</sub> Catalyzed Allylic Borylation with KOAc (Table 3, entry 5).**

An oven-dried 2-dram vial equipped with a magnetic stir bar was charged with palladium(II) chloride (0.9 mg, 0.005 mmol), bis(pinacolato)diboron (254 mg, 1.0 mmol) and potassium acetate (98.2 mg, 1.0 mmol). The vial was sealed with a septum and purge three times with N<sub>2</sub>. THF (0.5 mL) was added by syringe, followed by the addition of 2-methylallyl chloride (90.1 mg, 1.0 mmol). The septum was quickly replaced with a cap, and the reaction was allowed to stir at 60 °C for 12 hours. The reaction was then cooled to ambient temperature. The reaction was diluted with diethyl ether, filtered through a plug of silica gel, washed with more diethyl ether, and concentrated in *vacuo*. The reaction conversion was determined by <sup>1</sup>H NMR of the crude reaction mixture. Silica gel chromatography (50:1 pentane/Et<sub>2</sub>O) afforded 127 mg (70% yield) of (*E*)-2-(but-2-en-1-yl)-4,4,5,5-tetramethyl-1,3,2-dioxaborolane as colorless oil.

**Representative Procedures for Ni(cod)<sub>2</sub>/Phosphine Allylic Borylation (Table 1, entries 7-10, Table 2 and Scheme 2).**

In a dry-box under an argon atmosphere, an oven-dried 2-dram vial equipped with a magnetic stir bar was charged with bis(1,5-cyclooctadiene)nickel(0) (6.9 mg, 0.025 mmol), tricyclohexylphosphine (7.0 mg, 0.025 mmol) and EtOAc (1.0 mL). Cinnamyl acetate (88.1 mg, 0.5 mmol) was then added, followed by bis(pinacolato)diboron (127 mg, 0.5 mmol). The

vial was capped and sealed, removed from the dry-box, and allowed to stir at 60 °C for 12 hours. The vial was then cooled to ambient temperature, and the crude reaction mixture was directly analyzed using <sup>1</sup>H NMR to determine the conversion of reaction. Silica gel chromatography (50:1 pentane/Et<sub>2</sub>O) afforded 224 mg (92% yield) of 2-cinnamyl-4,4,5,5-tetramethyl-1,3,2-dioxaborolane as colorless oil.

### Characterization and Proof of Stereochemistry

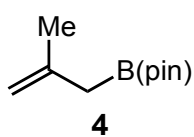

**4,4,5,5-tetramethyl-2-(2-methylallyl)-1,3,2-dioxaborolane (Table 1).** The crude reaction mixture was purified on silica gel (50:1 pentane/Et<sub>2</sub>O) to afford a clear, colorless oil (60.0 mg, 67% yield).  $R_f = 0.49$  (8:1 hexanes/EtOAc, stain in KMnO<sub>4</sub>). Spectral data are in accordance with the literature references.<sup>9</sup>

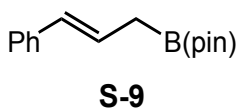

**2-cinnamyl-4,4,5,5-tetramethyl-1,3,2-dioxaborolane (Table 2, entry 1).** The crude reaction mixture was purified on silica gel (50:1 pentane/Et<sub>2</sub>O) to afford a clear, colorless oil (109.9 mg, 90% yield).  $R_f = 0.45$  (8:1 hexanes/EtOAc, stain in KMnO<sub>4</sub>). Spectral data are in accordance with the literature reference.<sup>10</sup>

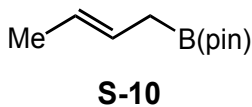

**(E)-2-(but-2-en-1-yl)-4,4,5,5-tetramethyl-1,3,2-dioxaborolane (Table 2, entry 2 and Table 3, entries 2-3).** The crude reaction mixture was purified on silica gel (50:1 pentane/Et<sub>2</sub>O) to afford a clear, colorless oil (76.5 mg, 84% yield) with 5% (Z)-2-(cyclooct-4-en-1-yl)-4,4,5,5-tetramethyl-1,3,2-dioxaborolane as impurity from <sup>1</sup>H NMR analysis.  $R_f = 0.55$  (8:1 hexanes/EtOAc, stain in KMnO<sub>4</sub>). Spectral data are in accordance with the literature reference.<sup>11</sup>

<sup>9</sup> (a) Ishiyama, T.; Ahiko, T.; Miyaura, N. *Tetrahedron Lett.* **1996**, *37*, 6889. (b) Zhang, P.; Brozek, L. A.; Morken, J. P. *J. Am. Chem. Soc.* **2010**, *132*, 10686.

<sup>10</sup> Selander, N.; Szabó, K. J. *J. Org. Lett.* **2009**, *74*, 5695.

<sup>11</sup> Roush, W. R.; Adam, M. A.; Walts, A. E.; Harris, D. J. *J. Am. Chem. Soc.* **1986**, *108*, 3422.



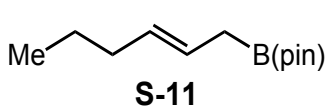

**(E)-2-(hex-2-en-1-yl)-4,4,5,5-tetramethyl-1,3,2-dioxaborolane** (Table 2, entries 3-4). <sup>1</sup>H NMR (500 MHz, CDCl<sub>3</sub>): δ 0.86 (3H, t, *J* = 9 Hz, CH<sub>2</sub>CH<sub>3</sub>), 1.21 (12 H, s, (C(CH<sub>3</sub>)<sub>2</sub>)<sub>2</sub>), 1.29-1.39 (2H, m, CH<sub>2</sub>CH<sub>3</sub>), 1.62 (2H, d, *J* = 8.0 Hz, CH<sub>2</sub>B), 1.95 (2H, app q, *J* = 8.5 Hz, CH<sub>2</sub>CH<sub>2</sub>CH=CH), 5.33-5.47 (2H, m, CH<sub>2</sub>CH<sub>2</sub>CH=CH); <sup>13</sup>C NMR (125 MHz, CDCl<sub>3</sub>): δ 13.6, 22.7, 24.7, 34.8, 83.1, 124.8, 130.8; IR (neat): 2978.1 (w), 2959.3 (w), 2929.4 (w), 2872.7 (w), 1457.7 (w), 1359.0 (m), 1323.3 (s), 1142.9 (s), 965.8 (s), 846.8 (m), 673.8 (m), 520.0 (w) cm<sup>-1</sup>; HRMS (ESI+) for C<sub>12</sub>H<sub>24</sub>BO<sub>2</sub> [M+H]: calculated: 211.1869, found: 211.1876. The crude reaction mixture was purified on silica gel (50:1 pentane/Et<sub>2</sub>O) to afford a clear, colorless oil (99.3 mg, 94% yield). *R*<sub>f</sub> = 0.6 (8:1 hexanes/EtOAc, stain in KMnO<sub>4</sub>).

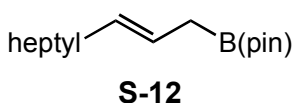

**(E)-2-(dec-2-en-1-yl)-4,4,5,5-tetramethyl-1,3,2-dioxaborolane** (Table 2, entry 5). <sup>1</sup>H NMR (500 MHz, CDCl<sub>3</sub>): δ 0.87 (3H, t, *J* = 7.0 Hz, CH<sub>2</sub>CH<sub>3</sub>), 1.20-1.37 (22 H, m, CH<sub>3</sub>(CH<sub>2</sub>)<sub>5</sub> and (C(CH<sub>3</sub>)<sub>2</sub>)<sub>2</sub>), 1.63 (2H, d, *J* = 6.0 Hz, CH<sub>2</sub>B), 1.96 (2H, app q, *J* = 6.5 Hz, CH<sub>2</sub>CH<sub>2</sub>CH=CH), 5.31-5.46 (2H, m, CH<sub>2</sub>CH<sub>2</sub>CH=CH); <sup>13</sup>C NMR (125 MHz, CDCl<sub>3</sub>): δ 14.1, 22.7, 24.7, 29.1, 29.2, 29.7, 31.9, 32.7, 83.1, 124.6, 131.1 ppm; IR (neat): 2976.1 (w), 2956.3 (w), 2928.4 (w), 1460.7 (w), 1356.3 (m), 1321.2 (s), 1141.0 (s), 962.3 (s), 842.3 (m), 671.1 (m), 654.2 (m), 431.2 (w) cm<sup>-1</sup>; HRMS (ESI+) for C<sub>16</sub>H<sub>32</sub>BO<sub>2</sub> [M+H]: calculated: 267.2469, found: 267.2472. The crude reaction mixture was purified on silica gel (50:1 pentane/Et<sub>2</sub>O) to afford a clear, colorless oil (122.5 mg, 92% yield). *R*<sub>f</sub> = 0.66 (8:1 hexanes/EtOAc, stain in KMnO<sub>4</sub>).

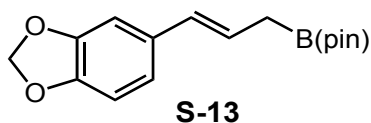

**(E)-2-(3-(benzo[*d*][1,3]dioxol-5-yl)allyl)-4,4,5,5-tetramethyl-1,3,2-dioxaborolane.** <sup>1</sup>H NMR (500 MHz, CDCl<sub>3</sub>): δ 1.26 (12H, s, (C(CH<sub>3</sub>)<sub>2</sub>)<sub>2</sub>), 1.84 (2H, d, *J* = 7.3 Hz, CH=CHCH<sub>2</sub>B), 5.93 (2H, s, OCH<sub>2</sub>O), 6.10 (1H, dt, *J* = 15.6, 7.6 Hz, CH=CHCH<sub>2</sub>B), 6.28 (1H, d, *J* = 15.6 Hz, CH=CHCH<sub>2</sub>B), 6.70-6.75 (2H, m, ArH), 6.89 (1H, s, ArH); <sup>13</sup>C NMR (125 MHz, CDCl<sub>3</sub>): δ 24.8, 83.4, 100.8, 105.4, 108.1, 120.0, 124.9, 129.8, 132.8, 146.3, 147.8; IR (neat): 2977.6 (w), 2930.4 (w), 2877.4 (w), 1488.8 (m), 1442.3 (m), 1360.4 (m), 1326.8 (s), 1276.2 (s), 1248.0 (s), 1140.5 (s), 1119.6 (s), 1033.3 (s), 963.3 (s), 929.1 (s), 876.8 (s), 844.9 (m), 799.8 (s), 521.2 (m) cm<sup>-1</sup>; HRMS (ESI+) for C<sub>16</sub>H<sub>22</sub>BO<sub>4</sub> [M+H]:

calculated: 289.1611, found: 289.1612. The crude reaction mixture was purified on silica gel (10:1 pentane/Et<sub>2</sub>O) to afford a white solid (108.4 mg, 95% yield).  $R_f = 0.33$  (8:1 hexanes/EtOAc, stain in KMnO<sub>4</sub>). Melting point: 48 °C.

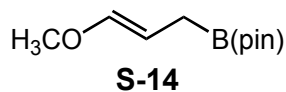

**(E)-2-(3-methoxyallyl)-4,4,5,5-tetramethyl-1,3,2-**

**dioxaborolane (Table 2, entry 7).** <sup>1</sup>H NMR (400 MHz, CDCl<sub>3</sub>): δ 1.26 (12H, s, (C(CH<sub>3</sub>)<sub>2</sub>)<sub>2</sub>), 1.51 (2H, d,  $J = 7.4$  Hz, CH=CHCH<sub>2</sub>B), 3.49 (3H, s, OCH<sub>3</sub>), 4.76 (1H, dt,  $J = 12.7, 7.3$  Hz, CH=CHCH<sub>2</sub>B), 6.27 (1H, d,  $J = 12.7$  Hz, CH=CHCH<sub>2</sub>B); <sup>13</sup>C NMR (100 MHz, CDCl<sub>3</sub>): δ 24.8, 55.9, 83.2, 97.8, 147.0; IR (neat): 2978.5 (w), 2934.0 (w), 1653.3 (w), 1358.5 (m), 1321.9 (s), 1272.5 (w), 1212.0 (m), 1143.5 (s), 1123.0 (s), 1105.6 (m), 967.2 (m), 881.2 (m), 845.7 (m), 673.2 (w), 539.8 (w) cm<sup>-1</sup>; HRMS (ESI+) for C<sub>10</sub>H<sub>20</sub>BO<sub>3</sub> [M+H]: calculated: 199.1506, found: 199.1497. The crude reaction mixture was purified on silica gel (100:1 → 25:1 pentane/Et<sub>2</sub>O) to afford a clear, colorless oil (51.5 mg, 52% yield).  $R_f = 0.38$  (8:1 hexanes/EtOAc, stain in KMnO<sub>4</sub>).

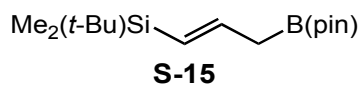

**tert-butyl dimethyl(3-(4,4,5,5-tetramethyl-1,3,2-**  
**dioxaborolan-2-yl)prop-1-en-1-yl)silane (Table 2, entry 8).**

<sup>1</sup>H NMR (500 MHz, CDCl<sub>3</sub>): δ -0.01 (*E*, 6H, s, Si(CH<sub>3</sub>)<sub>2</sub>), 0.09 (*Z*, 6H, s, Si(CH<sub>3</sub>)<sub>2</sub>), 0.85 (*E*, 9H, s, SiC(CH<sub>3</sub>)<sub>3</sub>), 0.88 (*Z*, 9H, s, SiC(CH<sub>3</sub>)<sub>3</sub>), 1.236 (*E*, 12H, s, (C(CH<sub>3</sub>)<sub>2</sub>)<sub>2</sub>), 1.243 (*Z*, 12H, s, (C(CH<sub>3</sub>)<sub>2</sub>)<sub>2</sub>), 1.82-1.85 (2H, m, CH=CHCH<sub>2</sub>B), 5.47 (*Z*, 1H, dt,  $J = 14.2, 1.3$  Hz, CH=CHCH<sub>2</sub>B), 5.60 (*E*, 1H, dt,  $J = 18.5, 1.5$  Hz, CH=CHCH<sub>2</sub>B), 6.08 (*E*, 1H, dt,  $J = 18.5, 7.2$  Hz, CH=CHCH<sub>2</sub>B), 6.51 (*Z*, 1H, dt,  $J = 14.2, 8.3$  Hz, CH=CHCH<sub>2</sub>B); <sup>13</sup>C NMR (125 MHz, CDCl<sub>3</sub>): δ -6.1, -4.1, 10.6, 16.5, 24.6, 24.71, 24.74, 26.4, 26.5, 30.9, 83.2, 82.3, 125.2, 127.5, 143.4, 144.7; IR (neat): 2978.7 (w), 2952.5 (w), 2927.7 (w), 2884.2 (w), 2855.3 (w), 2040.0 (w), 1744.4 (w), 1608.6 (w), 1470.0 (w), 1370.5 (w), 1323.6 (s), 1272.0 (w), 1247.2 (m), 1214.7 (w), 1164.7 (w), 1143.7 (s), 1105.0 (w), 1006.7 (w), 986.9 (w), 967.0 (w), 938.0 (w), 885.2 (w), 847.9 (w), 825.5 (s), 810.0 (m), 773.8 (m), 715.8 (w), 576.9 (w), 545.7 (w) cm<sup>-1</sup>; HRMS (ESI+) for C<sub>15</sub>H<sub>32</sub>BO<sub>2</sub>Si [M+H]: calculated: 283.2265, found: 283.2257. The crude reaction mixture was purified on silica gel (pentane → 100:1 pentane/Et<sub>2</sub>O) to afford a clear, colorless

oil (98.7 mg, 70% yield) as a mixture of *E* and *Z* isomers (2.5:1 *E*:*Z*).  $R_f = 0.61$  (8:1 hexanes/EtOAc, stain in  $\text{KMnO}_4$ ).

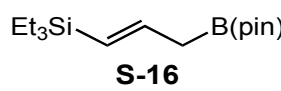 **S-16** triethyl(3-(4,4,5,5-tetramethyl-1,3,2-dioxaborolan-2-yl)prop-1-en-1-yl)silane (Table 2, entry 9).  $^1\text{H}$  NMR (500 MHz,  $\text{CDCl}_3$ ):

$\delta$  0.53 (*E*, 6H, q,  $J = 8.0$  Hz,  $(\text{CH}_3\text{CH}_2)_3\text{Si}$ ), 0.62 (*Z*, 6H, q,  $J = 8.0$  Hz,  $(\text{CH}_3\text{CH}_2)_3\text{Si}$ ), 0.88-0.96 (9H, m,  $(\text{CH}_3\text{CH}_2)_3\text{Si}$ ), 1.24 (*E*, 12H, s,  $(\text{C}(\text{CH}_3)_2)_2$ ), 1.26 (*Z*, 12H, s,  $(\text{C}(\text{CH}_3)_2)_2$ ), 1.83 (2H, d,  $J = 7.5$  Hz,  $\text{CH}=\text{CHCH}_2\text{B}$ ), 5.38 (*Z*, d,  $J = 14.0$  Hz,  $\text{SiCH}=\text{CHCH}_2$ ), 5.53 (*E*, d,  $J = 18.5$  Hz,  $\text{SiCH}=\text{CHCH}_2$ ), 6.08 (*E*, dt,  $J = 18.5, 7.5$  Hz,  $\text{SiCH}=\text{CHCH}_2$ ), 6.08 (*Z*, dt,  $J = 14.0, 7.5$  Hz,  $\text{SiCH}=\text{CHCH}_2$ );  $^{13}\text{C}$  NMR (125 MHz,  $\text{CDCl}_3$ ):  $\delta$  3.6, 4.6, 7.3, 7.5, 24.8, 83.2, 124.6, 126.3, 143.5, 145.0; IR (neat): 2978.8 (w), 2952.2 (w), 2910.4 (w), 2874.3 (w), 1609.1 (w), 1323.0 (s), 1143.5 (s), 1013.9 (w), 987.1 (w), 966.7 (w), 847.8 (w), 716.0 (s)  $\text{cm}^{-1}$ ; HRMS (ESI+) for  $\text{C}_{15}\text{H}_{32}\text{BO}_2\text{Si}$  [ $\text{M}+\text{H}$ ]: calculated: 283.2265, found: 283.2258. The crude reaction mixture was purified on silica gel (pentane  $\rightarrow$  100:1 pentane/ $\text{Et}_2\text{O}$ ) to afford a clear, colorless oil (131.2 mg, 93% yield) as a mixture of *E* and *Z* isomers (2.2:1 *E*:*Z*).  $R_f = 0.60$  (8:1 hexanes/EtOAc, stain in  $\text{KMnO}_4$ ).

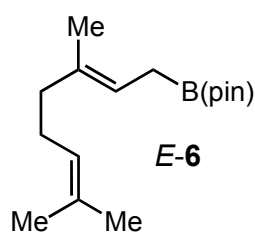

**(*E*)-2-(3,7-dimethylocta-2,6-dien-1-yl)-4,4,5,5-tetramethyl-1,3,2-dioxaborolane (*E*-6).** The crude reaction mixture was purified on silica gel (50:1 pentane/ $\text{Et}_2\text{O}$ ) to afford a clear, colorless oil (131.9 mg, quat. yield).  $R_f = 0.55$  (8:1 hexanes/ $\text{EtOAc}$ , stain in  $\text{KMnO}_4$ ). Spectral data are in accordance with the literature references.<sup>12</sup>

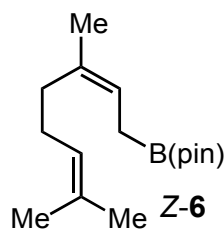

**(*Z*)-2-(3,7-dimethylocta-2,6-dien-1-yl)-4,4,5,5-tetramethyl-1,3,2-dioxaborolane (*Z*-6).**  $^1\text{H}$  NMR (500 MHz,  $\text{CDCl}_3$ ):  $\delta$  1.24 (12H, s,  $(\text{C}(\text{CH}_3)_2)_2$ ), 1.61 (5H, m,  $(\text{CH}_3)_a\text{C}=\text{CH}$  and  $\text{CH}_2\text{B}$ ), 1.68 (3H, s,  $(\text{CH}_3)_b\text{C}=\text{CH}$ ), 1.69 (3H, s,  $(\text{CH}_3)_c\text{C}=\text{CH}$ ), 2.00-2.06 (4H, m,  $\text{CCH}_2\text{CH}_2\text{C}$ ), 5.13 (1H, tq,  $J = 7.0, 1.5$  Hz,  $(\text{C}=\text{CH})_a\text{CH}_2$ ), 5.24 (1H, tq,  $J = 7.5, 1.5$  Hz,  $(\text{C}=\text{CH})_b\text{CH}_2$ );  $^{13}\text{C}$  NMR (125 MHz,  $\text{CDCl}_3$ ):  $\delta$  17.6, 23.5, 24.8, 25.7, 26.4, 31.8, 83.1, 119.1, 124.5, 131.3, 135.2; IR (neat): 2976.9 (w),

<sup>12</sup> (a) Wu, J.; Moreau, B.; Ritter, T. *J. Am. Chem. Soc.* **2009**, *131*, 12915. (b) Dutheuil, G.; Aggarwal, V. K.; Selander, N.; Szabó, K. *J. Synthesis*, **2008**, *14*, 2293.

2925.8 (w), 2856.7 (w), 1448.1 (w), 1370.6 (w), 1340.6 (s), 1322.2 (s), 1272.6 (w), 1214.3 (w), 1143.2 (s), 1106.4 (w), 1074.8 (w), 967.4 (m), 884.5 (m), 845.2 (m), 674.5 (w) 577.8 (w)  $\text{cm}^{-1}$ ; HRMS (ESI+) for  $\text{C}_{16}\text{H}_{30}\text{BO}_2$  [M+H]: calculated: 265.2339, found: 265.2350. The crude reaction mixture was purified on silica gel (pentane  $\rightarrow$  100:1 pentane/Et<sub>2</sub>O) to afford a clear, colorless oil (131.5 mg, >95% yield).  $R_f = 0.55$  (8:1 hexanes/EtOAc, stain in  $\text{KMnO}_4$ ).

**Proof of Stereochemistry.** The relative configuration was assigned by oxidizing the title compound to the corresponding allylic alcohol **S-17**. The <sup>1</sup>H and <sup>13</sup>C spectral of **S-17** are in accordance with commercial nerol.

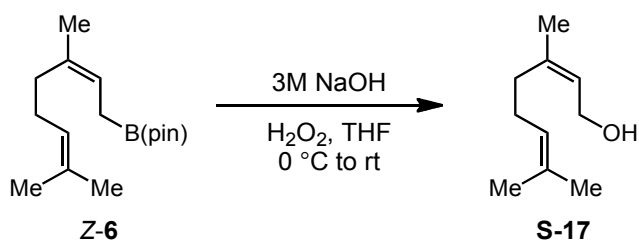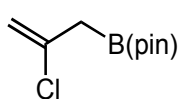

**S-18**

**2-(2-chloroallyl)-4,4,5,5-tetramethyl-1,3,2-dioxaborolane (Table 3, entry 5).** <sup>1</sup>H NMR (500 MHz,  $\text{CDCl}_3$ ):  $\delta$  1.28 (12H, s,  $\text{C}(\text{CH}_3)_2$ ), 2.12 (2H, s,  $\text{CH}_2=\text{CClCH}_2\text{B}$ ), 5.11 (1H, s,  $\text{CH}_a\text{H}_b=\text{CCl}$ ), 5.14 (1H, s,  $\text{CH}_a\text{H}_b=\text{CCl}$ ); <sup>13</sup>C NMR (125 MHz,  $\text{CDCl}_3$ ):  $\delta$  24.7, 83.9, 112.2, 139.2; IR (neat): 2979.6 (w), 2930.8 (w), 1634.1 (w), 1331.1 (w), 1272.9 (w), 1141.4 (s), 968.5 (m), 871.7 (m), 845.6 (m), 671.6 (w), 631.9 (w), 548.6 (w)  $\text{cm}^{-1}$ ; HRMS (ESI+) for  $\text{C}_9\text{H}_{17}\text{BClO}_2$  [M+H]: calculated: 203.1010, found: 203.1015. The crude reaction mixture was purified on silica gel (50:1 pentane/Et<sub>2</sub>O) to afford a clear, colorless oil (69.8 mg, 69% yield).  $R_f = 0.52$  (8:1 hexanes/EtOAc, stain in  $\text{KMnO}_4$ ).

## Representative Procedures for the One-Pot Borylation/Allylboration (Table 4)

## Representative Procedure A:

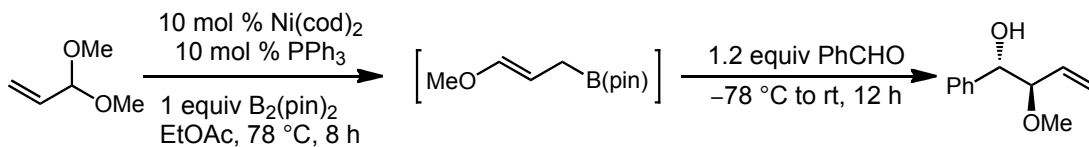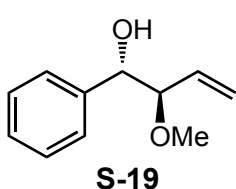

**2-methoxy-1-phenylbut-3-en-1-ol (Table 4, entry 1).** In a dry-box under an argon atmosphere, an oven-dried 2-dram vial equipped with a magnetic stir bar was charged with bis(1,5-cyclooctadiene)nickel(0) (13.8 mg, 0.05 mmol), triphenylphosphine (13.1 mg, 0.05 mmol) and EtOAc (1.0 mL). 3,3-Dimethoxyprop-1-ene (51.1 mg, 0.5 mmol) was then added, followed by bis(pinacolato)diboron (127 mg, 0.5 mmol). The vial was capped and taped with electrical tape, removed from the dry-box, and allowed to stir at 60 °C for 8 hours. The reaction was then concentrated *in vacuo*, cooled to -78 °C and charged with freshly distilled benzaldehyde (63.6 mg, 0.6 mmol) dropwise. The reaction was capped, allowed to warm to room temperature and stir for 12 hours. The reaction was then diluted with 1:1 mixture of diethyl ether and water, and extracted with diethyl ether three times. The combined organic layers were dried over MgSO<sub>4</sub> and concentrated *in vacuo*. Analysis of the crude reaction mixture using <sup>1</sup>H NMR was used to determine the conversion and the diastereoselectivity of the reaction. The crude reaction mixture was purified on silica gel (10:1 hexanes:EtOAc) to afford a clear, colorless oil (78.1 mg, 80% yield). *R*<sub>f</sub> = 0.25 (8:1 hexanes/EtOAc, stain in KMnO<sub>4</sub>). <sup>1</sup>H NMR (500 MHz, CDCl<sub>3</sub>): δ 2.56 (1H, m, OH), 3.33 (3H, s, OCH<sub>3</sub>), 3.78 (1H, m, MeOCHCH=CH<sub>2</sub>), 4.83 (1H, t, *J* = 4.0 Hz, ArCHOH), 5.19 (1H, dq, *J* = 17.5, 1.0 Hz, CH<sub>trans</sub>H<sub>cis</sub>=CH), 5.28 (1H, dq, *J* = 11.0, 1.0 Hz, CH<sub>trans</sub>H<sub>cis</sub>=CH), 5.65 (1H, ddd, *J* = 17.5, 11.0, 8.0 Hz, CH<sub>2</sub>=CH), 7.25-7.28 (1H, m, Ar-H), 7.31-7.35 (4H, m, Ar-H); <sup>13</sup>C NMR (125 MHz, CDCl<sub>3</sub>): δ 56.7, 75.3, 86.6, 120.2, 126.7, 127.5, 128.0, 133.6, 140.1; IR (neat): 3448.7 (w), 2982.0 (w), 2929.4 (w), 2880.7 (w), 2823.7 (w), 1452.1 (m), 1189.1 (m), 1100.8 (m), 1081.6 (m), 1065.1 (m), 989.5 (m), 926.6 (m), 725.1 (m), 697.9 (s) cm<sup>-1</sup>; HRMS (ESI+) for C<sub>11</sub>H<sub>18</sub>NO<sub>2</sub> [M+NH<sub>4</sub>]: calculated: 196.1337, found: 196.1347.

**Proof of Stereochemistry.** The relative configuration was assigned by comparison of the  $^1\text{H}$  with the literature references.<sup>13</sup>

**Representative Procedure B:**

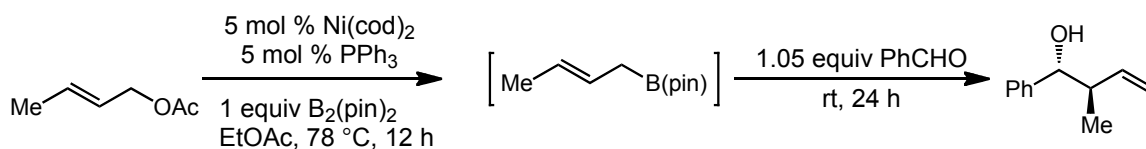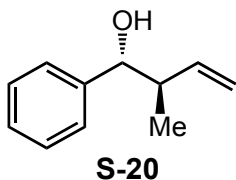

**2-methyl-1-phenylbut-3-en-1-ol (Table 4, entry 3).** In a dry-box under an argon atmosphere, an oven-dried 2-dram vial equipped with a magnetic stir bar was charged with bis(1,5-cyclooctadiene)nickel(0) (6.9 mg, 0.025 mmol), triphenylphosphine (13.1 mg, 0.025 mmol) and EtOAc (1.0 mL). Crotyl acetate (57.1 mg, 0.5 mmol) was then added, followed by bis(pinacolato)diboron (127 mg, 0.5 mmol). The vial was capped and taped with electrical tape, removed from the dry-box, and allowed to stir at 60 °C for 12 hours. The reaction was allowed to cool to ambient temperature and then charged with freshly distilled benzaldehyde (55.7 mg, 0.53 mmol). The reaction was capped again and allowed to stir for another 24 hours. The reaction was then diluted with a 1:1 mixture of diethyl ether and water, and extracted with diethyl ether for three times. The combined organic layers were dried over  $\text{MgSO}_4$  and concentrated in vacuo. Analysis of the crude reaction mixture using  $^1\text{H}$  NMR was used to determine the conversion and the diastereoselectivity of the reaction. The crude reaction mixture was purified on silica gel (12:1 hexanes:EtOAc) to afford a clear, colorless oil (64.9 mg, 80% yield).  $R_f = 0.24$  (8:1 hexanes/EtOAc, stain in  $\text{KMnO}_4$ ). Spectral data are in accordance with the literature reference.<sup>14</sup>

<sup>13</sup> The *syn*-diastereomer of this molecule has been reported: Brown, H. C.; Jadhav, P. K.; Bhat, K. J. *J. Am. Chem. Soc.* **1988**, *110*, 1535.

<sup>14</sup> Katsukiyo, M.; Wang, D.; Hosomi, A.; *J. Am. Chem. Soc.* **2005**, *127*, 9366.

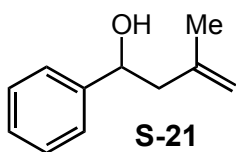

**3-methyl-1-phenylbut-3-en-1-ol (Table 4, entry 2).** Procedure B was followed. The crude reaction mixture was purified on silica gel (12:1 hexanes:EtOAc) to afford a clear, colorless oil (71.3 mg, 88% yield).  $R_f = 0.25$  (8:1 hexanes/EtOAc, stain in  $\text{KMnO}_4$ ). Spectral data are in accordance with the literature reference.<sup>15</sup>

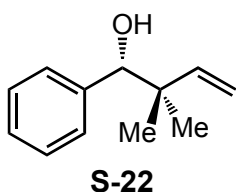

**2,2-dimethyl-1-phenylbut-3-en-1-ol (Table 4, entry 4).** Procedure B was followed. The crude reaction mixture was purified on silica gel (40:1 hexanes:EtOAc) to afford a clear, colorless oil (44.1 mg, 50% yield).  $R_f = 0.38$  (8:1 hexanes/EtOAc, stain in  $\text{KMnO}_4$ ). Spectral data are in accordance with the literature reference.<sup>15</sup>

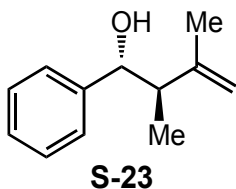

**2,3-dimethyl-1-phenylbut-3-en-1-ol (Table 4, entry 5).** Procedure B was followed. The crude reaction mixture was purified on silica gel (40:1 hexanes:EtOAc) to afford a clear, colorless oil (70 mg, 50% yield) as a mixture of *anti* and *syn* diastereomers (15:1 *anti:syn*).  $R_f = 0.27$  (8:1 hexanes/EtOAc, stain in  $\text{KMnO}_4$ ).  $^1\text{H}$  NMR (500 MHz,  $\text{CDCl}_3$ ):  $\delta$  0.79 (3H, d,  $J = 7.1$  Hz,  $\text{CHCH}_3$ ), 1.79 (3H, m,  $\text{CH}_3\text{C}=\text{CH}_2$ ), 2.27 (1H, d,  $J = 1.7$  Hz, OH), 2.48 (1H, dq,  $J = 9.5, 7.0$  Hz,  $\text{CH}_3\text{CHC}=\text{CH}_2$ ), 4.38 (1H, dd,  $J = 9.5, 1.7$  Hz, ArCHOH), 4.99 (2H, m,  $\text{C}=\text{CH}_2$ ), 7.29-7.37 (5H, m, Ar-H);  $^{13}\text{C}$  NMR (125 MHz,  $\text{CDCl}_3$ ):  $\delta$  15.9, 18.5, 50.1, 76.2, 113.7, 127.1, 127.7, 128.3, 142.5, 147.3; IR (neat): 3442.9 (w), 3066.1 (w), 3029.8 (w), 2967.2 (w), 2935.8 (w), 2899.9 (w), 1644.3 (w), 1493.6 (w), 1453.0 (w), 1373.5 (w), 1318.3 (w), 1271.0 (w), 1193.2 (w), 1086.6 (w), 1072.8 (w), 1053.0 (w), 1017.3 (m), 889.4 (s), 834.7 (w), 751.2 (m), 698.3 (s), 628.8 (w), 568.8 (m), 541.3 (w)  $\text{cm}^{-1}$ ; HRMS (ESI+) for  $\text{C}_{12}\text{H}_{15}$  [ $\text{M}+\text{H}-\text{H}_2\text{O}$ ]: calculated: 159.1174, found: 159.1172.

**Proof of Stereochemistry.** The relative configuration was assigned by comparison of the  $^1\text{H}$  with the literature reference.<sup>16</sup>

## SPECTRAL DATA

<sup>15</sup> Han, S. B.; Kim, I. S.; Han, H.; Krische, M. J. *J. Am. Chem. Soc.* **2009**, *131*, 6916.

<sup>16</sup> Takahara, J. P.; Masuyama, Y.; Kurusu, Y. *J. Am. Chem. Soc.* **1992**, *114*, 2577.

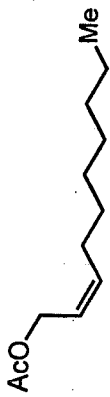

Pulse Sequence: Proton (s2pul)  
Solvent: cdcl3  
Data collected on: Sep 9 2010

Temp. 25.0 C / 298.1 K  
Sample #37, Operator: zhangpa  
INOVA-500 "nmr16"

Relax. delay 1.000 sec  
Pulse 45.0 degrees  
Acq. time 2.049 sec  
Width 6410.3 Hz  
16 repetitions  
OBSERVE H1, 399.7662700 MHz  
DATA PROCESSING  
Resol. enhancement -0.0 Hz  
Ft size 65536  
Total time 0 min 55 sec

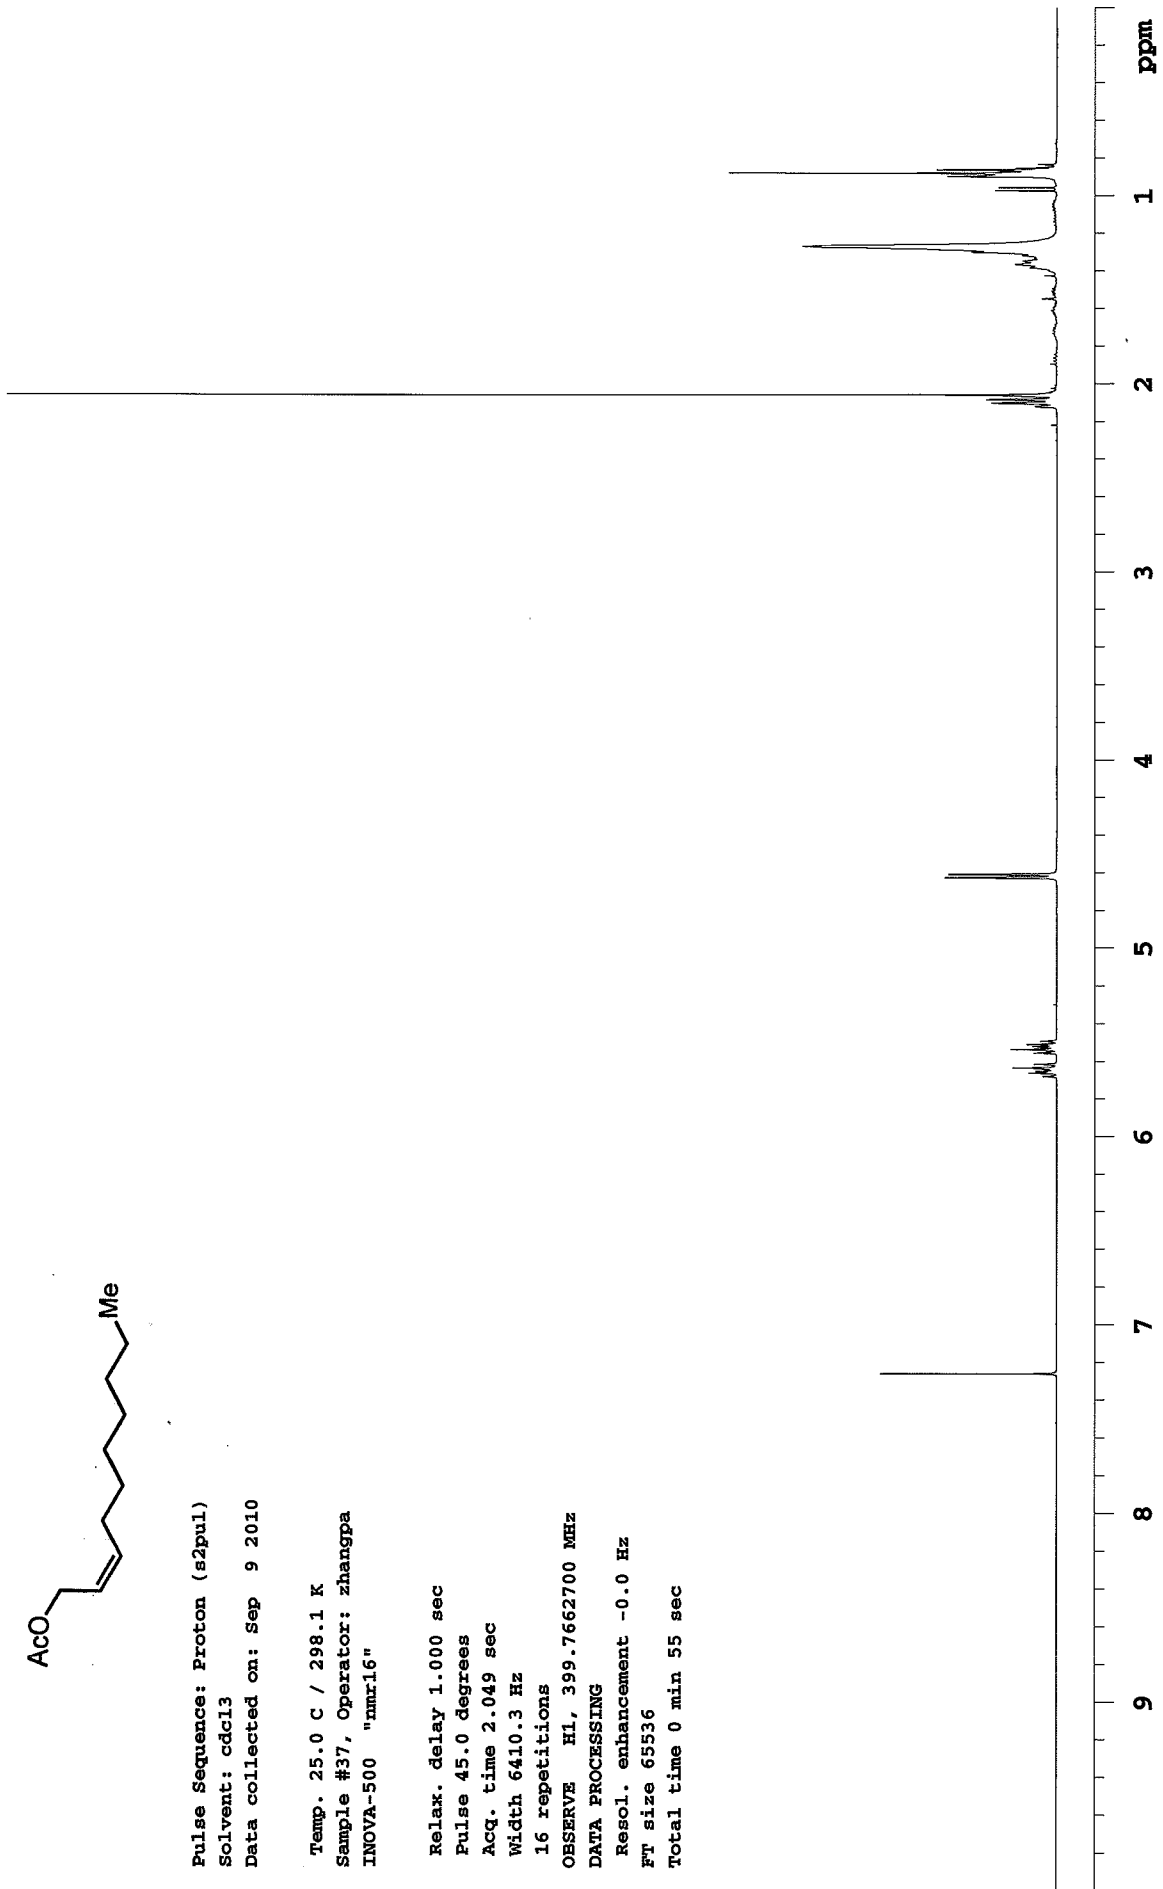



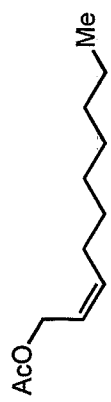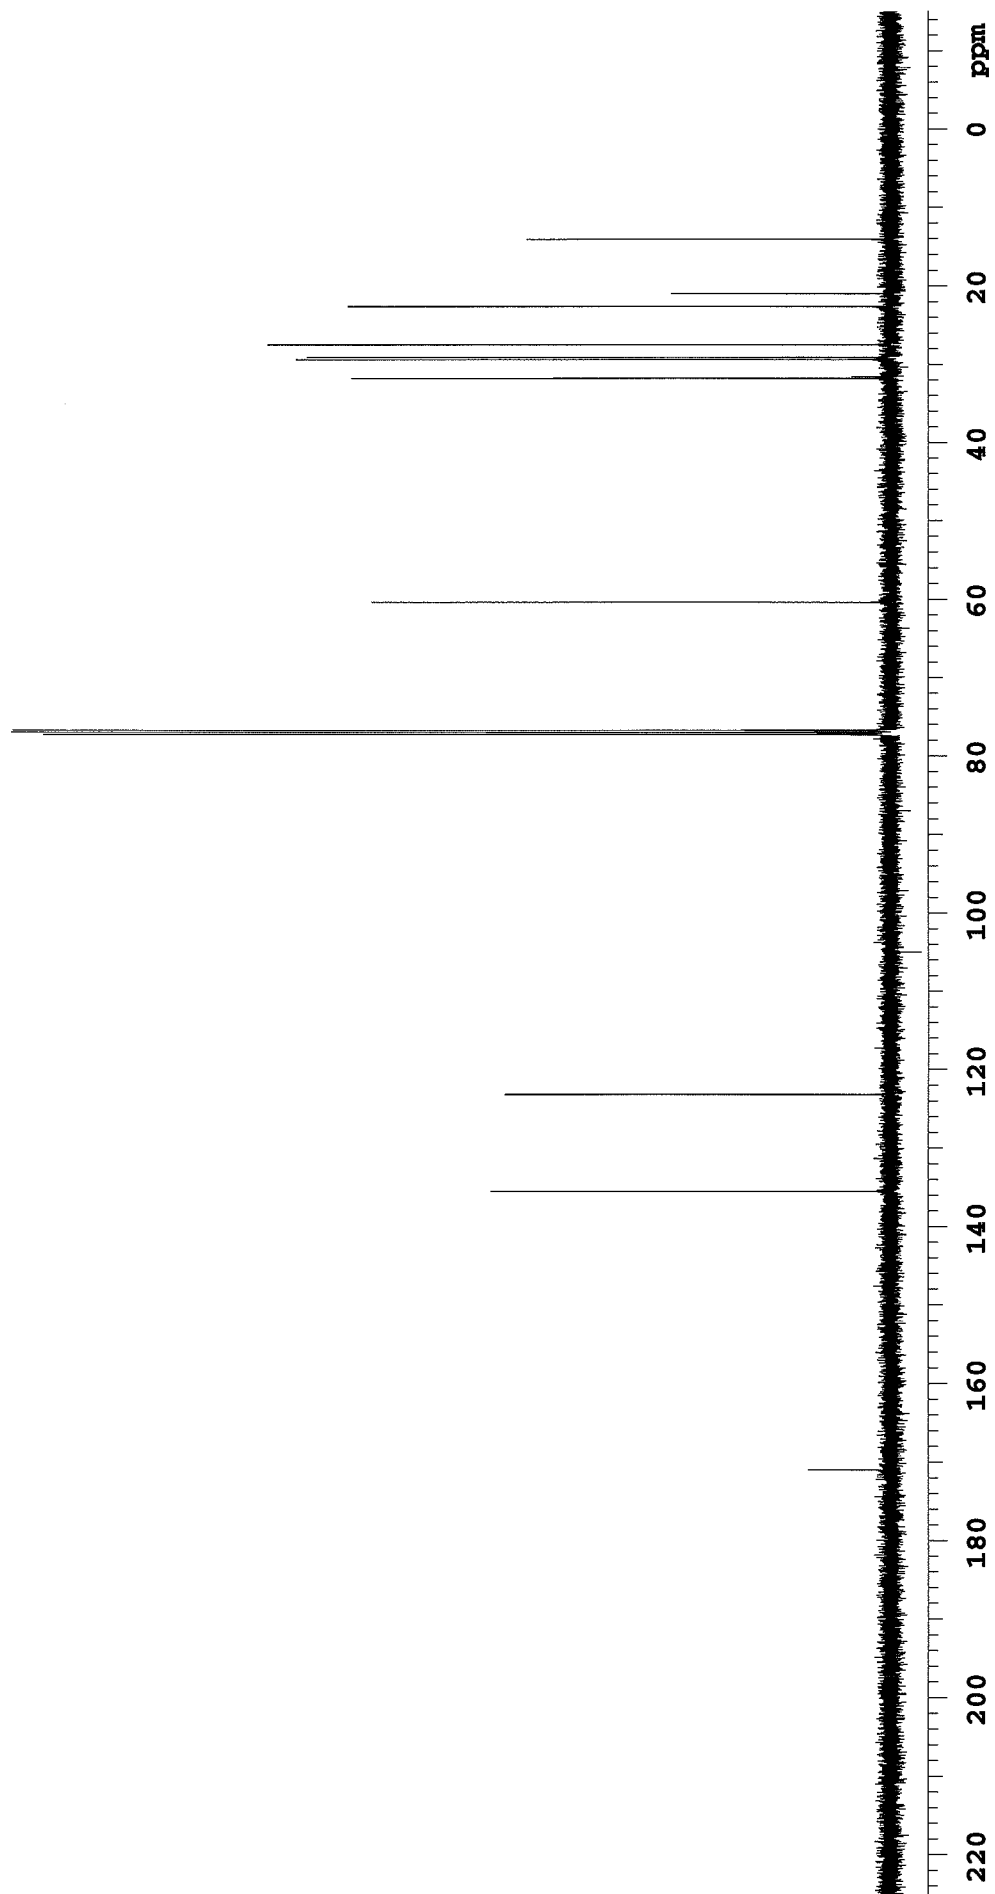

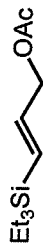

Archive directory:

Sample directory:

FidFile: IAR-2-283-P

Pulse Sequence: Proton (s2pul)

Solvent: cdcl3

Data collected on: Dec 11 2011

Temp. 25.0 C / 298.1 K

Operator: rountri

INOVA-500 "nmr16"

Relax. delay 1.000 sec

Pulse 45.0 degrees

Acq. time 3.000 sec

Width 7996.0 Hz

16 repetitions

OBSERVE H1, 499.7720278 MHz

DATA PROCESSING

Resol. enhancement -0.0 Hz

FT size 65536

Total time 1 min 12 sec

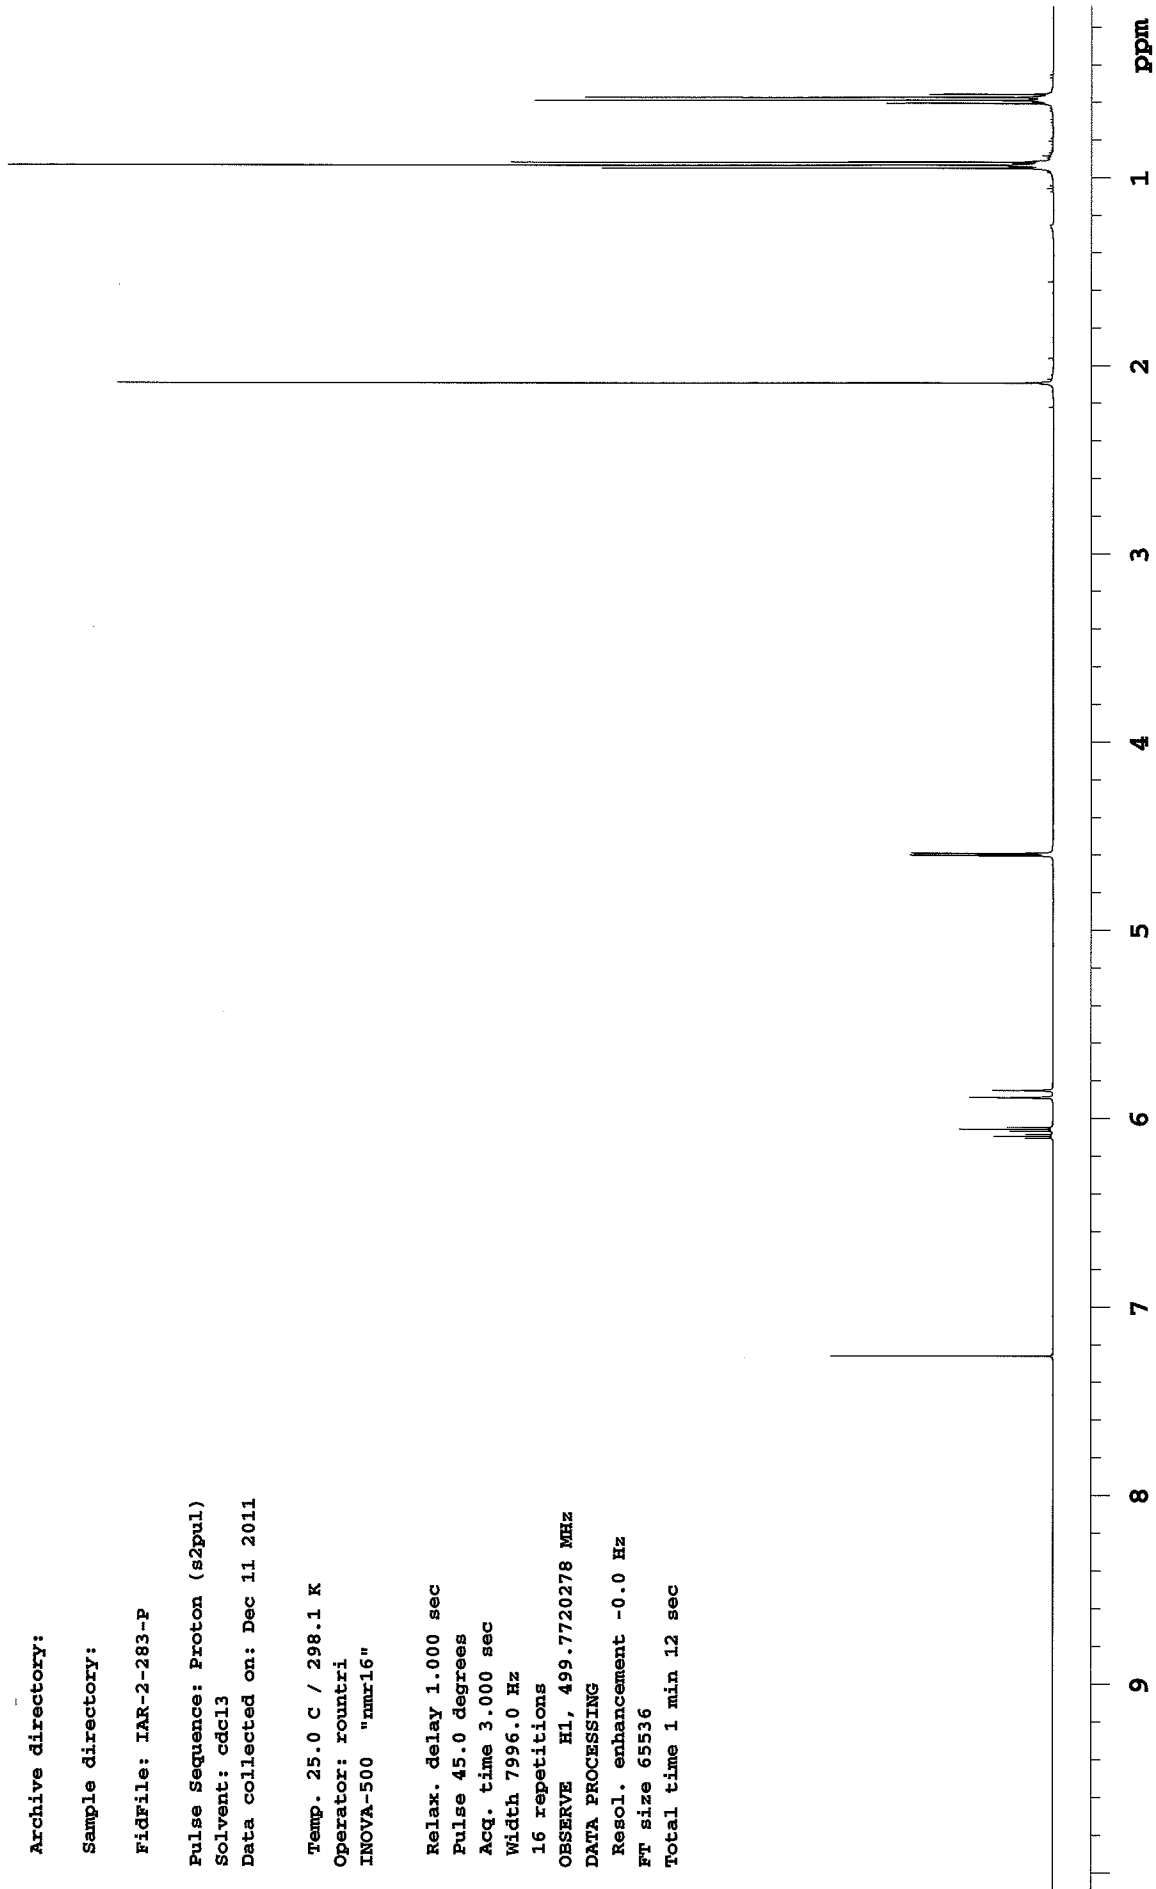

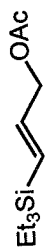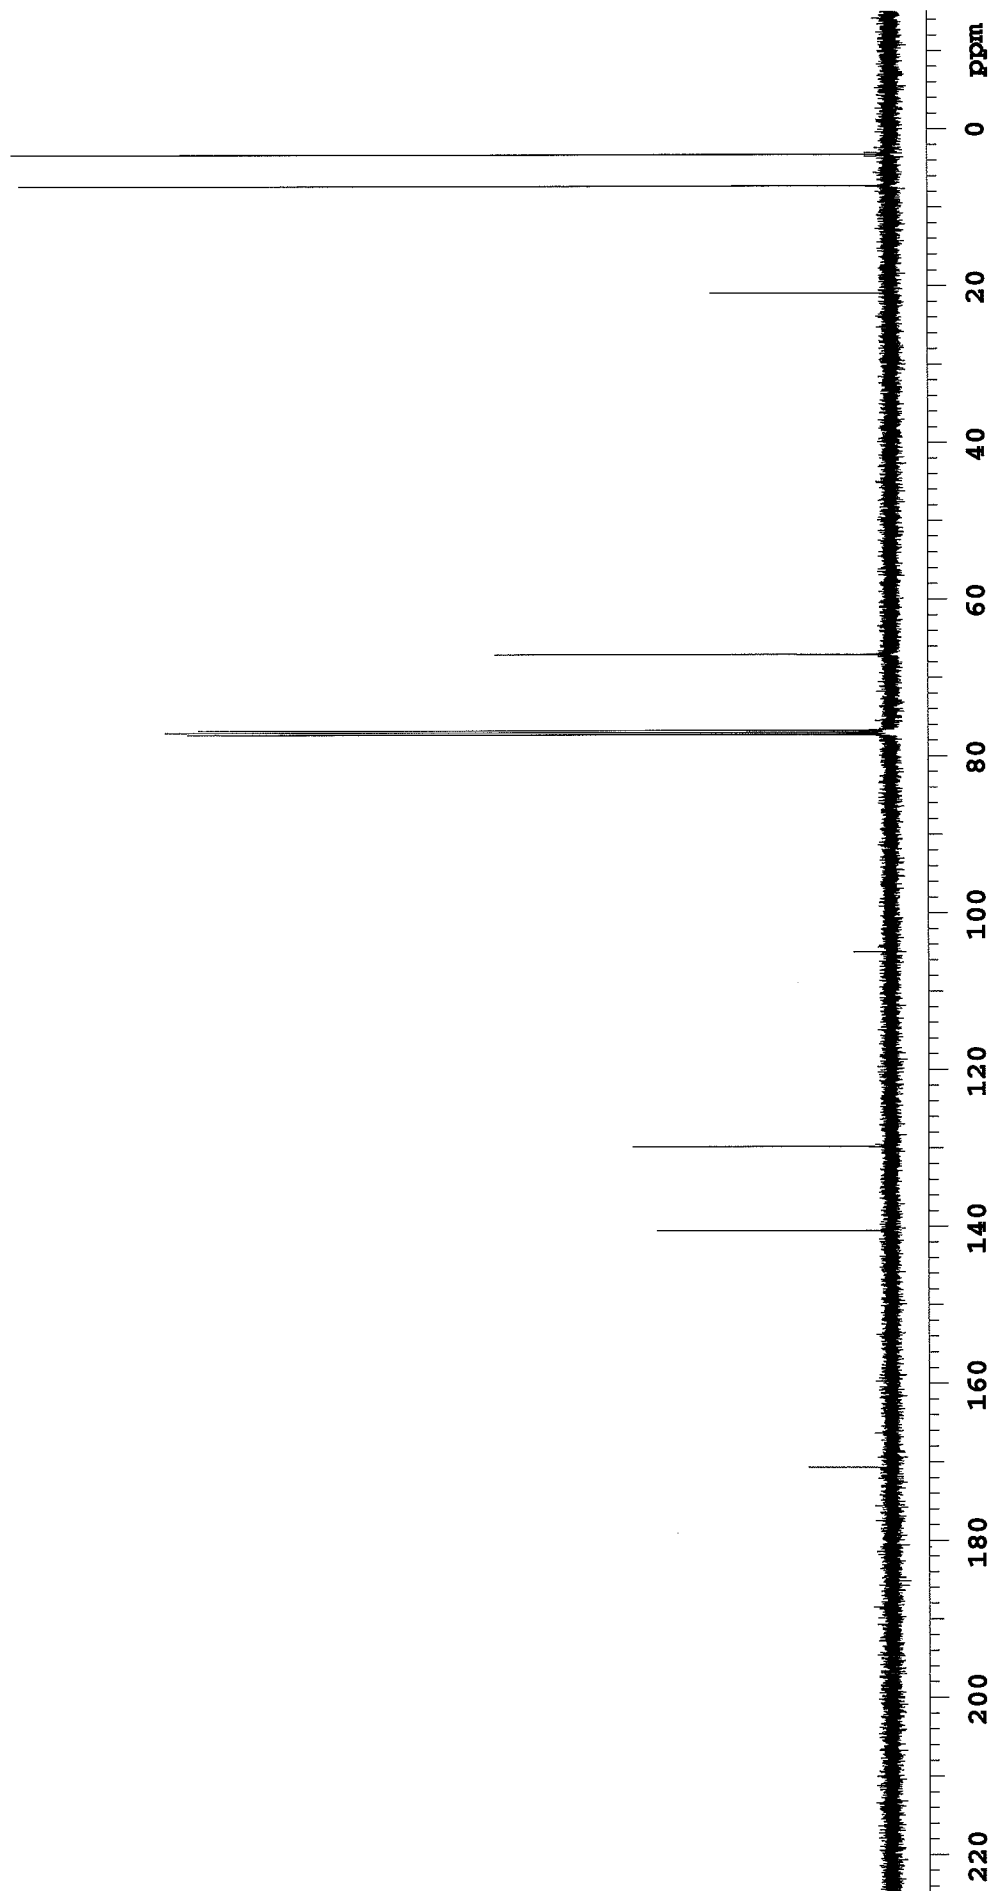

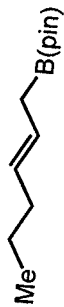

Sample directory:

File: IAR-1-79-2-Characterized\_1\_79\_01

Pulse Sequence: Proton (s2pul)

Solvent: cdcl3

Data collected on: Jul 14 2010

Temp. 25.0 C / 298.1 K

Sample #2, Operator: zhangpa

INOVA-500 "nmr16"

Relax. delay 1.000 sec

Pulse 45.0 degrees

Acq. time 2.049 sec

Width 6410.3 Hz

32 repetitions

OBSERVE H1, 399.7662927 MHz

DATA PROCESSING

Resol. enhancement -0.0 Hz

FT size 65536

Total time 1 min 44 sec

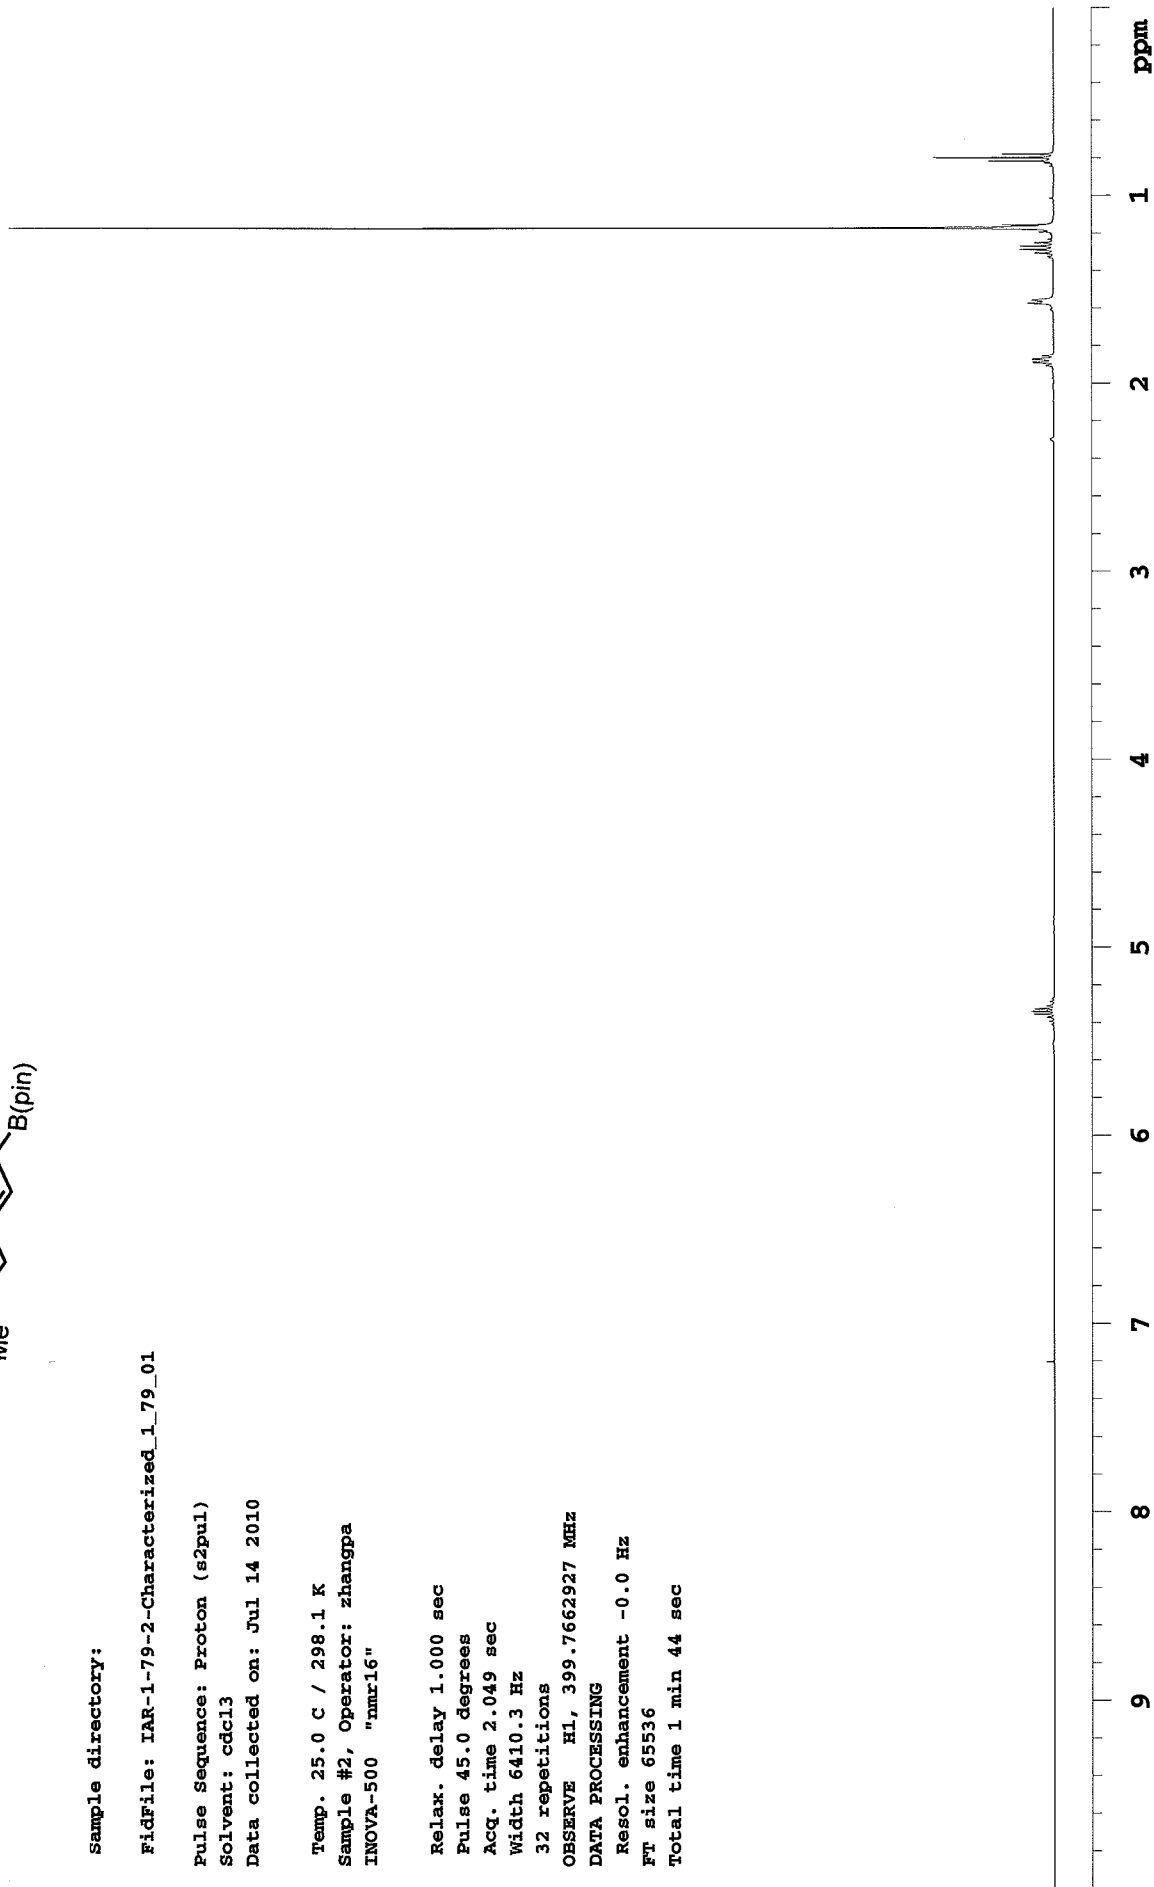

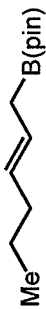

Archive directory:

Sample directory:

File: IAR-1-79-2-Characterized\_1\_79\_02

Pulse Sequence: Carbon (s2pul)

Solvent: cdcl3

Data collected on: Jul 14 2010

Temp. 25.0 C / 298.1 K

Sample #2, Operator: zhangpa

INOVA-500 "nmr16"

Relax. delay 1.000 sec

Pulse 45.0 degrees

Acq. time 1.300 sec

Width 24509.8 Hz

256 repetitions

OBSERVE C13, 100.5213103 MHz

DECOUPLE H1, 399.7682756 MHz

Power 40 dB

continuously on

WALTZ-16 modulated

DATA PROCESSING

Line broadening 0.5 Hz

FT size 65536

Total time 9 min 49 sec

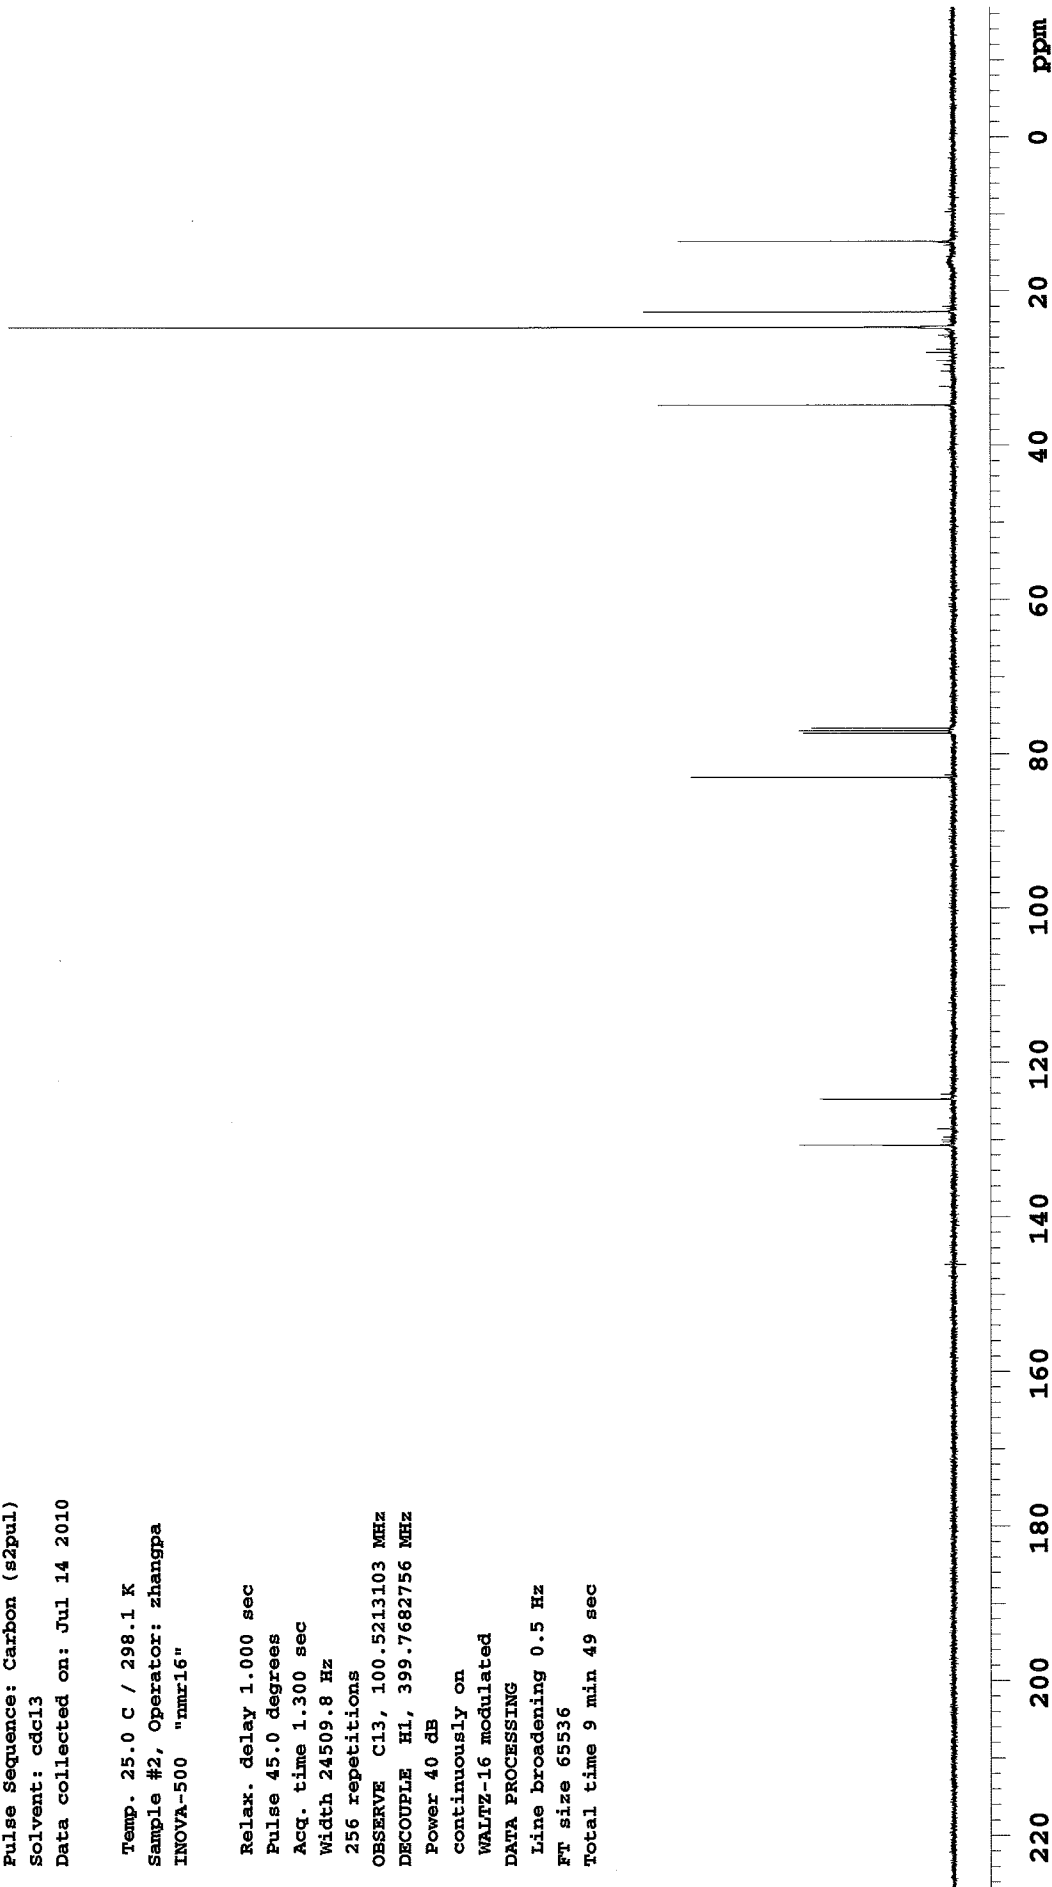

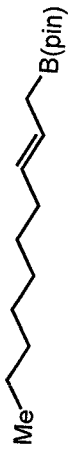

IAR-1-161-P3

Archive directory:

Sample directory:

FidFile: IAR-1-161-P3

Pulse Sequence: Proton (s2pul)

Solvent: cdc13

Data collected on: Sep 27 2010

Temp. 25.0 C / 298.1 K

Operator: roundtri

INOVA-500 "nmr16"

Relax. delay 1.000 sec

Pulse 45.0 degrees

Acq. time 2.049 sec

Width 8012.8 Hz

16 repetitions

OBSERVE H1, 499.88023 MHz

DATA PROCESSING

Resol. enhancement -0.0 Hz

FT size 65536

Total time 0 min 55 sec

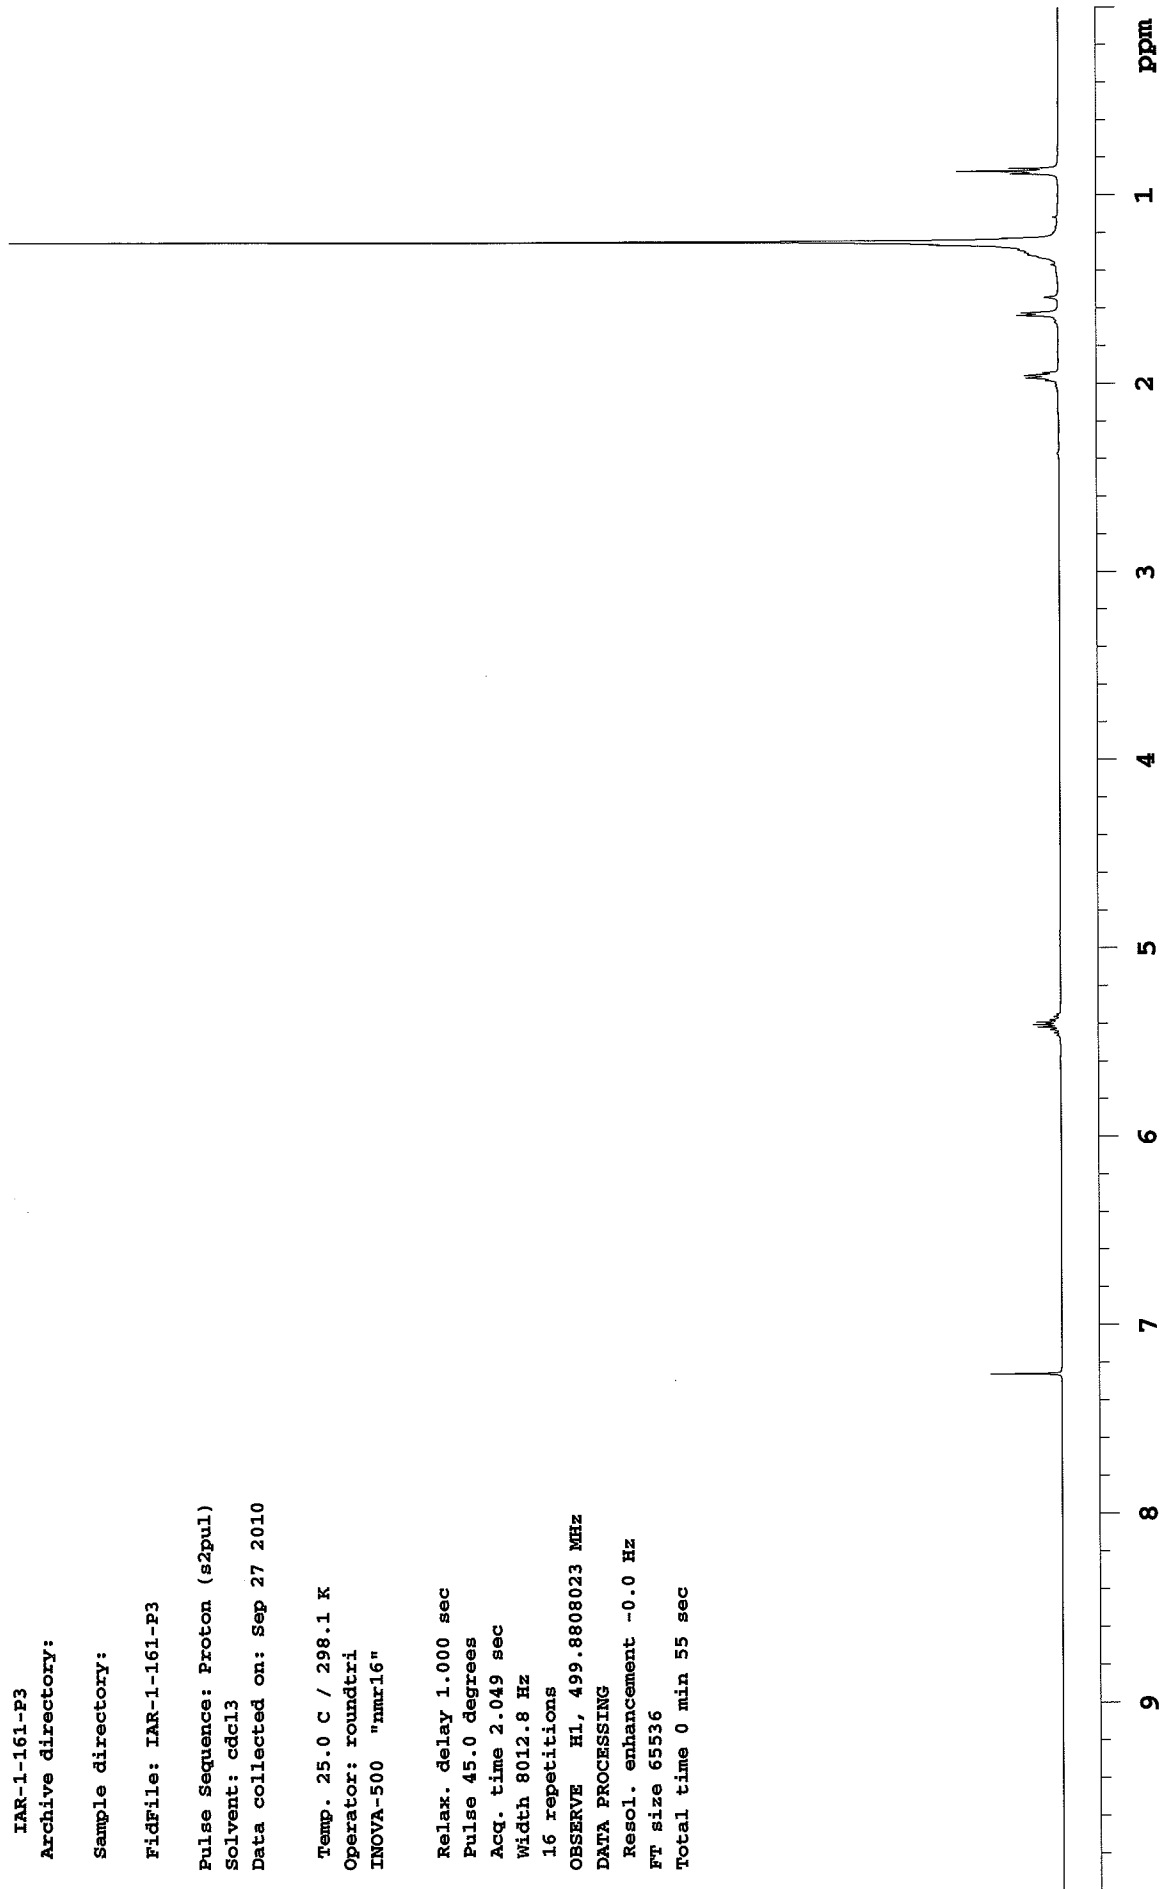

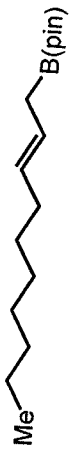

Sample directory:

File: IAR-1-161-P-C13\_1\_161\_01

Pulse Sequence: Carbon (s2pul)

Solvent: cdcl3

Data collected on: Sep 21 2010

Temp. 25.0 C / 298.1 K

Sample #21, Operator: zhangpa  
INOVA-500 "nmr16"

Relax. delay 1.000 sec

Pulse 45.0 degrees

Acq. time 1.300 sec

Width 24509.8 Hz

256 repetitions

OBSERVE C13, 100.5213080 MHz

DECOUPLE H1, 399.7682756 MHz

Power 40 dB

continuously on

WALTZ-16 modulated

DATA PROCESSING

Line broadening 0.5 Hz

FT size 65536

Total time 9 min 49 sec

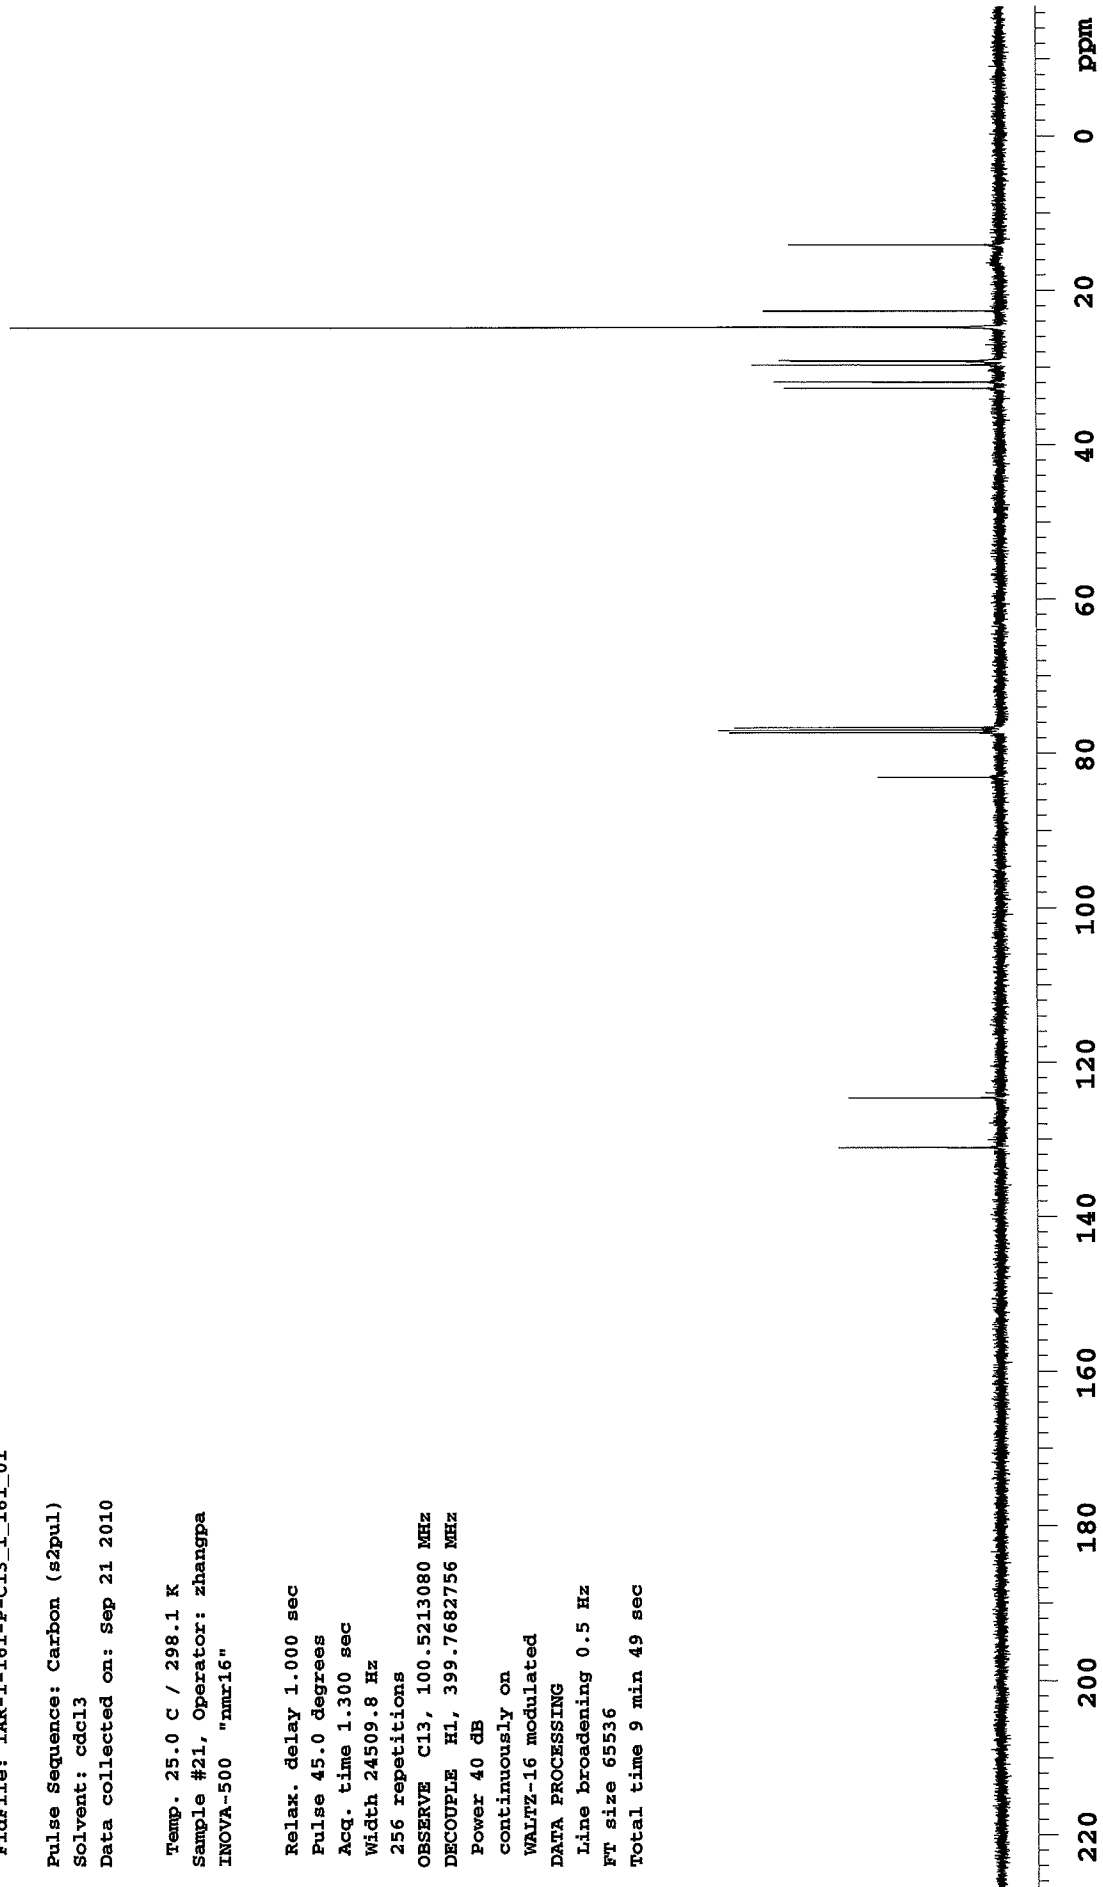

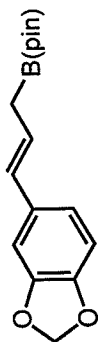

Temp. 25.0 C / 298.1 K  
Operator: roundtri  
INOVA-500 "nmr16"

Relax. delay 1.000 sec  
Pulse 45.0 degrees  
Acq. time 2.049 sec  
Width 8012.8 Hz  
16 repetitions  
OBSERVE H1, 499.8808006 MHz  
DATA PROCESSING  
Resol. enhancement -0.0 Hz  
Ft size 65536  
Total time 0 min 55 sec

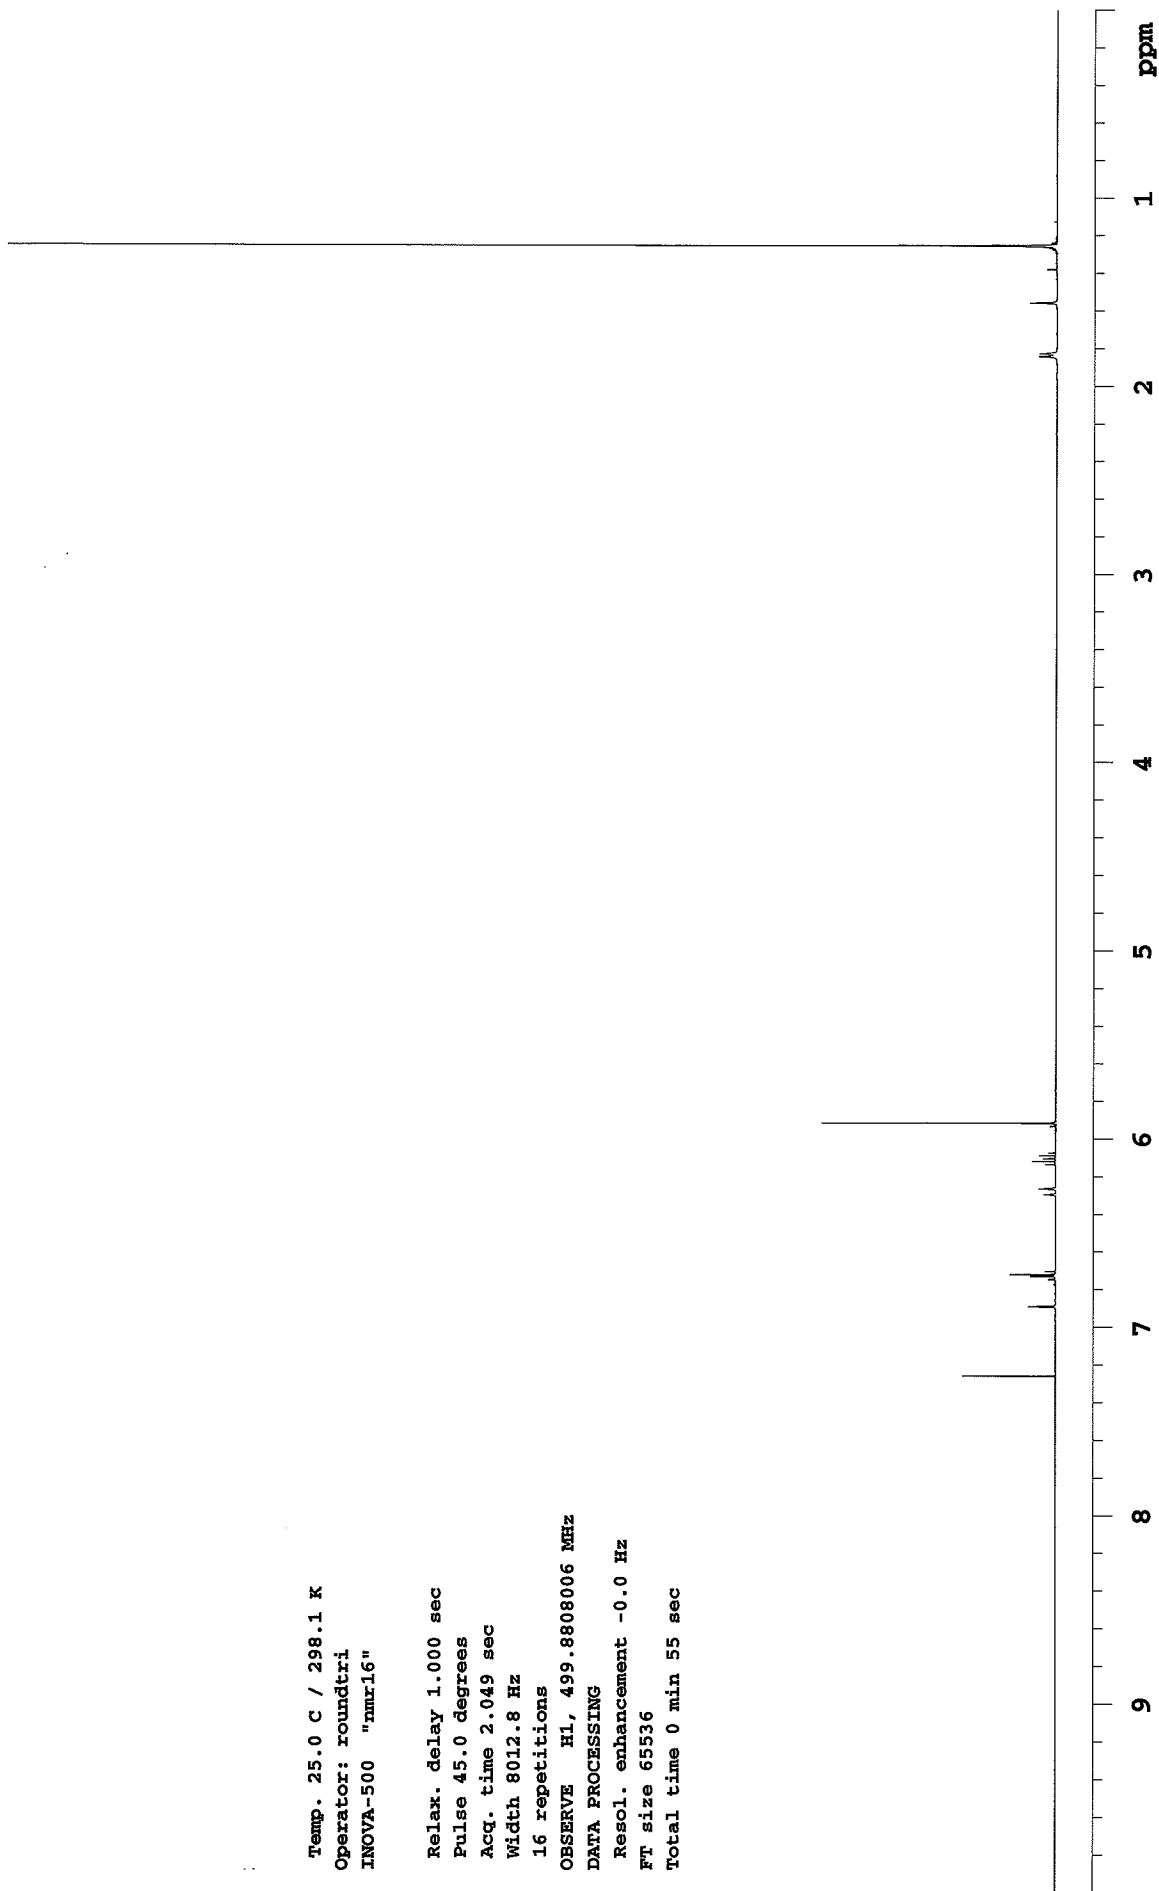



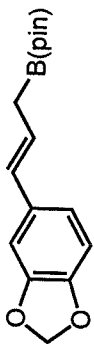

Temp. 25.0 C / 298.1 K  
Sample #29, Operator: zhangpa  
INOVA-500 "nmr16"

Relax. delay 1.000 sec  
Pulse 45.0 degrees  
Acq. time 1.300 sec  
Width 24509.8 Hz  
10000 repetitions  
OBSERVE C13, 100.5213087 MHz  
DECOUPLE H1, 399.7682756 MHz  
Power 40 dB  
continuously on  
WALTZ-16 modulated  
DATA PROCESSING  
Line broadening 0.5 Hz  
FT size 65536  
Total time 6 hr, 23 min

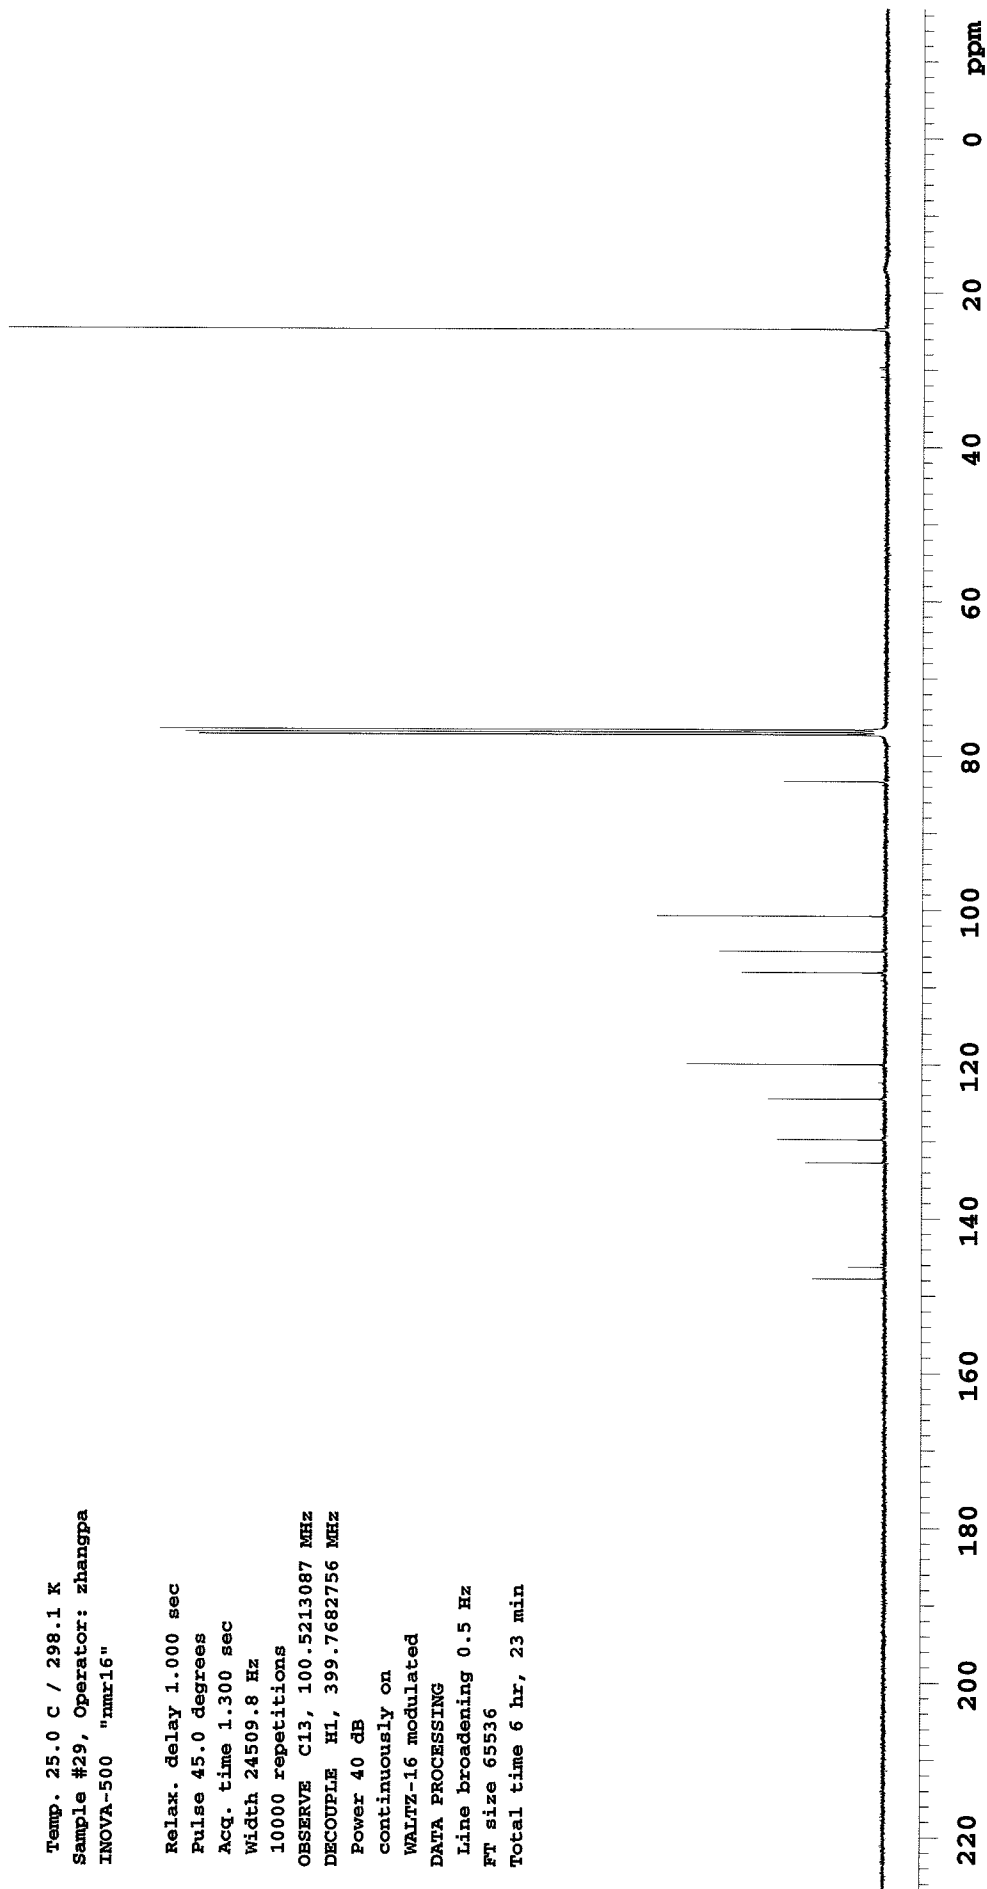

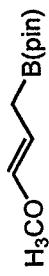

Temp. 25.0 C / 298.1 K  
Sample #36, Operator: zhangpa  
INOVA-500 "nmr15"

Relax. delay 1.000 sec  
Pulse 45.0 degrees  
Acq. time 2.049 sec  
Width 6410.3 Hz  
16 repetitions  
OBSERVE H1, 399.7662700 MHZ  
DATA PROCESSING  
Resol. enhancement -0.0 Hz  
Ft size 65536  
Total time 0 min 55 sec

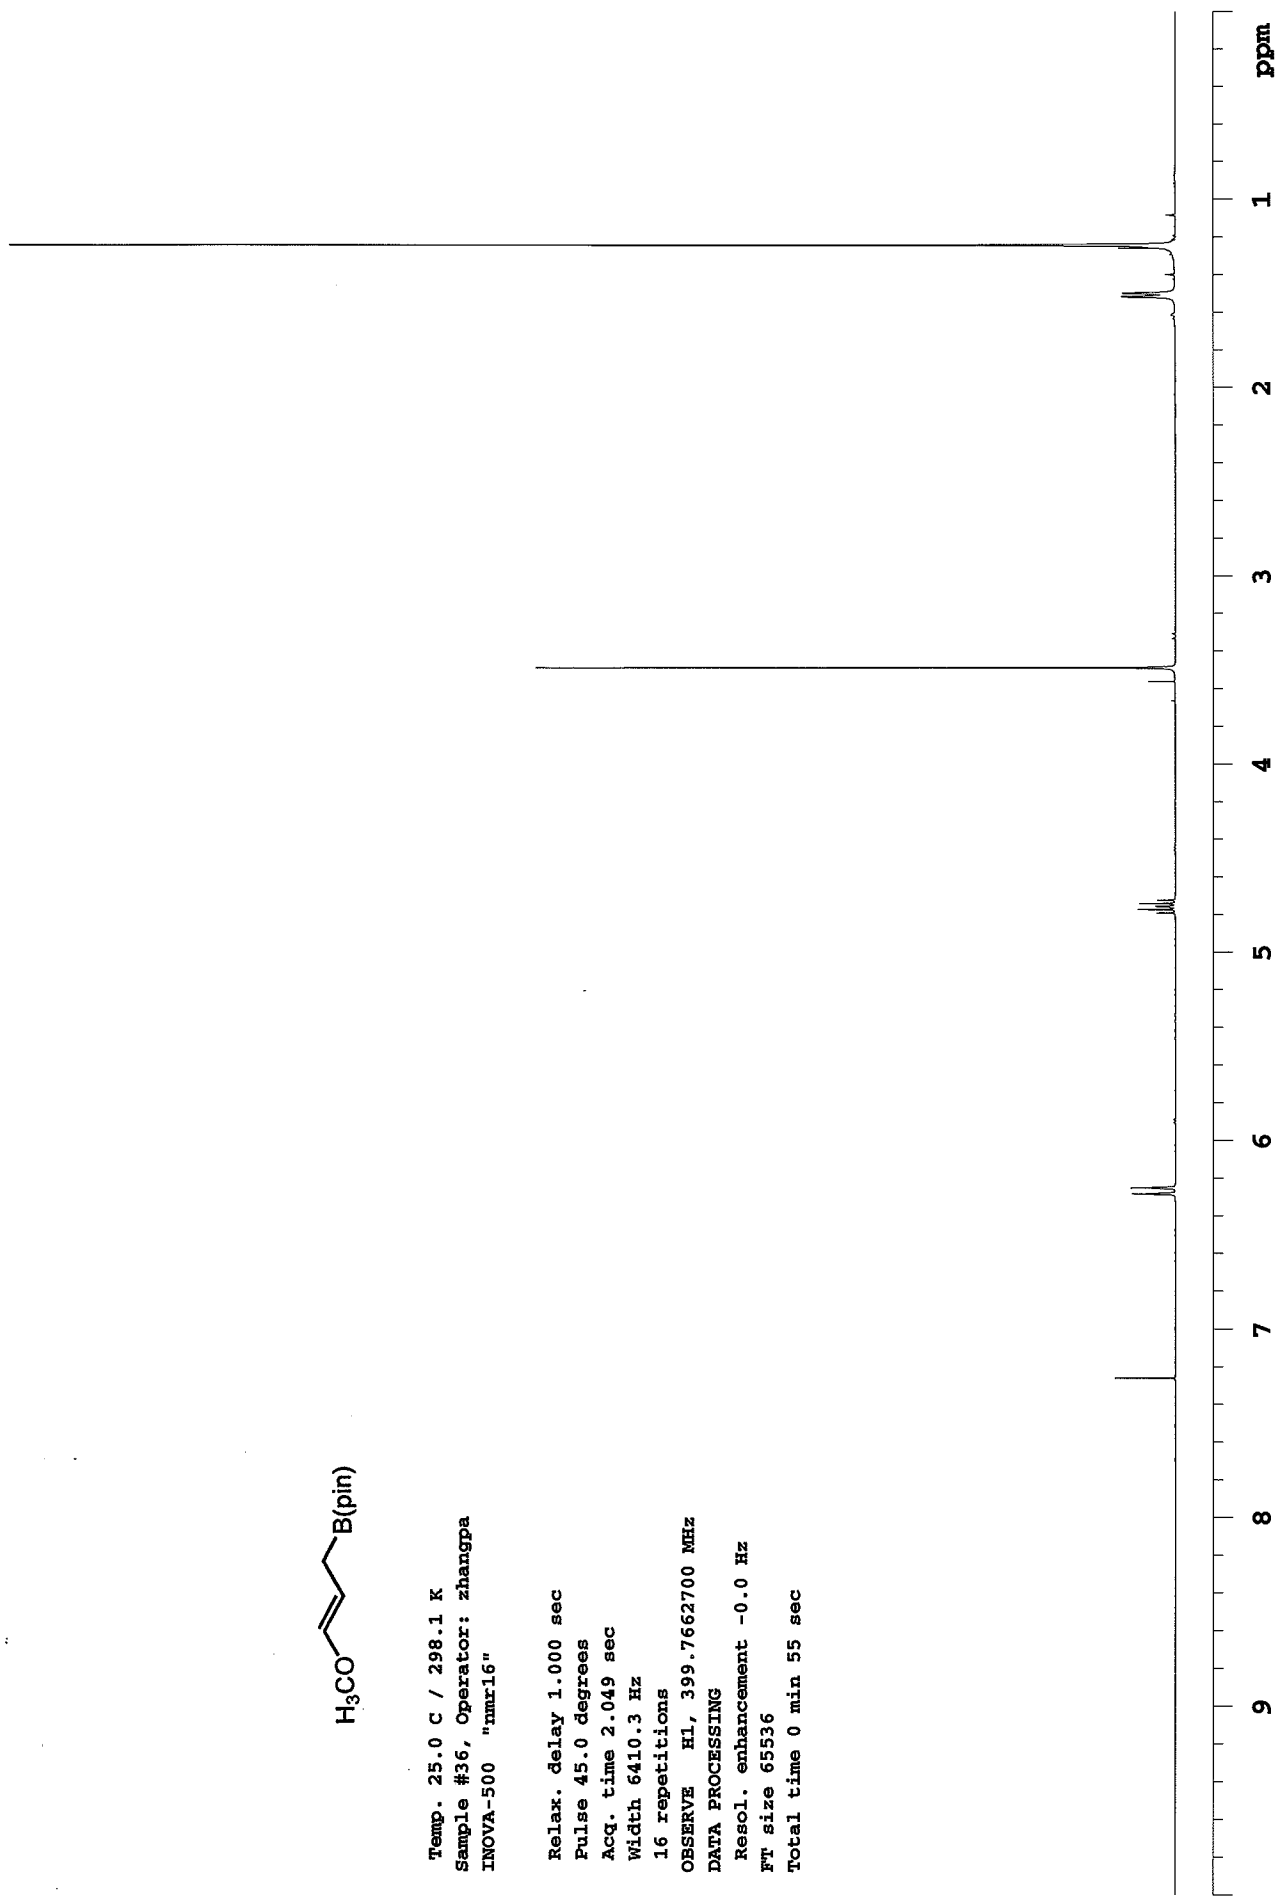

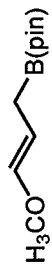

Temp. 25.0 C / 298.1 K  
Sample #36, Operator: zhangpa  
INOVA-500 "nmr16"

Relax. delay 1.000 sec  
Pulse 45.0 degrees  
Acq. time 1.300 sec  
Width 24509.8 Hz  
512 repetitions  
OBSERVE C13, 100.5213087 MHZ  
DECOUPLE H1, 399.7682756 MHZ  
Power 40 dB  
continuously on  
WALTZ-16 modulated  
DATA PROCESSING  
Line broadening 0.5 Hz  
Ft size 65536  
Total time 19 min

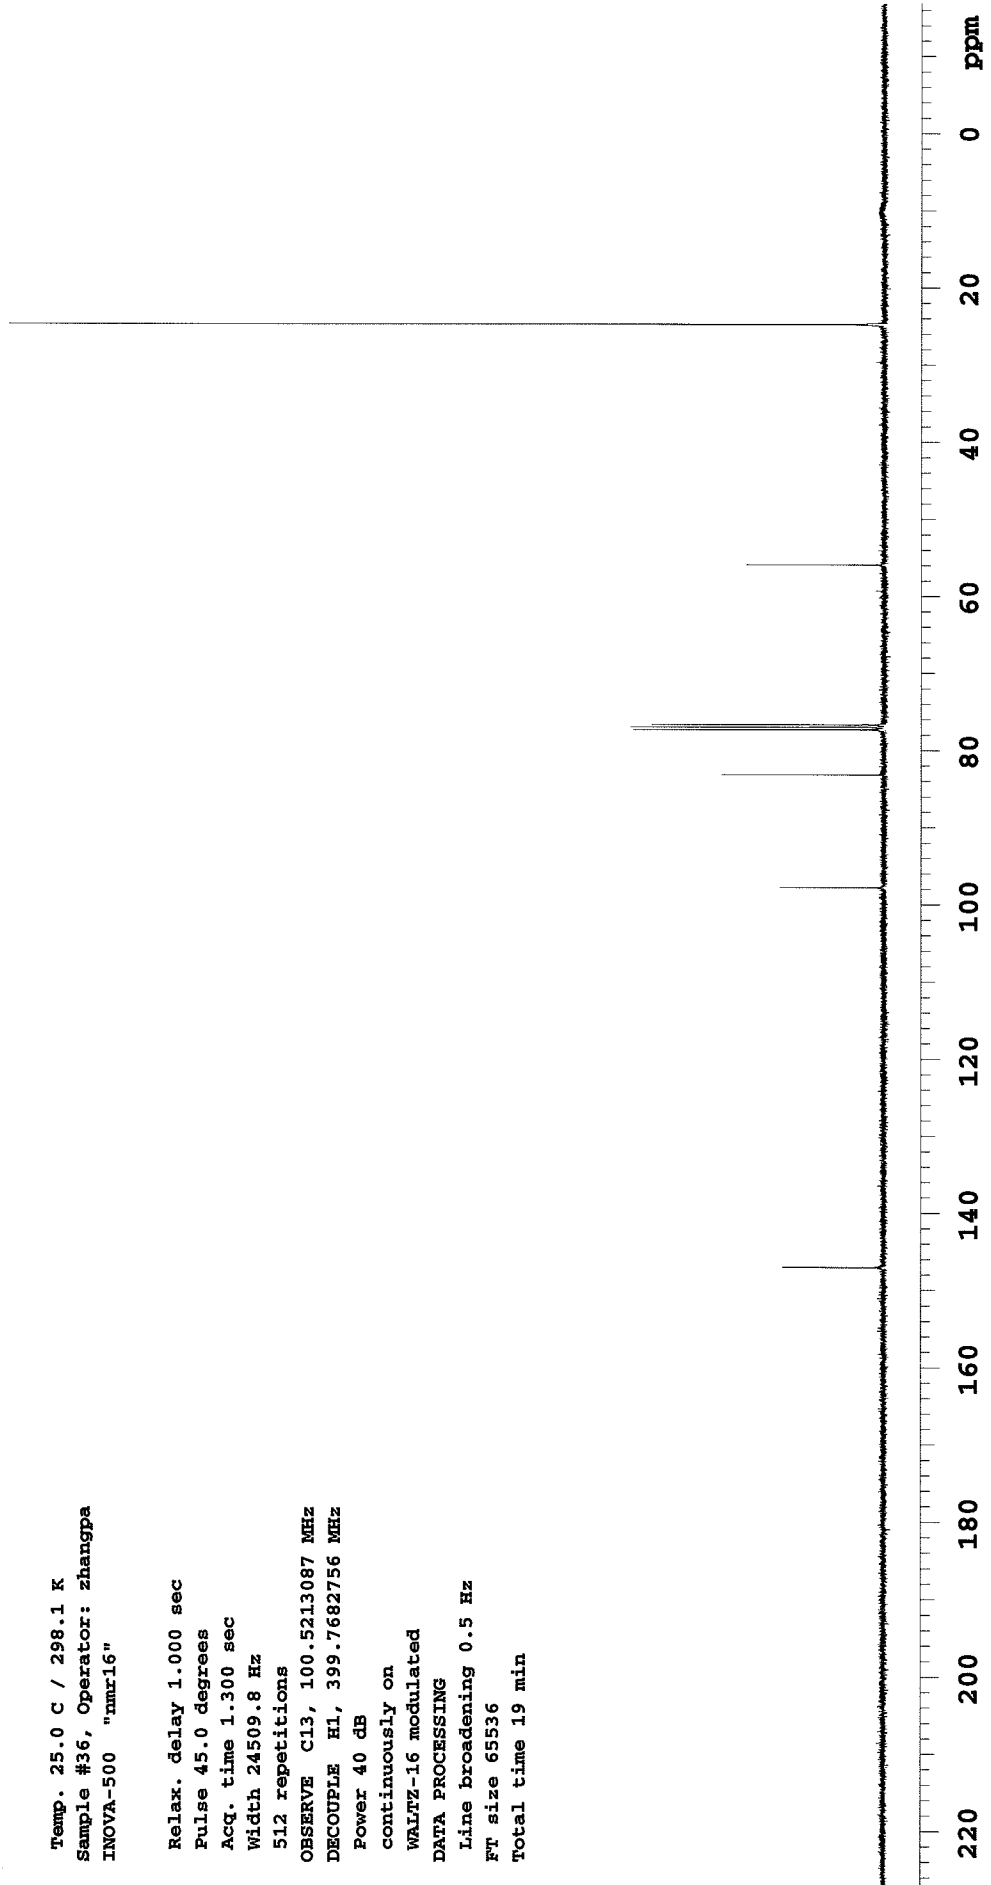

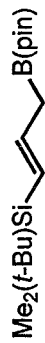

Pulse Sequence: Proton (s2pul)  
 Solvent: cdcl3  
 Data collected on: Sep 7 2010

Temp. 25.0 C / 298.1 K  
 Operator: jpm  
 INOVA-500 "nmr16"

Relax. delay 1.000 sec  
 Pulse 45.0 degrees  
 Acq. time 3.000 sec  
 Width 7996.0 Hz  
 10 repetitions

OBSERVE H1, 499.7720264 MHz  
 DATA PROCESSING  
 Resol. enhancement -0.0 Hz  
 FT size 65536  
 Total time 4 min 24 sec

Z E E Z  
 ↓ ↓ ↓ ↓

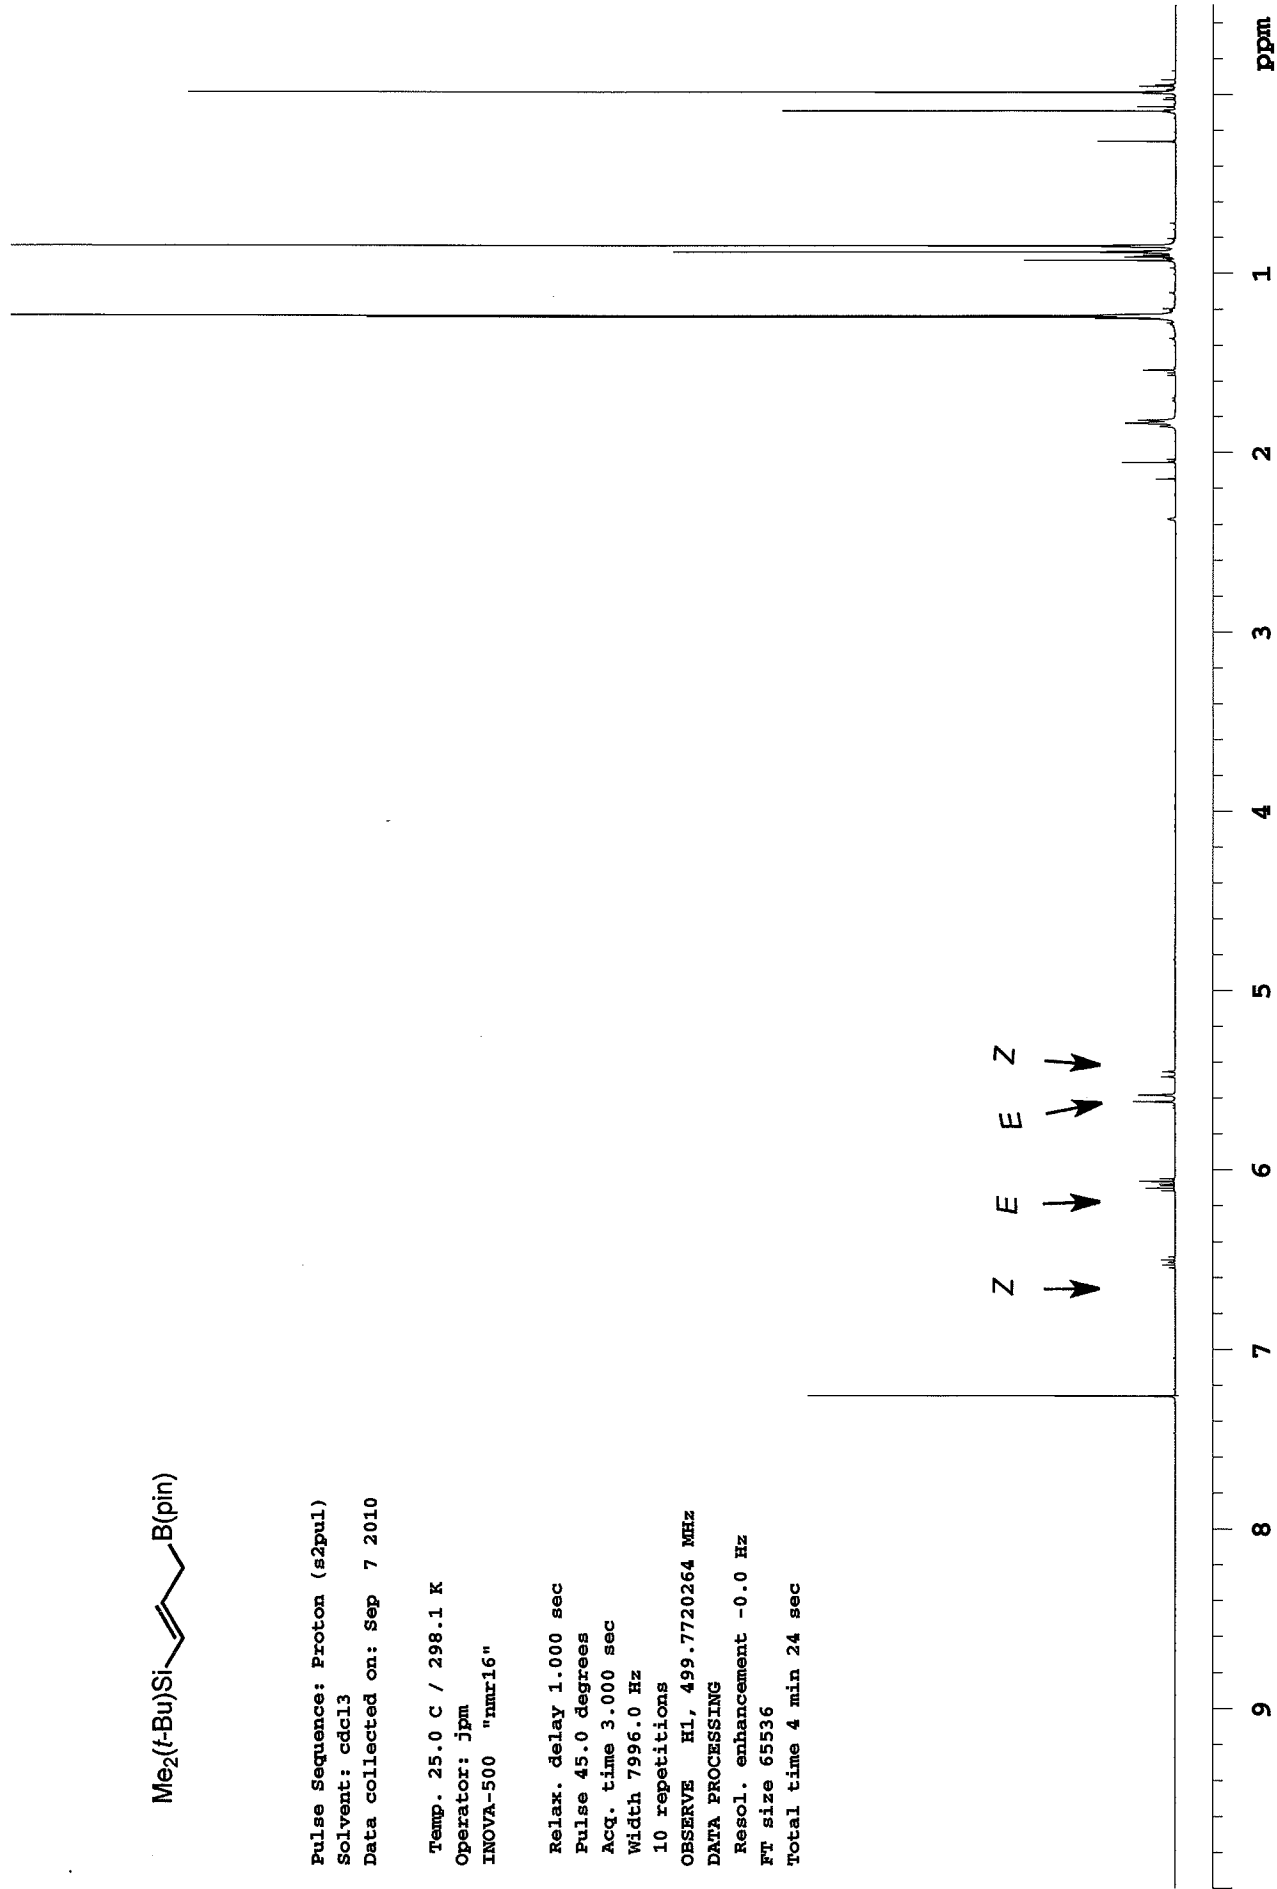

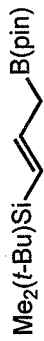

Pulse Sequence: Carbon (s2pul)  
Solvent: cdcl3  
Data collected on: Dec 11 2011

Temp. 25.0 C / 298.1 K  
Sample #31, Operator: zhangpa  
INOVA-500 "nmr16"

Relax. delay 1.000 sec  
Pulse 45.0 degrees  
Acq. time 1.300 sec  
Width 24509.8 Hz  
15000 repetitions  
OBSERVE C13, 100.5213080 MHz  
DECOUPLE H1, 399.7682756 MHz  
Power 39 dB  
continuously on  
WALTZ-16 modulated  
DATA PROCESSING  
Line broadening 0.5 Hz  
Ft size 65536  
Total time 9 hr, 35 min

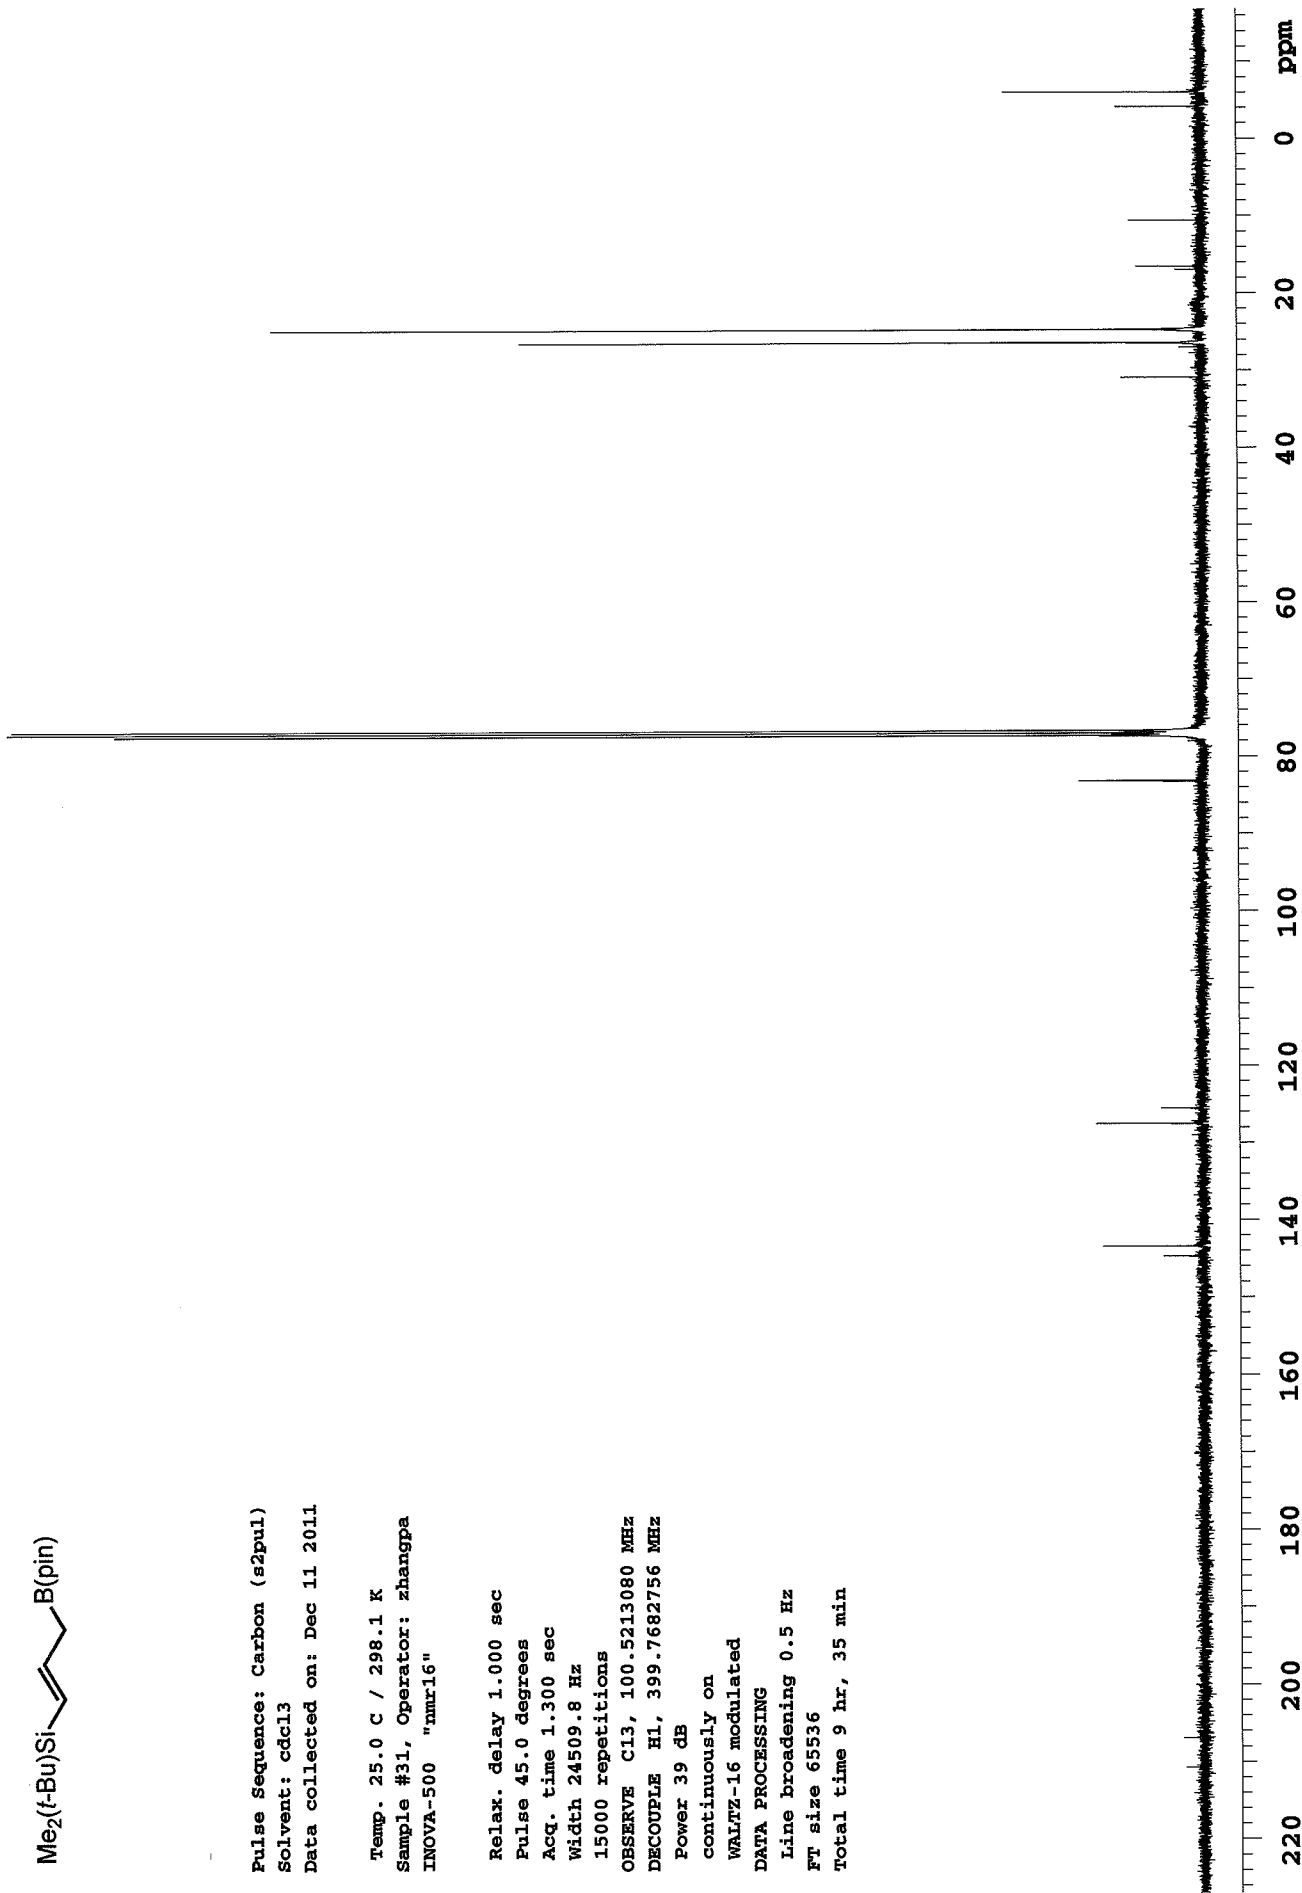

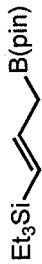

Pulse Sequence: Proton (s2pul)  
Solvent: cdcl3  
Data collected on: Mar 31 2011

Temp. 25.0 C / 298.1 K  
Operator: kyner  
INOVA-500 "nmr16"

Relax. delay 1.000 sec  
Pulse 45.0 degrees  
Acq. time 2.049 sec  
Width 8012.8 Hz  
16 repetitions  
OBSERVE H1, 499.8808028 MHz  
DATA PROCESSING  
Resol. enhancement -0.0 Hz  
Ft size 65536  
Total time 0 min 55 sec

Z E E Z  
↓ ↓ ↓ ↓

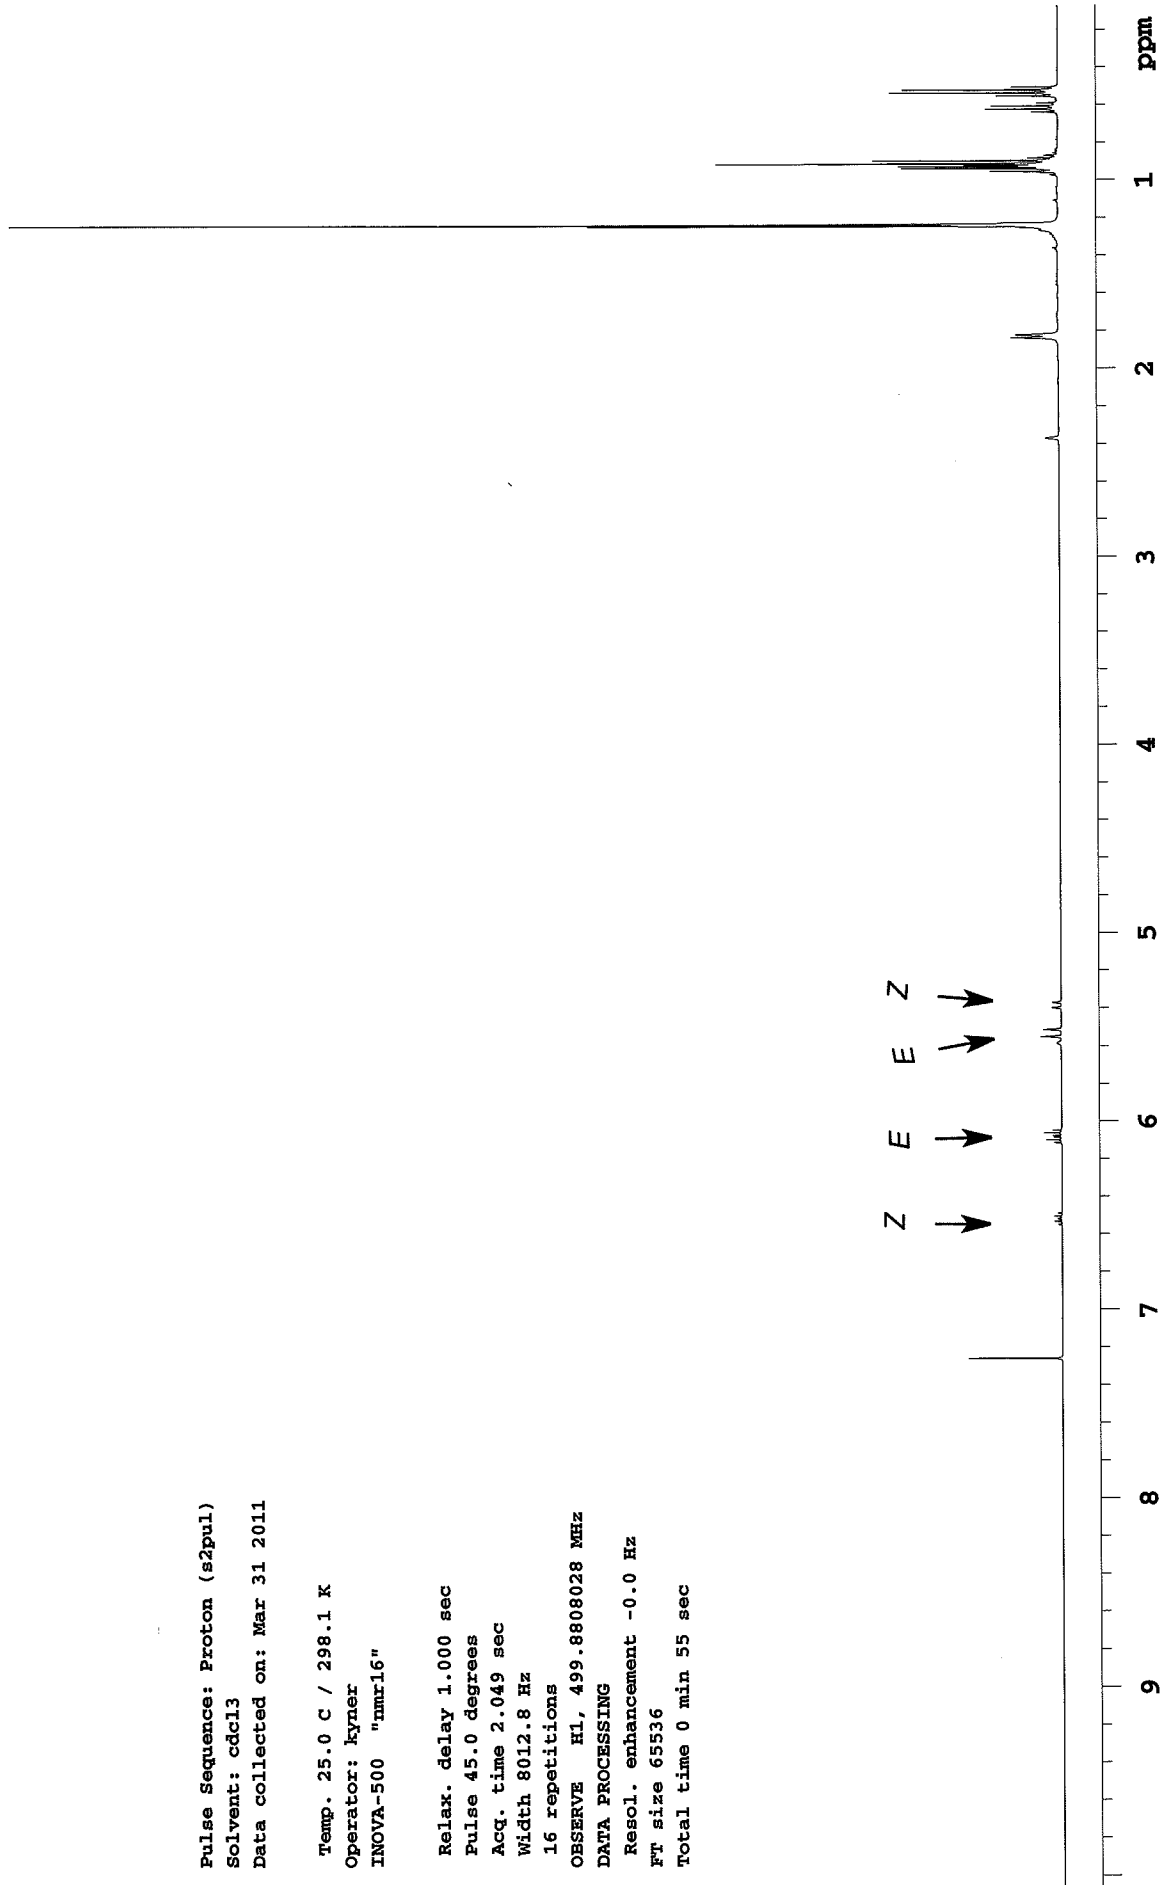

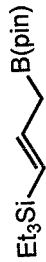

SAMPLE SPECIAL  
 date Apr 1 2011 temp 25.0  
 solvent cdcl3 gain 30  
 file /home/all/jjm~ spin 20  
 /IAR/IAR-2-81-P3-C~ hst 0.008  
 13.fid pw90 12.400  
 ACQUISITION alfa 6.600  
 sw 30165.9 FLAGS  
 at 1.300 il n  
 np 78460 in n  
 fb 17000 dp y  
 bs 64 hs nn  
 dl 1.000 PROCESSING  
 nt 5000 lb 0.50  
 ct 1088 fn not used  
 TRANSMITTER DISPLAY  
 tn C13 sp -2336.9  
 sfrq 125.681 wp 30165.5  
 tof 1285.2 rfl 2337.4  
 tpwr 57 rfp 0  
 pw 6.200 rp 24.7  
 DECOUPLER lp -177.2  
 dn H1 PLOT  
 dof 0 wc 250  
 dm YYY sc 0  
 dnm w vs 14599  
 dpwr 45 th 4  
 dmf 11800 ai cdc ph

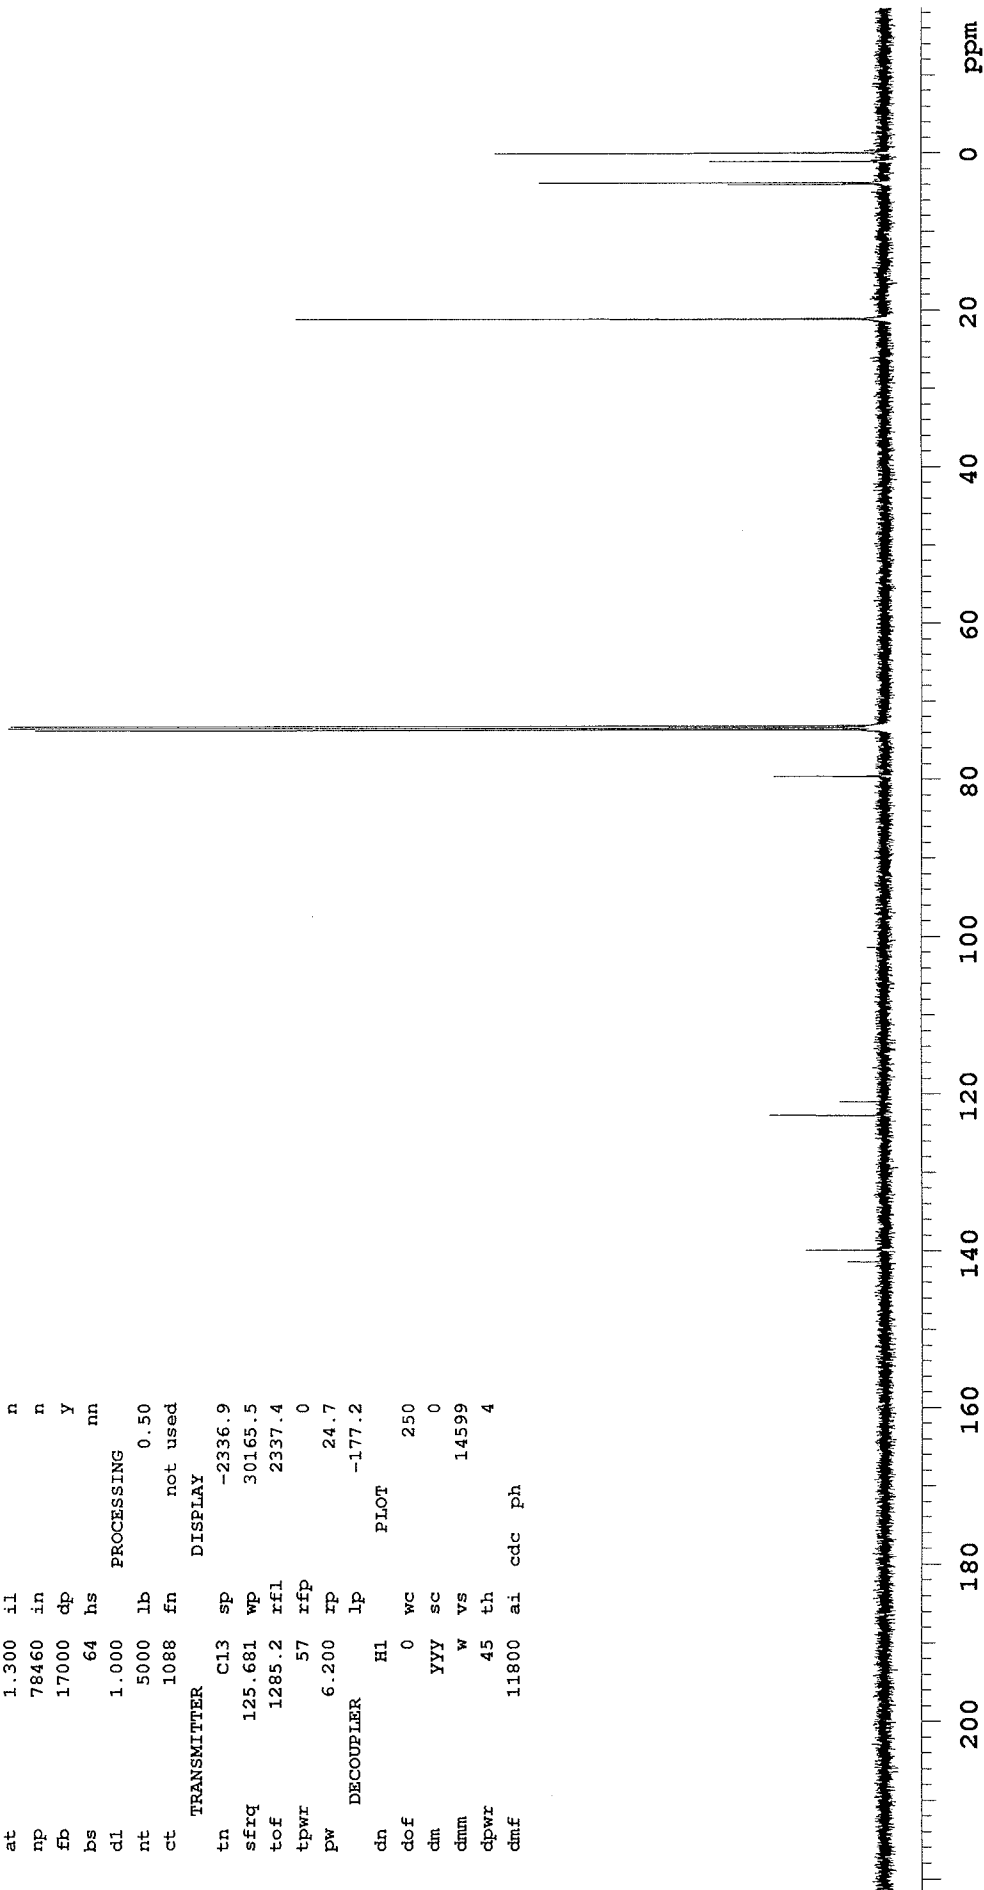

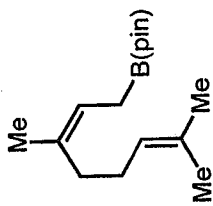

Temp. 25.0 C / 298.1 K  
Operator: jpm  
INOVA-500 "nmr16"

Relax. delay 1.000 sec  
Pulse 45.0 degrees  
Acq. time 3.000 sec  
Width 7996.0 Hz  
16 repetitions  
OBSERVE H1, 499.772064 MHz  
DATA PROCESSING  
Resol. enhancement -0.0 Hz  
FT size 65536  
Total time 1 min 12 sec

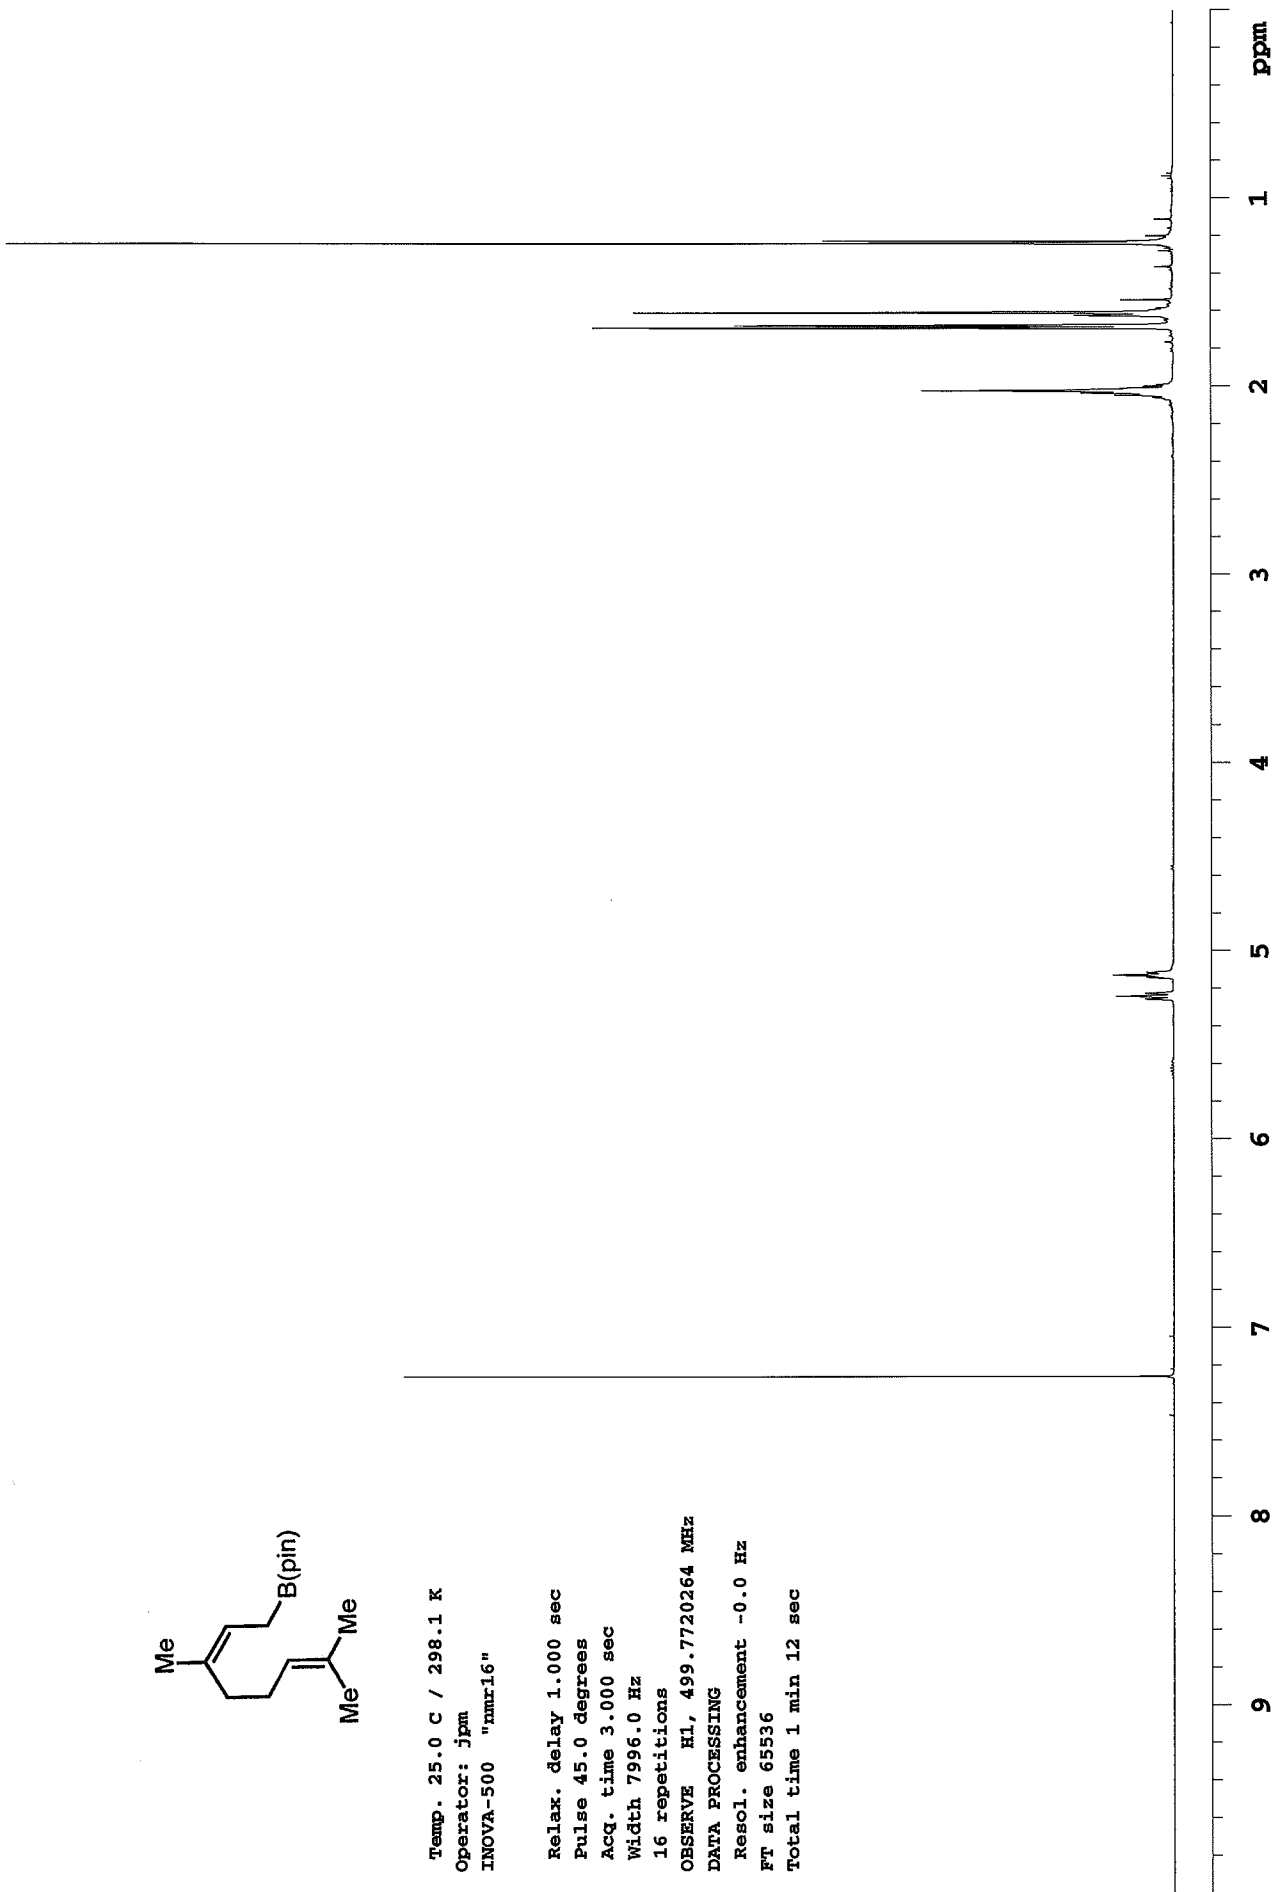



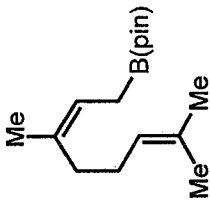

Data collected on: Dec 13 2011

Temp. 25.0 C / 298.1 K  
Operator: rountri  
INOVA-500 "nmr16"

Relax. delay 1.000 sec  
Pulse 45.0 degrees  
Acq. time 1.300 sec  
Width 30165.9 Hz  
704 repetitions  
OBSERVE C13, 125.6677754 MHz  
DECOUPLE H1, 499.7745112 MHz  
Power 45 dB  
continuously on  
WALTZ-16 modulated  
DATA PROCESSING  
Line broadening 0.5 Hz  
Ft size 131072  
Total time 1 hr, 16 min

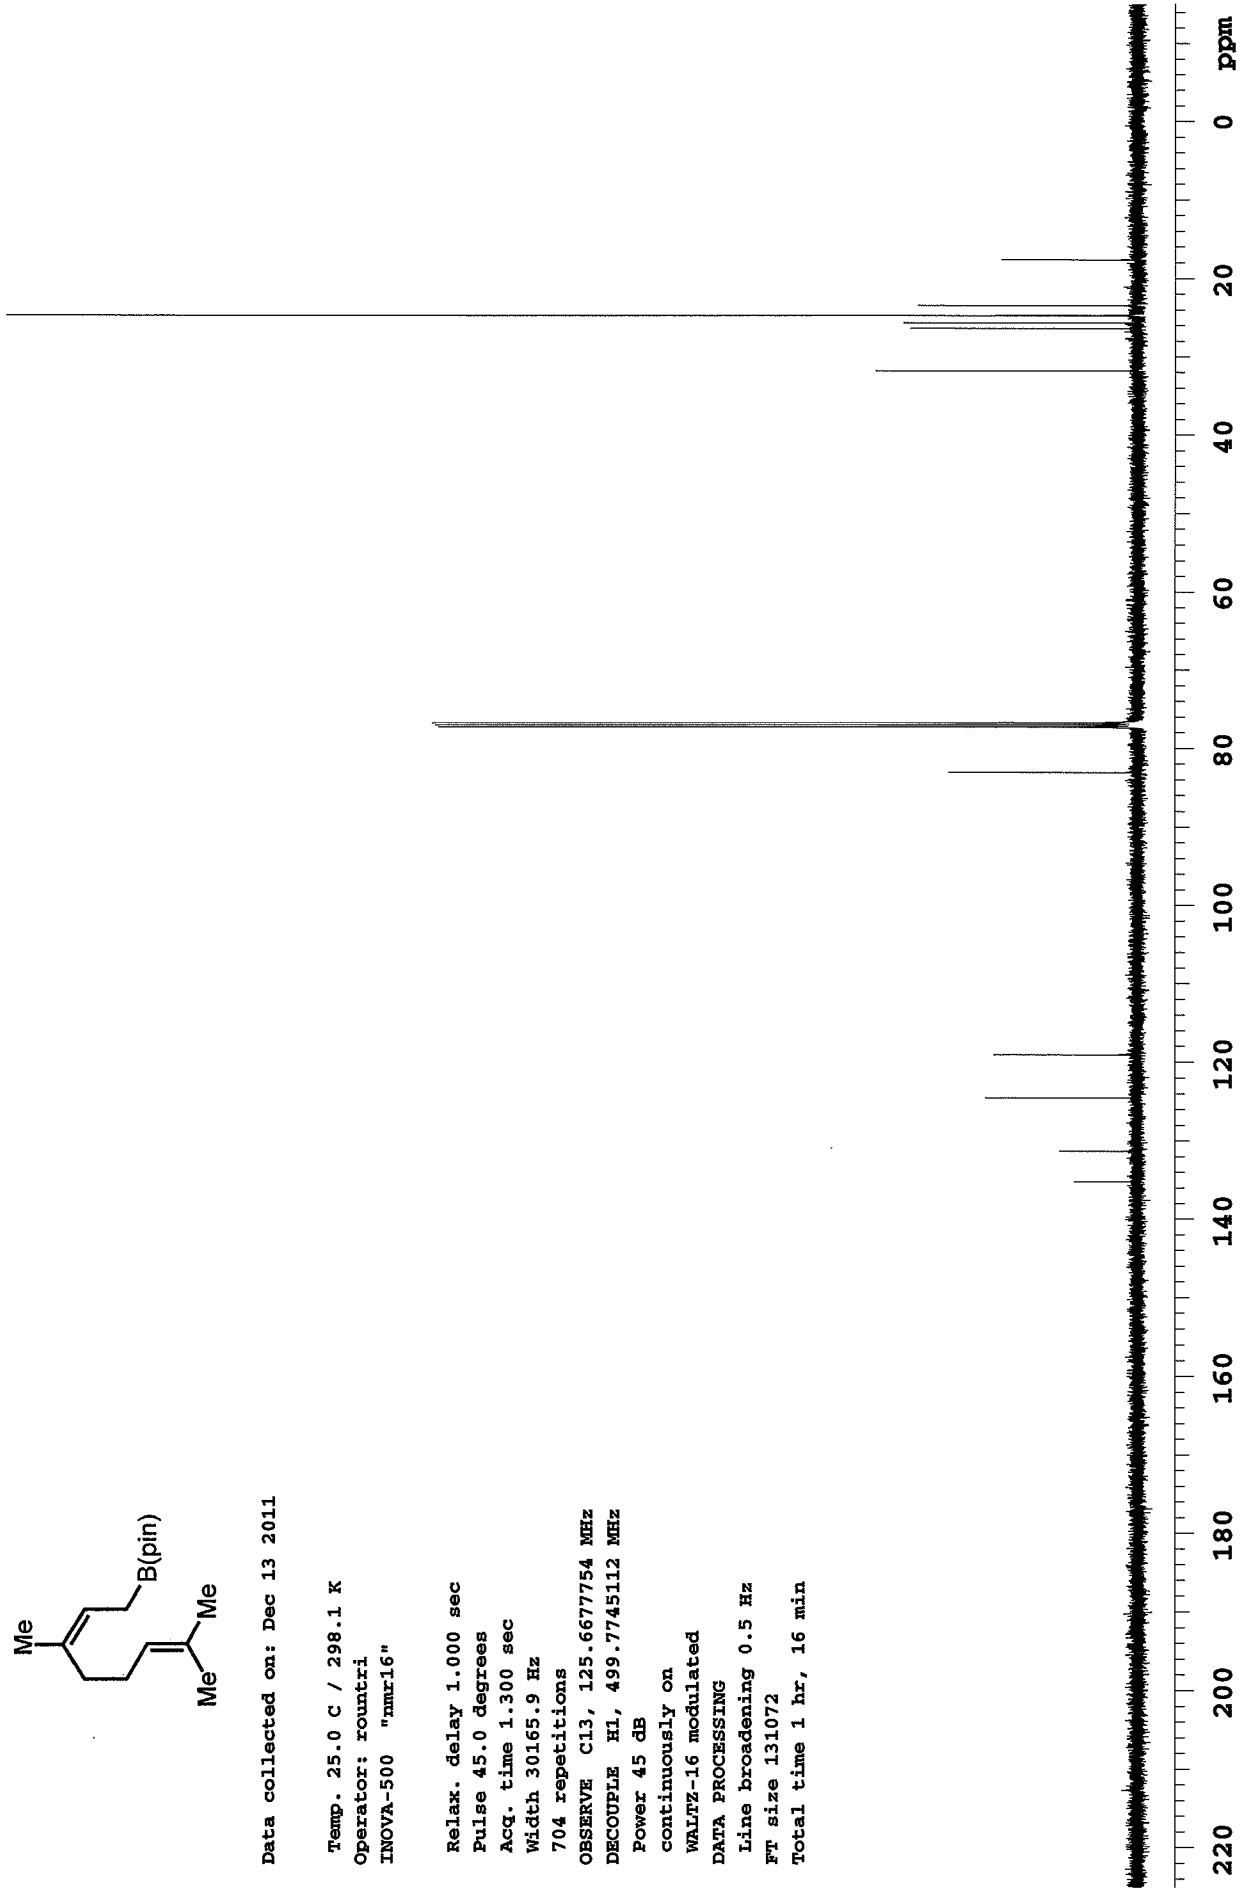

IAR-2-7-HMQC-Proton

Sample Name:

IAR-2-7-HMQC-Proton

Archive directory:

Sample directory:

FidFile: IAR-2-7-HMQC-Proton

Pulse Sequence: Proton (s2pul)

Solvent: cdcl3

Data collected on: Dec 14 2010

Temp. 25.0 C / 298.1 K

Operator: jpm

INOVA-500 "nmr16"

Relax. delay 1.000 sec

Pulse 45.0 degrees

Acq. time 3.000 sec

Width 7996.0 Hz

8 repetitions

OBSERVE H1, 499.7720259 MHz

DATA PROCESSING

Resol. enhancement -0.0 Hz

FT size 65536

Total time 0 min 40 sec

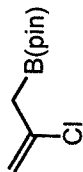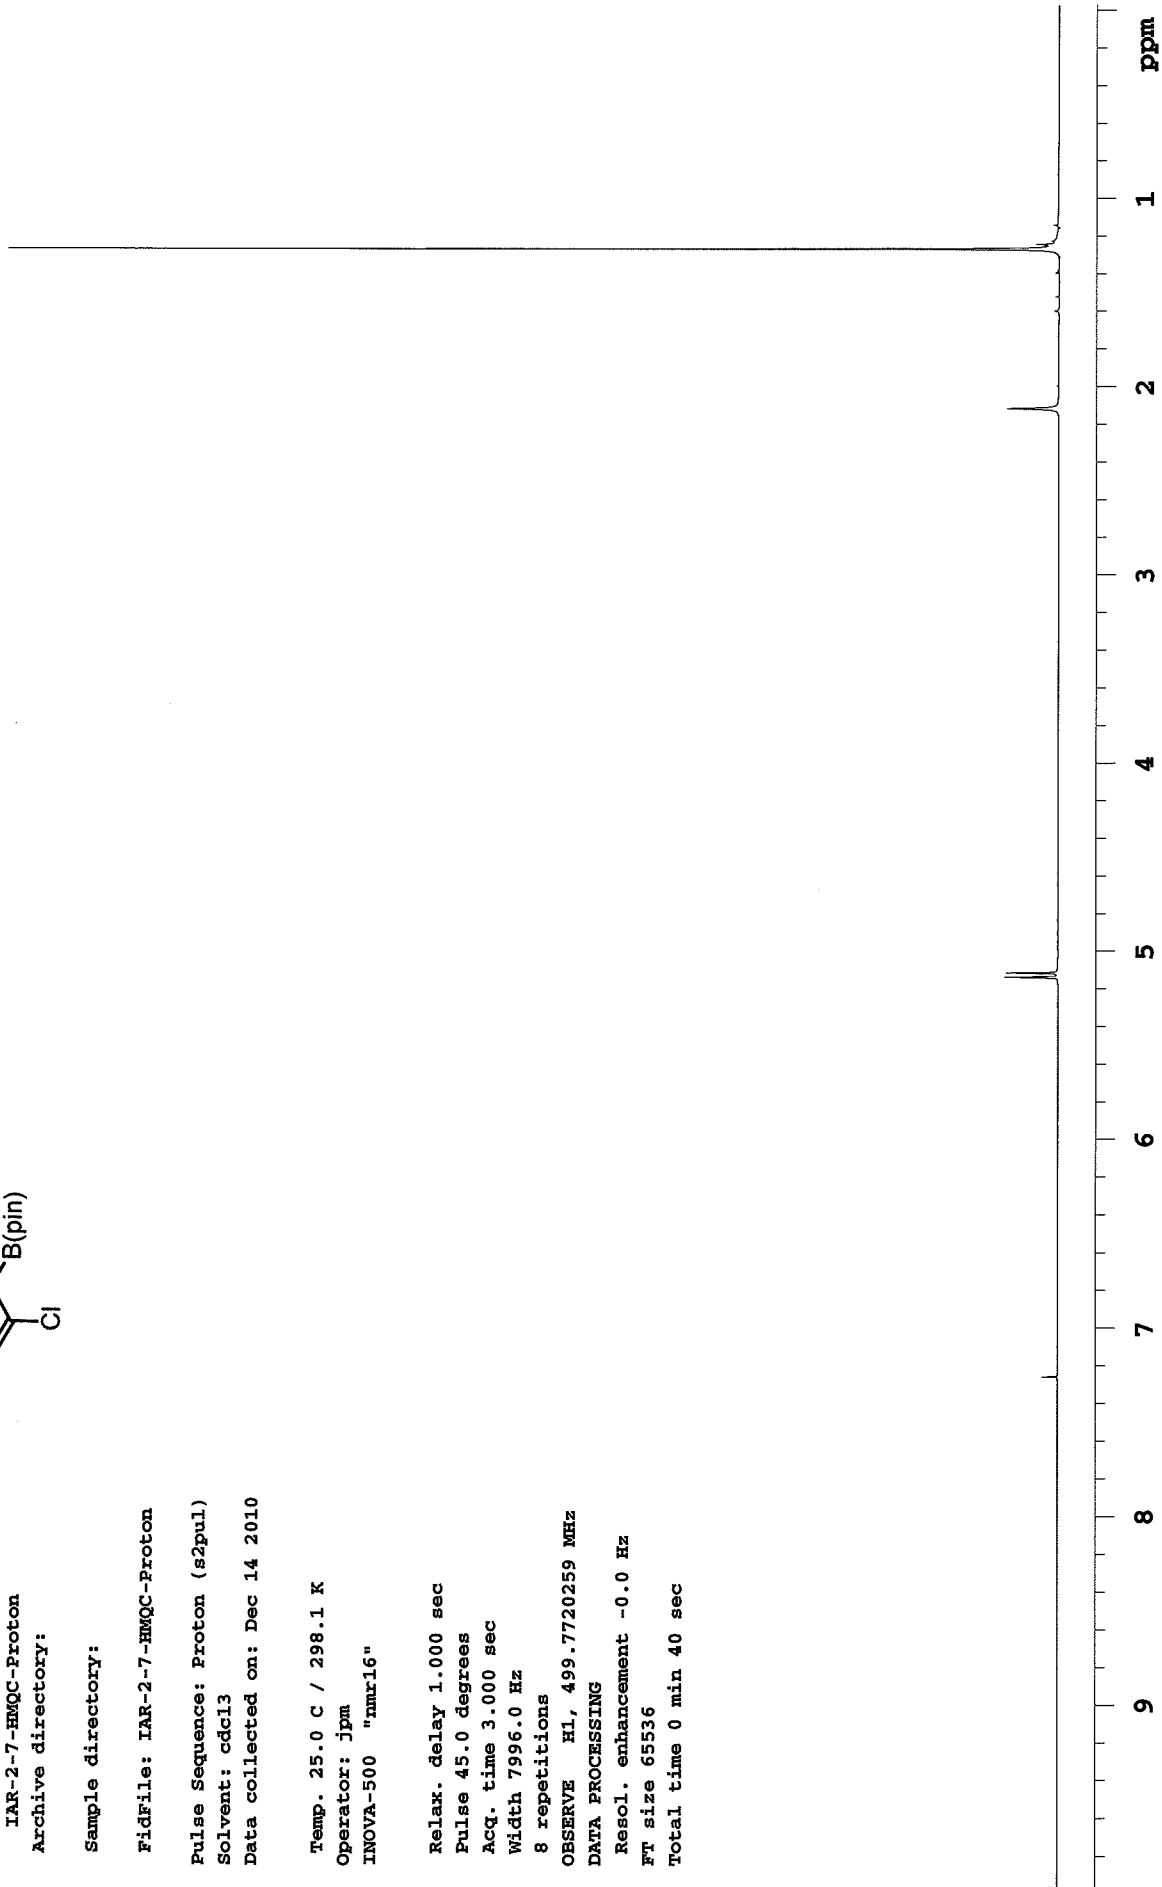

IAR-2-7-HMQC-Carbon

exp2 Carbon

|                         |                     |         |            |         |
|-------------------------|---------------------|---------|------------|---------|
| data                    | Dec 14 2010         | temp    | 25.0       | SPECIAL |
| solvent                 | cdcl3               | gain    | 30         |         |
| file                    | /home/All/jjm~ spin |         | 20         |         |
| /IAR/IAR-2-7-HMQC-- hst |                     |         | 0.008      |         |
| Carbon.fid              | pw90                |         | 12.400     |         |
| ACQUISITION             | alfa                |         | 6.600      |         |
| sw                      | 30165.9             | FLAGS   |            |         |
| at                      | 1.300               | il      | n          |         |
| np                      | 78460               | in      | n          |         |
| fb                      | 17000               | dp      | y          |         |
| bs                      | 64                  | hs      | nn         |         |
| dl                      | 1.000               |         | PROCESSING |         |
| nt                      | 5000                | lb      | 0.50       |         |
| ct                      | 128                 | fn      | not used   |         |
| TRANSMITTER             |                     | DISPLAY |            |         |
| tn                      | C13                 | sp      | -1891.3    |         |
| sfrq                    | 125.681             | wp      | 30165.5    |         |
| tof                     | 1285.2              | rf1     | 11568.1    |         |
| tpwr                    | 57                  | rfp     | 9676.4     |         |
| pw                      | 6.200               | rp      | -14.5      |         |
| DECOUPLER               | lp                  |         | -151.2     |         |
| dn                      | H1                  | PLOT    |            |         |
| dof                     | 0                   | wc      | 250        |         |
| dm                      | YYY                 | sc      | 0          |         |
| dmm                     | w                   | vs      | 3846       |         |
| dpwr                    | 45                  | th      | 4          |         |
| dmf                     | 11800               | ai      | cdc        | ph      |

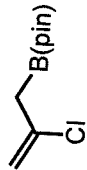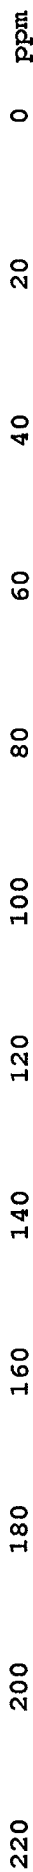

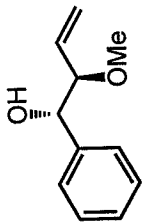

Pulse Sequence: Proton (s2pul)  
Solvent: cdcl3  
Data collected on: May 5 2011

Temp. 25.0 C / 298.1 K  
Operator: roundtri  
VMRS-500 "nmr17.bc.edu"

Relax. delay 1.000 sec  
Pulse 45.0 degrees  
Acq. time 2.049 sec  
Width 8012.8 Hz  
16 repetitions  
OBSERVE H1, 499.8808026 MHz  
DATA PROCESSING  
Resol. enhancement -0.0 Hz  
F1 size 65536  
Total time 0 min 55 sec

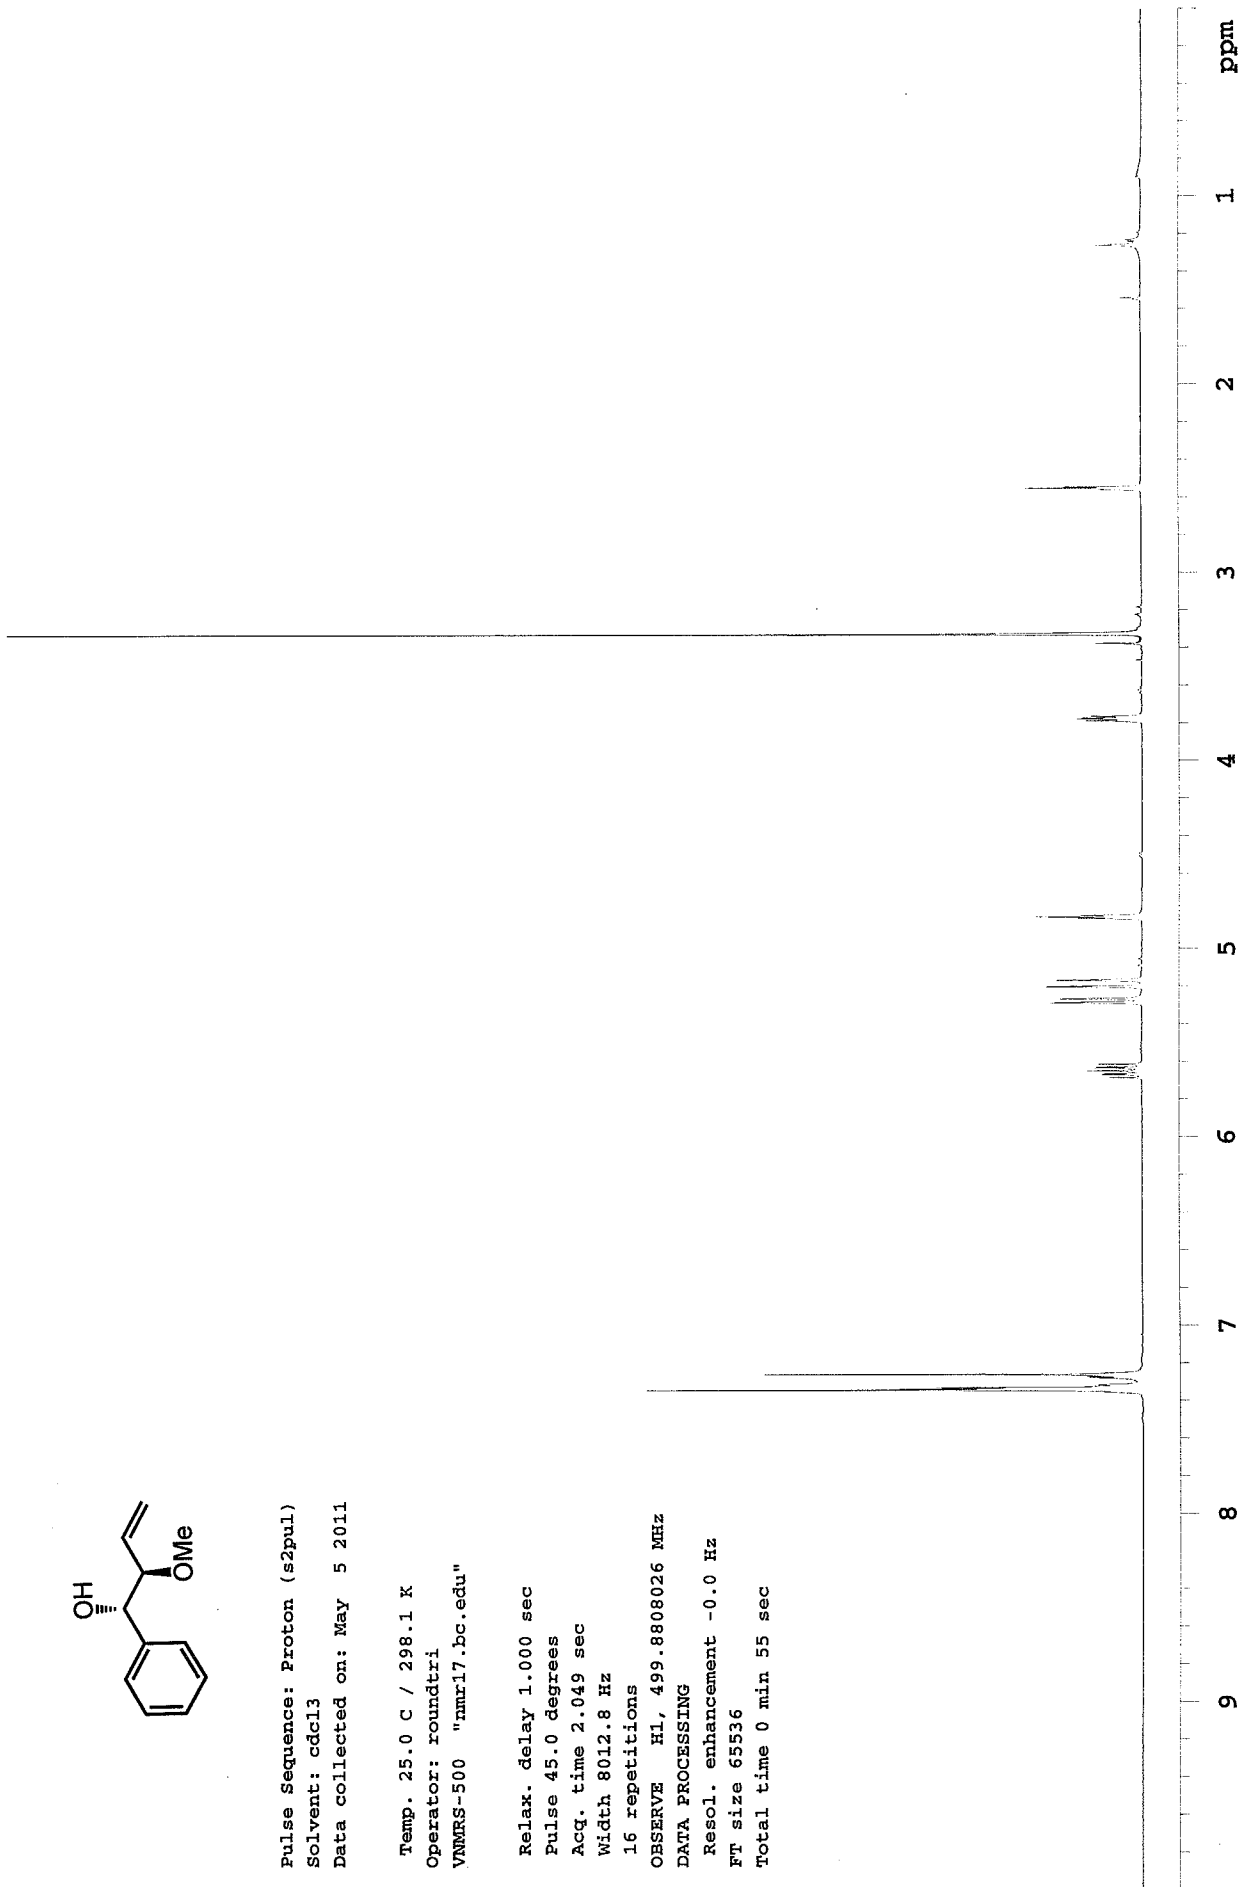

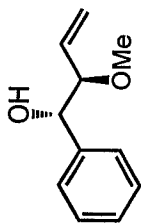

FidFile: IAR-2-101-P2-C13\_2\_101\_01

Pulse Sequence: Carbon (s2pul)  
Solvent: cdcl3  
Data collected on: May 5 2011

Temp. 25.0 C / 298.1 K  
Sample #21, Operator: zhangpa  
INOVA-500 "nmr16"

Relax. delay 1.000 sec  
Pulse 45.0 degrees  
Acq. time 1.300 sec  
Width 24509.8 Hz  
5000 repetitions  
OBSERVE C13, 100.5213087 MHz  
DECOUPLE H1, 399.7682756 MHz  
Power 40 dB  
continuously on  
WALTZ-16 modulated  
DATA PROCESSING  
Line broadening 0.5 Hz  
Ft size 65536  
Total time 3 hr, 11 min

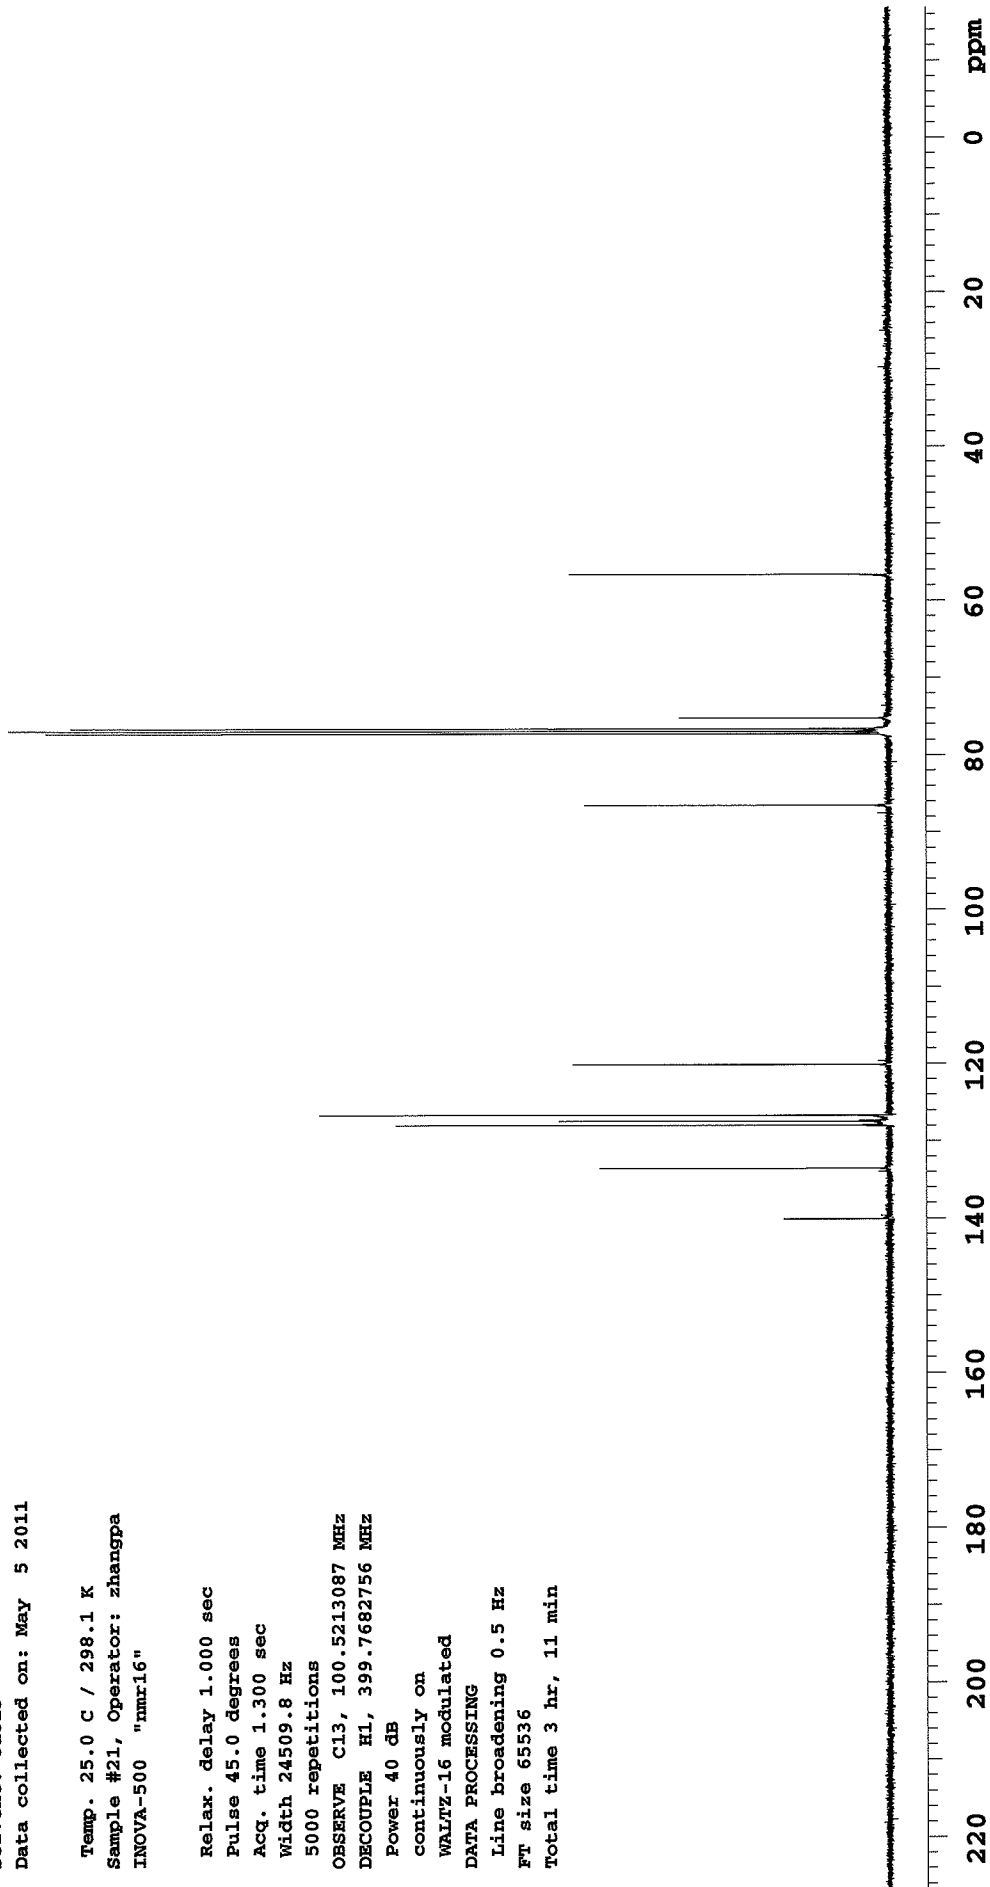

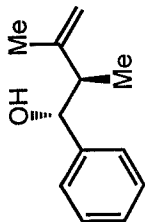

Pulse Sequence: Proton (s2pul)  
Solvent: cdcl3  
Data collected on: Jul 7 2011

Operator: jpm  
INOVA-500 "nmr16"

Relax. delay 1.000 sec  
Pulse 45.0 degrees  
Acq. time 3.000 sec  
Width 7996.0 Hz  
16 repetitions  
OBSERVE H1, 499.7720259 MHz  
DATA PROCESSING  
Resol. enhancement -0.0 Hz  
FT size 65536  
Total time 1 min 12 sec

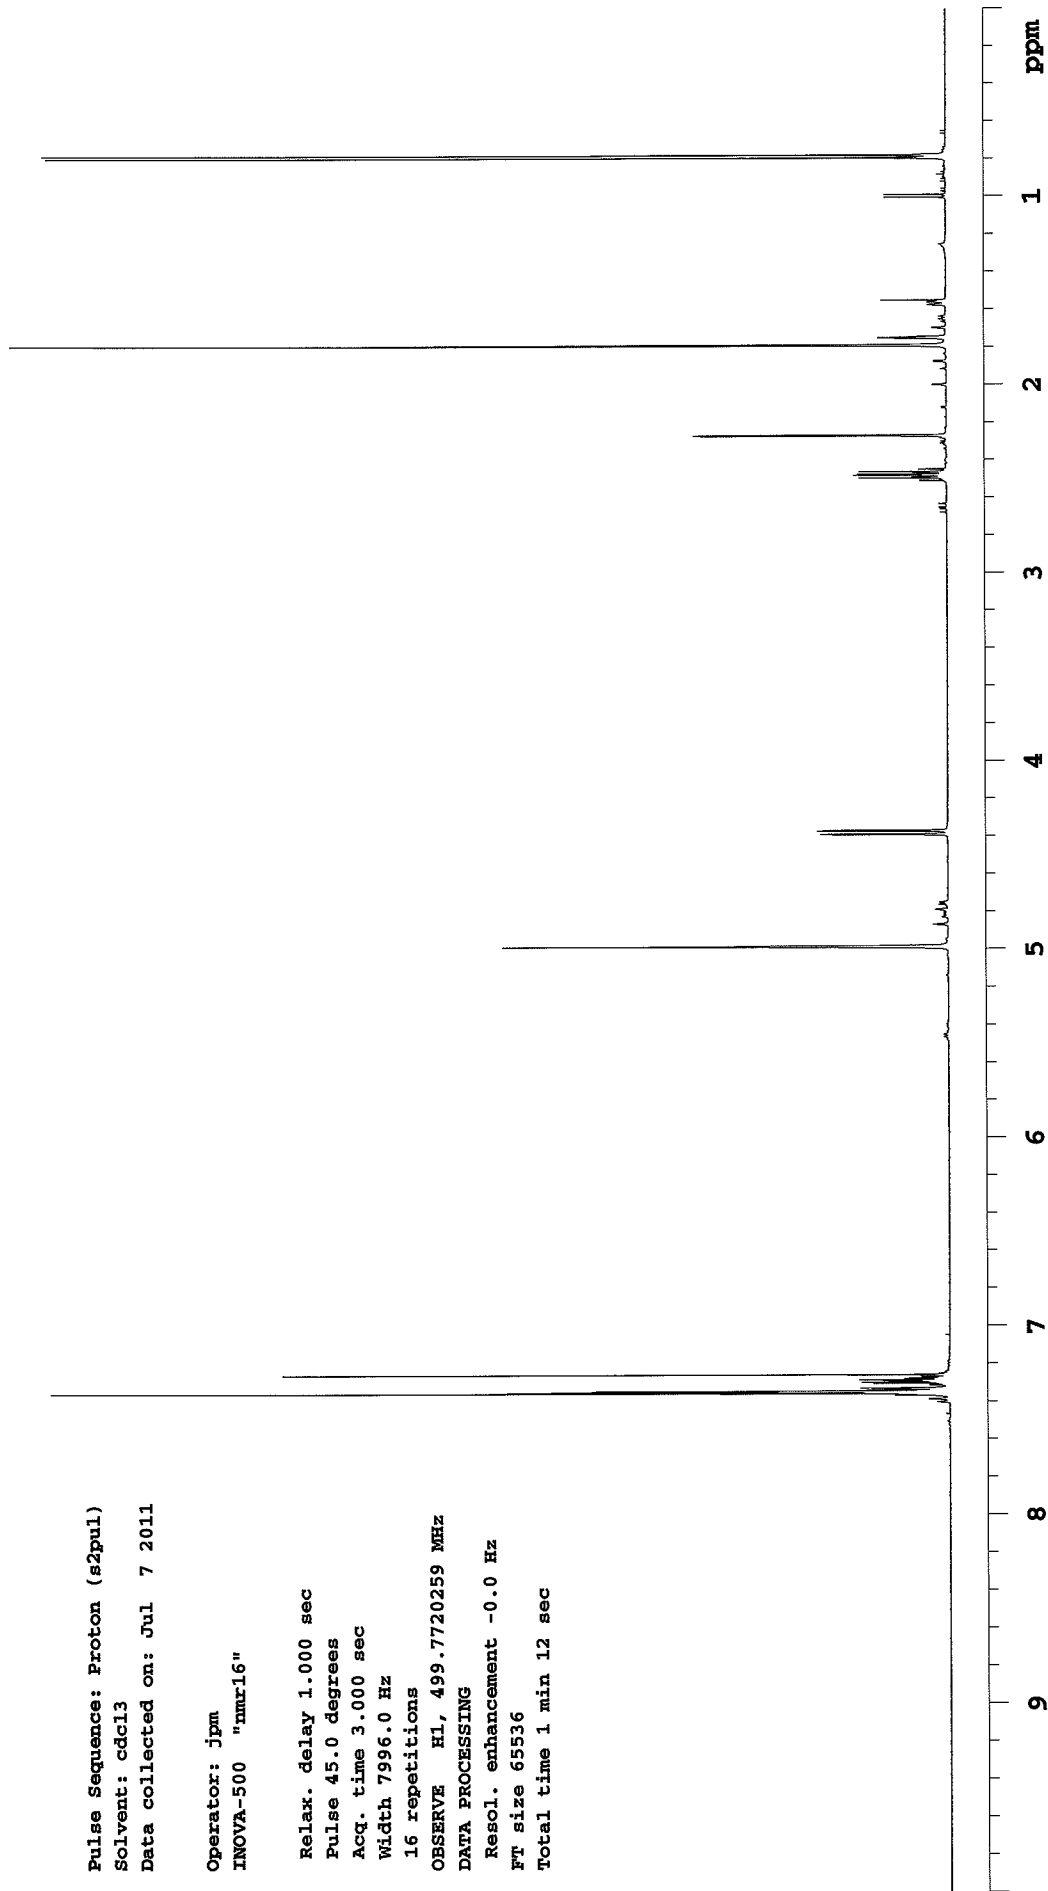

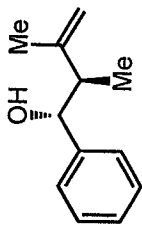

Pulse Sequence: Carbon (s2pul)  
 Solvent: cdcl3  
 Data collected on: Dec 11 2011

Temp. 25.0 C / 298.1 K  
 Operator: rountri  
 INOVA-500 "nmr16"

Relax. delay 1.000 sec  
 Pulse 45.0 degrees  
 Acq. time 1.300 sec  
 Width 30165.9 Hz  
 256 repetitions  
 OBSERVE C13, 125.667773 MHz  
 DECOUPLE H1, 499.7745112 MHz  
 Power 45 dB  
 continuously on  
 WALTZ-16 modulated  
 DATA PROCESSING  
 Line broadening 0.5 Hz  
 Ft size 131072  
 Total time 19 min

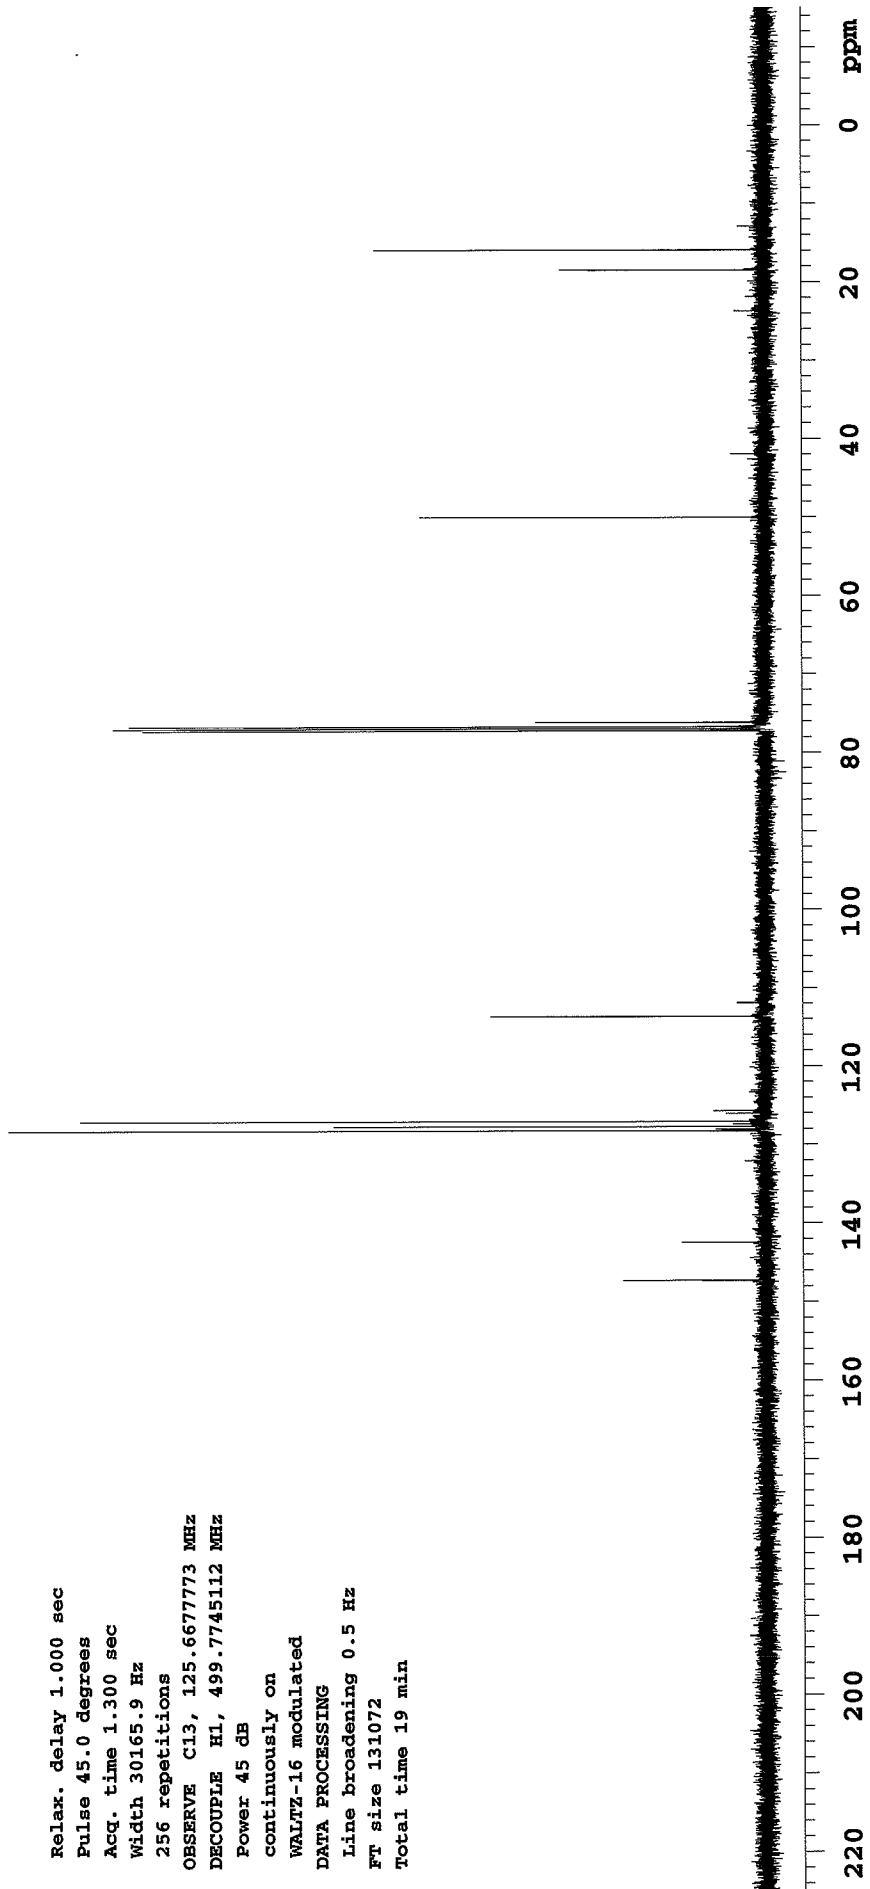

Supplement: NIHMS360655-supplement-1_si_001.pdf [file NIHMS360655-supplement-1_si_001.pdf]
